# Supplementary material for: Photo-induced 1,2-thiohydroxylation of maleimide involving disulfide and singlet oxygen
Source: Royal Society of Chemistry journal article supplement (doi:10.1039/d3cc03296e), 2023-01-01

## Supporting Information

### Photo-induced 1,2-thiohydroxylation of maleimide involving disulfide and singlet oxygen

Tamanna Khandelia, Subhendu Ghosh, Pritishree Panigrahi, Raju Mandal, Deepjyoti Boruah,  
and Bhisma K. Patel\*

Department of Chemistry, Indian Institute of Technology Guwahati, Assam, India.

E-mail: [patel@iitg.ac.in](mailto:patel@iitg.ac.in)

#### Contents:

|                                                                      |         |
|----------------------------------------------------------------------|---------|
| 1. General Information and Instrumentation                           | S2      |
| 2. Light Information and Reaction Setup                              | S2      |
| 3. Optimization of Reaction Parameters                               | S3–S4   |
| 4. General Procedure for the Synthesis of <b>3aa</b>                 | S4      |
| 5. General Procedure for the Synthesis of <b>3aa</b> in 2 mmol Scale | S4–S5   |
| 6. Mechanistic Studies                                               | S5–S12  |
| 7. Crystallographic Description                                      | S12–S13 |
| 8. References                                                        | S13     |
| 9. Spectral Data                                                     | S14–S24 |
| 10. NMR Spectra                                                      | S25–S81 |
| 11. NOE Experiment of <b>3ba</b>                                     | S82–S84 |

## 1. General Information and Instrumentation:

All chemicals were obtained from commercial sources and were used without further purification. The starting material **1** was synthesized according to previously described method.<sup>1</sup> Reactions were monitored via TLC, prepared using silica gel 60 F<sub>254</sub> (0.25 mm), and were detected under UV light at 254 nm. The chromatography separation was carried out using 60–120 mesh-sized silica gel. Ethyl acetate/ hexane mixtures were used as the eluent. <sup>1</sup>H, <sup>13</sup>C, and <sup>19</sup>F NMR spectra were recorded in 500, and 400 MHz NMR in deuterated solvents, and the chemical shifts ( $\delta$ ) are given in ppm. The <sup>1</sup>H spectra were referenced to TMS (0 ppm) for CDCl<sub>3</sub>; for <sup>13</sup>C CDCl<sub>3</sub> (77.16 ppm). IR spectra were recorded neat using an FT-IR spectrometer. HRMS was recorded using ESI (Q-TOF type mass analyzer) in positive modes. UV-vis experiment was performed in 1 mL quartz cuvettes with a path length equal to 1 cm. Photoluminescence was carried out in 1 mL quartz cuvettes.

## 2. Light Information and Reaction Setup:

Philips 4 x 5 W white LED bulbs ( $\lambda_{em,max} = 419$  nm) were used as the light source for this light-promoted reaction and no filter was used. A borosilicate 10 mL vial was used as the reaction vessel. The distance from the light source to the irradiation vessel was ~3–5 cm. Regular fan was used to ventilate the area to maintain the room temperature (27–30 °C). The reaction set-up for this photochemical reaction is shown below (Figure S1)

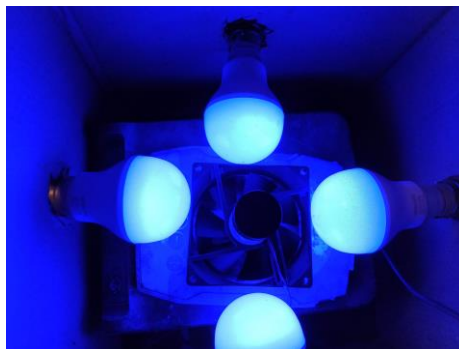

**Figure S1** Photochemical Reaction Set-up.

### 3. Optimization of Reaction Parameters:

**Table S1:** Optimization of reaction conditions

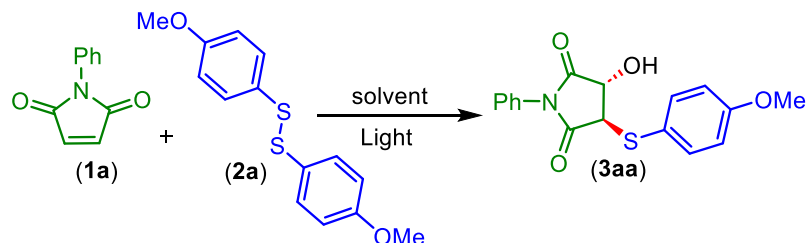

| Sl. No. | Deviation from standard conditions         | Yield% <sup>b</sup> |
|---------|--------------------------------------------|---------------------|
| 1.      | None                                       | 86                  |
| 2.      | CHCl <sub>3</sub> instead of ethyl acetate | 63                  |
| 3.      | DCE instead of ethyl acetate               | 60                  |
| 4.      | DCM instead of ethyl acetate               | 65                  |
| 5.      | TFE instead of ethyl acetate               | 71                  |
| 6.      | 1,4 dioxane instead of ethyl acetate       | 30                  |
| 7.      | Toluene instead of ethyl acetate           | 40                  |
| 8.      | PhCl instead of ethyl acetate              | 20                  |
| 9.      | EtOH instead of ethyl acetate              | 55                  |
| 10.     | 0.6 and 0.75 equivalents of <b>2a</b>      | 86 and 87           |
| 11.     | No light                                   | 0                   |
| 12.     | Green LEDs instead of blue LEDs            | 0                   |

<sup>a</sup>Reaction Conditions unless specified otherwise: **1a** (0.25 mmol), **2a** (0.125 mmol), solvent (2 mL) for 9 h under 5W x 4 blue LEDs ( $\lambda_{em,max} = 419$  nm) in an open air. <sup>b</sup>Isolated yield.

Although the yield was quite good (86%), a series of optimization studies were carried out to improve it further. Initially, various solvents were screened such as CHCl<sub>3</sub>, dichloroethane

(DCE), dichloromethane (DCM), tetrafluoroethanol (TFE), 1,4-dioxane, toluene, PhCl, EtOH, (entry 2–9, Table1). But there was no improvement in the yield and ethyl acetate turned out to be the best solvent. Upon increasing the loading of 1,2-*bis*(4-methoxyphenyl)disulfane (**2a**) to 0.6 and 0.75 equiv there was no further enhancement in the yield (entry 10, Table1). Also, there was no reaction in the absence of light and under green LEDs (entry 11-12, Table 1). Thus, the optimized condition found was *N*-phenylmaleimide (**1a**, 1 equiv) and 1,2-*bis*(4-methoxyphenyl)disulfane (**2a**, 0.5 equiv) in ethyl acetate under the exposure of blue light (4 x 5W,  $\lambda_{em,max} = 419$  nm) in an open air.

#### 4. General Procedure for the Synthesis of **3aa**

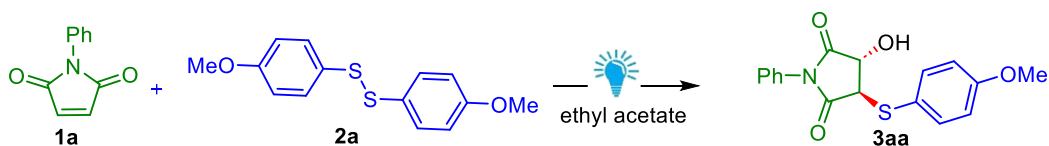

An oven-dried 10 mL vial was charged with *N*-phenylmaleimide (**1a**) (0.25 mmol, 43 mg), 1,2-*bis*(4-methoxyphenyl)disulfane (**2a**) (0.125 mmol, 35 mg), a magnetic stir bar in ethyl acetate (2 mL) and was stirred at room temperature in an open-air for 9 h under the irradiation of 4 x 5 W blue LEDs ( $\lambda_{em,max} = 419$  nm) approximately at a distance of ~3–5 cm. The progress of the reaction was monitored via TLC. After completion of the reaction, the solvent was removed by rotary evaporation. The reaction mixture was then mixed with water (10 mL) and extracted with ethyl acetate (2 × 15 mL). The organic layer was dried over anhydrous sodium sulfate and was evaporated under reduced pressure. The residue so obtained was then purified over column chromatography by eluting with hexane: ethyl acetate (83:17) mixture to afford the desired product **3aa** as grey solid in 86% yields (71 mg).

#### 5. General Procedure for the Synthesis of **3aa** in 2 mmol Scale

An oven-dried 10 mL vial was charged with *N*-phenylmaleimide (**1a**) (2 mmol, 346 mg), 1,2-*bis*(4-methoxyphenyl)disulfane (**2a**) (1 mmol, 278 mg), a magnetic stir bar in ethyl acetate (3 mL) and was stirred at room temperature in an open-air for 9 h under the irradiation of 4 x 5 W blue LEDs ( $\lambda_{em,max} = 419$  nm) approximately at a distance of ~3–5 cm. The progress of the reaction was monitored via TLC. After completion of the reaction, the solvent was removed by rotary evaporation. The reaction mixture was then mixed with water (10 mL) and extracted with

ethyl acetate ( $2 \times 15$  mL). The organic layer was dried over anhydrous sodium sulfate and was evaporated under reduced pressure. The residue so obtained was then purified over column chromatography by eluting with hexane: ethyl acetate (83:17) mixture to afford the desired product **3aa** as grey solid in 79% yields (519 mg).

## 6. Mechanistic Studies

### (A) Procedure for Trapping of Radicals:

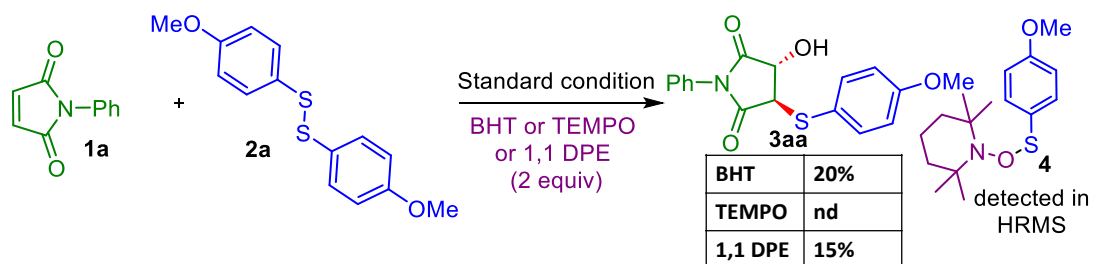

An oven-dried 10 mL vial was charged with *N*-phenylmaleimide (**1a**) (0.25 mmol, 43 mg), 1,2-bis(4-methoxyphenyl)disulfane (**2a**) (0.125 mmol, 35 mg), BHT (2 equiv, 0.5 mmol, 110 mg) or TEMPO (2 equiv, 0.5 mmol, 78 mg) or 1,1-diphenylethylene (DPE) (2 equiv, 0.5 mmol, 90 mg) a magnetic stir bar in ethyl acetate (1.5 mL) and was stirred at room temperature in an open-air for 9 h under the irradiation of 4 x 5 W blue LEDs ( $\lambda_{em,max} = 419$  nm) approximately at a distance of ~3–5 cm. The solvent was removed by rotary evaporation. The reaction mixture was then mixed with water (10 mL) and extracted with ethyl acetate ( $2 \times 15$  mL). The organic layer was dried over anhydrous sodium sulfate and was evaporated under reduced pressure. The residue so obtained was then purified over column chromatography by eluting with hexane: ethyl acetate (83:17) mixture to afford the product **3aa** as grey solid in 16 mg (20% yield) for BHT, 0 mg (0% yield) for TEMPO and 12 mg (15% yield) for DPE. These results support the radical nature of the reaction.

### (B) Procedure for Detection of Singlet Oxygen and Superoxide:

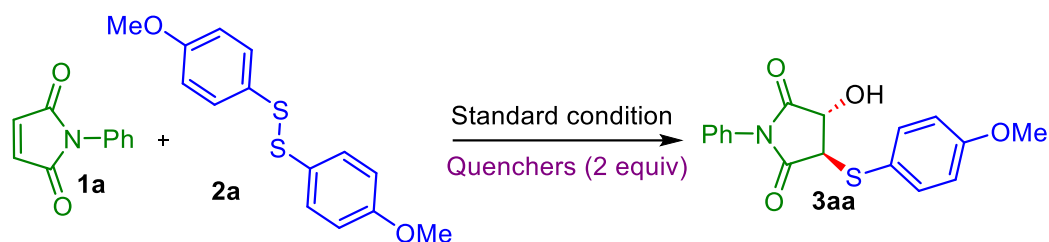

| Quencher (2 equiv)     | Role                    | Yield% |
|------------------------|-------------------------|--------|
| DABCO                  | Singlet oxygen quencher | 00     |
| <i>p</i> -benzoquinone | Superoxide quencher     | 81%    |

An oven-dried 10 mL vial was charged with *N*-phenylmaleimide (**1a**) (0.25 mmol, 43 mg), 1,2-*bis*(4-methoxyphenyl)disulfane (**2a**) (0.125 mmol, 35 mg), DABCO (2 equiv, 0.5 mmol, 56 mg) or *p*-benzoquinone (2 equiv, 0.5 mmol, 54 mg), a magnetic stir bar in ethyl acetate (1.5 mL) and was stirred at room temperature in an open-air for 9 h under the irradiation of 4 x 5 W blue LEDs ( $\lambda_{em,max} = 419$  nm) approximately at a distance of ~3–5 cm. The solvent was removed by rotary evaporation. The reaction mixture was then mixed with water (10 mL) and extracted with ethyl acetate (2 x 15 mL). The organic layer was dried over anhydrous sodium sulfate and was evaporated under reduced pressure. The residue so obtained was then purified over column chromatography by eluting with hexane: ethyl acetate (83:17) mixture to afford the product **3aa** as grey solid in 0 mg (0% yield) for DABCO and 66 mg (81% yield) for *p*-benzoquinone. The failure to obtain the product **3aa** in the presence of DABCO confirms the involvement of the singlet oxygen in the reaction and for *p*-benzoquinone, the 81% yield of **3aa** suggests noninvolvement of superoxide in the reaction.

### (C) Procedure for Singlet Oxygen Trapping:

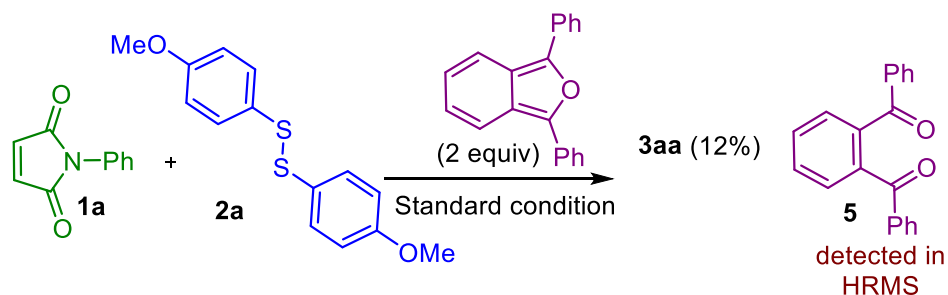

An oven-dried 10 mL vial was charged with *N*-phenylmaleimide (**1a**) (0.25 mmol, 43 mg), 1,2-*bis*(4-methoxyphenyl)disulfane (**2a**) (0.125 mmol, 35 mg), 1,3-diphenylisobenzofuran (2 equiv, 0.5 mmol, 135 mg) a magnetic stir bar in ethyl acetate (1.5 mL) and was stirred at room temperature in an open-air for 9 h under the irradiation of 4 x 5 W blue LEDs ( $\lambda_{em,max} = 419$  nm) approximately at a distance of ~3–5 cm. The solvent was removed by rotary evaporation. The reaction mixture was then mixed with water (10 mL) and extracted with ethyl acetate (2 x 15 mL). The organic layer was dried over anhydrous sodium sulfate and was evaporated under reduced pressure. The residue so obtained was then purified over column chromatography by eluting with hexane: ethyl acetate (83:17) mixture to afford the product **3aa** as grey solid in 12% yields (10 mg) and 1,2-phenylenebis(phenylmethanone) (**5**) was detected in HRMS analysis of the crude reaction mixture.

#### (D) Procedure for Investigation of Origin of Hydroxy Functionality

##### (i) H<sub>2</sub>O<sup>18</sup> Labelling Experiment:

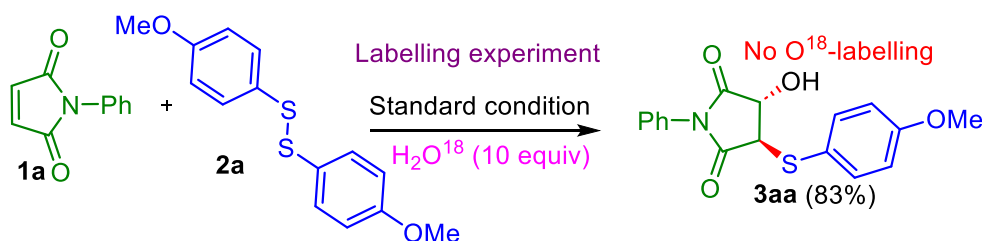

An oven-dried 10 mL vial was charged with *N*-phenylmaleimide (**1a**) (0.25 mmol, 43 mg), 1,2-*bis*(4-methoxyphenyl)disulfane (**2a**) (0.125 mmol, 35 mg), H<sub>2</sub>O<sup>18</sup> (10 equiv, 2.5 mmol, 50 mg) a magnetic stir bar in ethyl acetate (1.5 mL) and was stirred at room temperature for 9 h under the irradiation of 4 x 5 W blue LEDs ( $\lambda_{em,max} = 419$  nm) approximately at a distance of ~3–5 cm. The solvent was removed by rotary evaporation. The reaction mixture was then purified over column chromatography by eluting with hexane: ethyl acetate (83:17) mixture to afford the product **3aa** as grey solid in 83% yields (68 mg). No H<sub>2</sub>O<sup>18</sup> labelled **3aa** was detected.

##### (ii) Reaction in Dry and Argon Atmosphere:

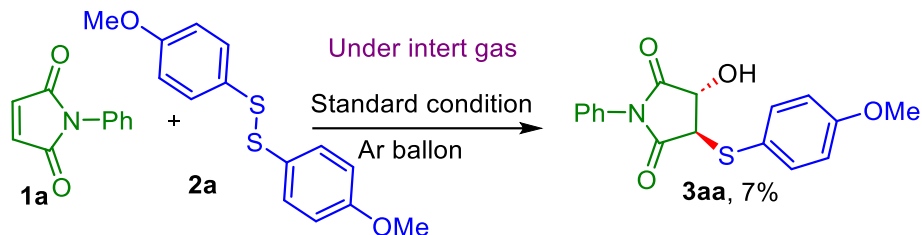

An oven-dried 10 mL vial was charged with *N*-phenylmaleimide (**1a**) (0.25 mmol, 43 mg), 1,2-*bis*(4-methoxyphenyl)disulfane (**2a**) (0.125 mmol, 35 mg), a magnetic stir bar in dry ethyl acetate (1.5 mL) and was stirred at room temperature for 9 h under an argon atmosphere under the irradiation of 4 x 5 W blue LEDs ( $\lambda_{\text{em,max}} = 419$  nm) approximately at a distance of ~3–5 cm. The solvent was removed by rotary evaporation. The reaction mixture was then purified over column chromatography by eluting with hexane: ethyl acetate (83:17) mixture to afford the product **3aa** in 7% yield.

**(E) Reaction with 4-methoxybenzenethiol (6a) in Lieu of 1,2-*bis*(4-methoxyphenyl)disulfane (2a)**

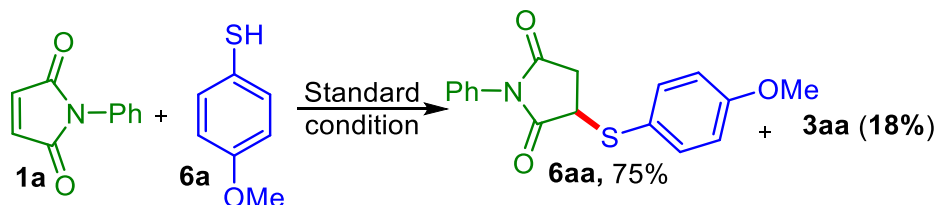

An oven-dried 10 mL vial was charged with *N*-phenylmaleimide (**1a**) (0.25 mmol, 43 mg), 4-methoxybenzenethiol (**6a**) (0.25 mmol, 35 mg), a magnetic stir bar in ethyl acetate (1.5 mL) and was stirred at room temperature in an open air for 9 h the irradiation of 4 x 5 W blue LEDs ( $\lambda_{\text{em,max}} = 419$  nm) approximately at a distance of ~3–5 cm. The solvent was removed by rotary evaporation. The reaction mixture was then mixed with water (10 mL) and extracted with ethyl acetate (2 x 15 mL). The organic layer was dried over anhydrous sodium sulfate and was evaporated under reduced pressure. The residue so obtained was then purified over column chromatography by eluting with hexane: ethyl acetate (88:12) mixture to afford the product **6aa** in 75% yield (58 mg) and **3aa** in 18% yields (14 mg).



## (F) HRMS Analysis

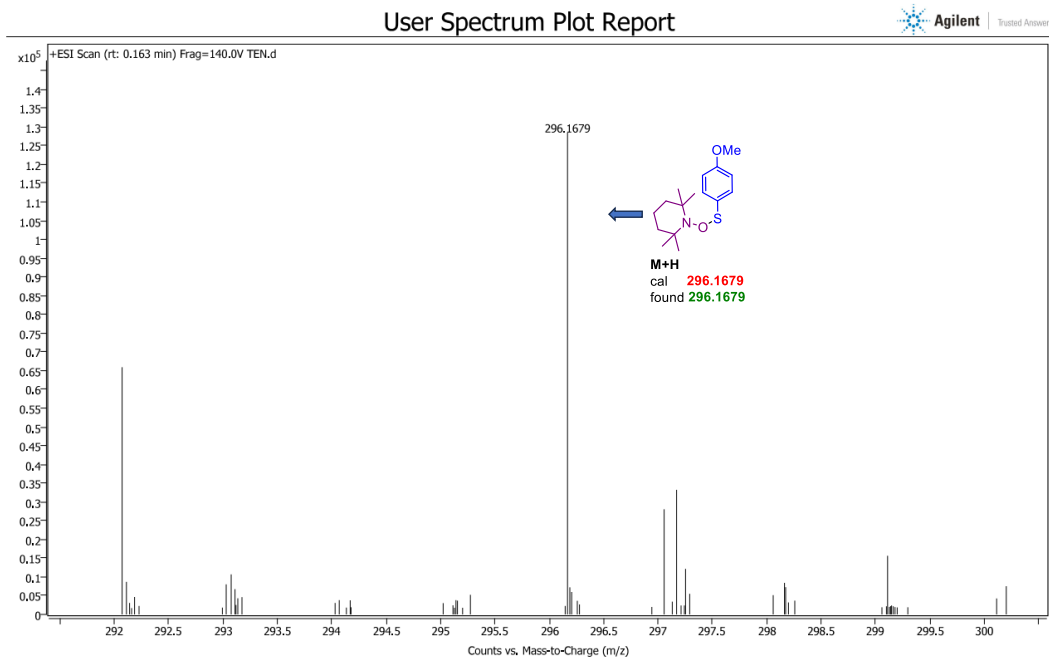

Figure S2: Detection of 4

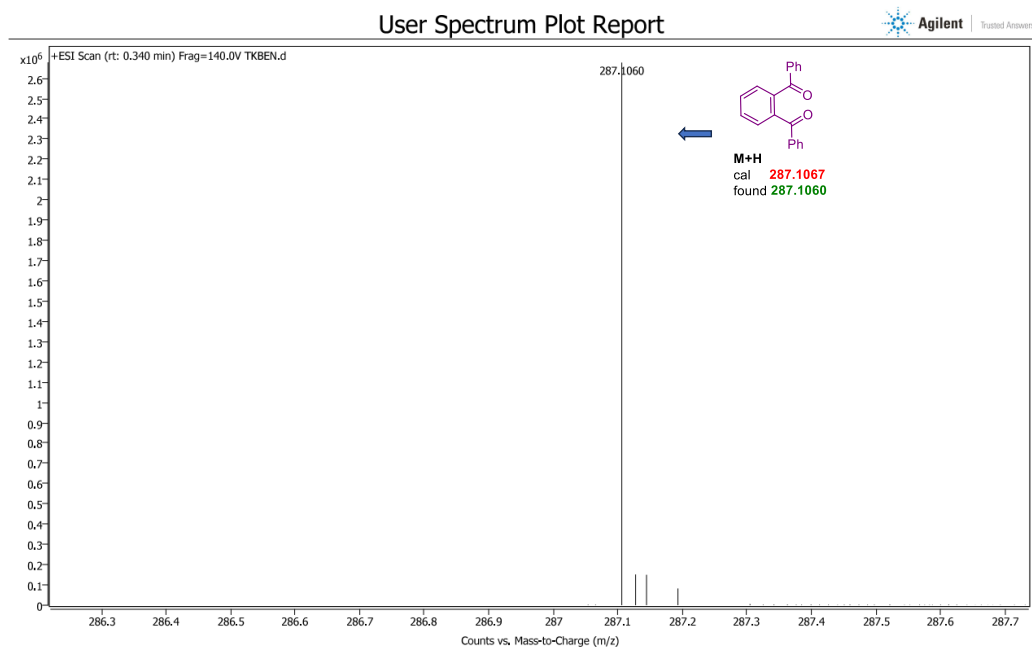

Figure S3: Detection of 5

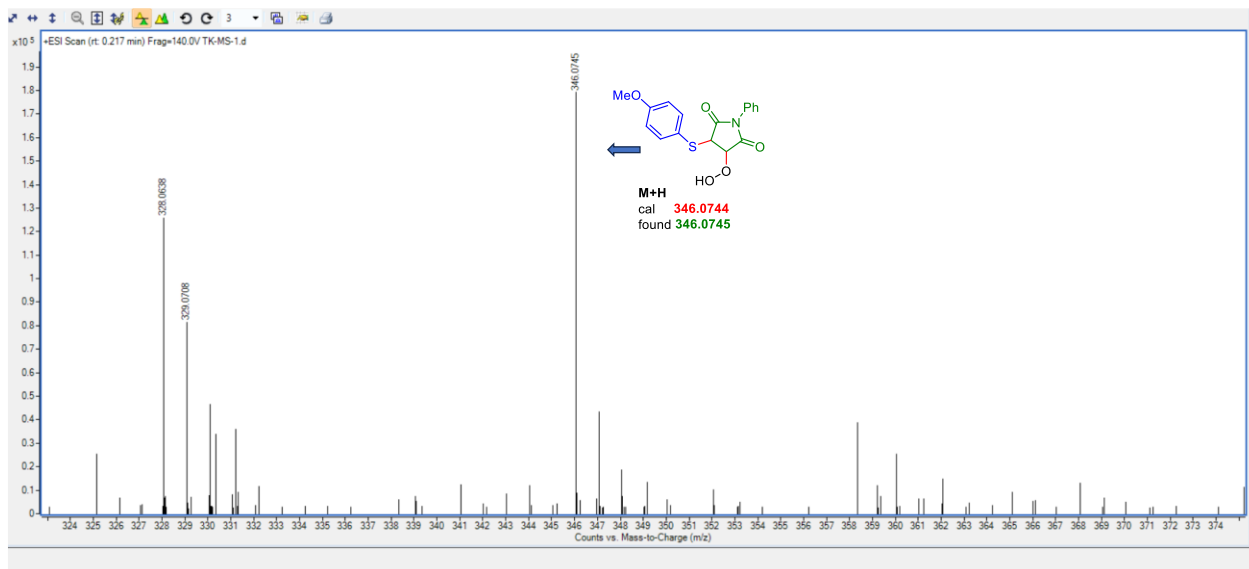

**Figure S4: Detection of intermediate IV in crude reaction aliquot.**

**(G) Detection of H<sub>2</sub>O<sub>2</sub> Release During the Reaction.**

**(i) H<sub>2</sub>O<sub>2</sub> detection by iodometry**

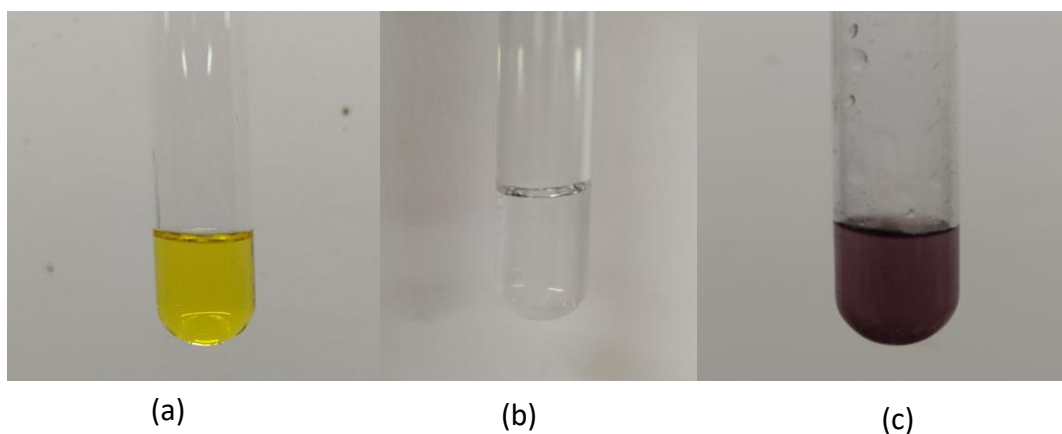

**Figure S5: H<sub>2</sub>O<sub>2</sub> detection experiment: (a) Reaction mixture after completion (b) Portion of the freshly prepared KI starch solution in 0.02 M H<sub>2</sub>SO<sub>4</sub>. (c) Appearance of dark blue colour due to the formation of I<sub>2</sub>-starch complex (H<sub>2</sub>O<sub>2</sub> detected).**

An oven-dried 10 mL vial was charged with *N*-phenylmaleimide (**1a**) (0.25 mmol, 43 mg), 1,2-*bis*(4-methoxyphenyl)disulfane (**2a**) (0.125 mmol, 35 mg), a magnetic stir bar in ethyl acetate (2 mL) and was stirred at room temperature in an open-air for 9 h under the irradiation of 4 x 5 W blue LEDs ( $\lambda_{em,max} = 419$  nm) approximately at a distance of  $\sim 3-5$  cm. . In a separate test tube, KI-starch solution was prepared by adding aqueous solution of KI (0.2 mmol in 1.5 mL H<sub>2</sub>O), 0.02 M H<sub>2</sub>SO<sub>4</sub> (1 ml) and 0.5 mL of freshly prepared starch solution. To a portion of the reaction mixture, the freshly prepared KI-starch solution was added and stirred vigorously. Instantly, the aqueous solution turned to dark blue colour (Fig S5c) indicating the presence of H<sub>2</sub>O<sub>2</sub>.

**(ii) H<sub>2</sub>O<sub>2</sub> detection in a typical reaction with KMnO<sub>4</sub>.**

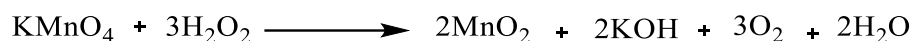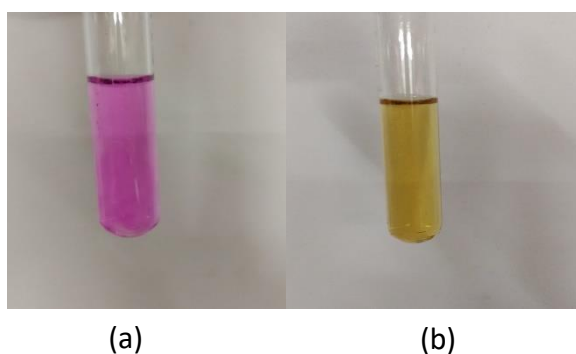

**Figure S6: (a) KMnO<sub>4</sub> solution (b) KMnO<sub>4</sub> solution after addition of reaction mixture.**

An oven-dried 10 mL vial was charged with *N*-phenylmaleimide (**1a**) (0.25 mmol, 43 mg), 1,2-*bis*(4-methoxyphenyl)disulfane (**2a**) (0.125 mmol, 35 mg), a magnetic stir bar in ethyl acetate (2 mL) and was stirred at room temperature in an open-air for 9 h under the irradiation of 4 x 5 W blue LEDs ( $\lambda_{em,max} = 419$  nm) approximately at a distance of  $\sim 3-5$  cm. . In a separate test tube, KMnO<sub>4</sub> solution was prepared by adding KMnO<sub>4</sub> (300  $\mu$ M) in H<sub>2</sub>O. A portion of the reaction mixture was added to the KMnO<sub>4</sub> solution (Fig S6a). Instantly, the aqueous solution turned to pale yellow colour (Fig S6b) indicating the presence of H<sub>2</sub>O<sub>2</sub>.

## (H) UV- vis and Emission Spectra

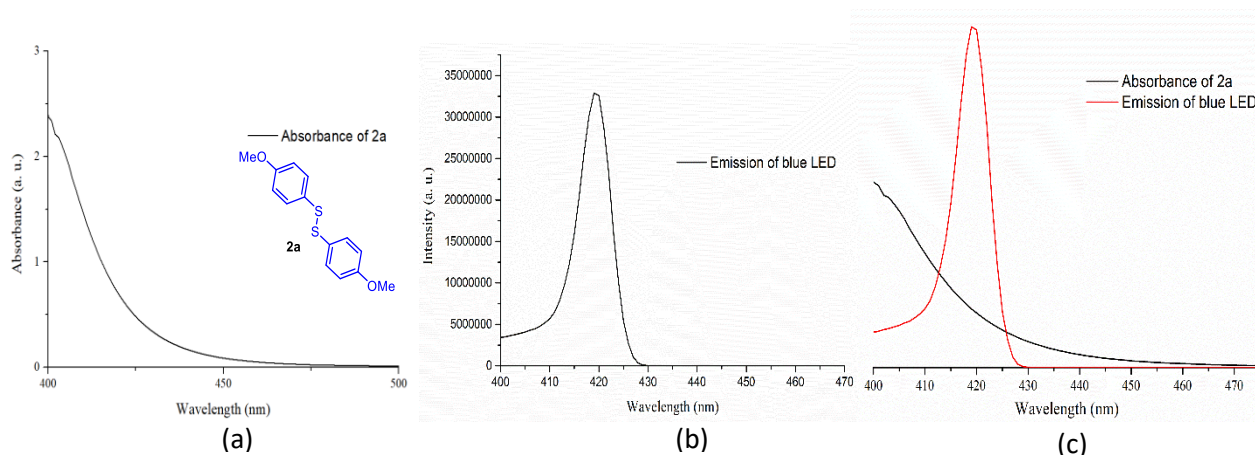

**FigS7: (a) UV-vis absorbance of 1,2-bis(4-methoxyphenyl)disulfane (2a) in Ethyl acetate at a concentration of 0.05 M at room temperature. (b) Emission spectra of blue LED. (c) spectral overlap of UV-vis absorption spectrum of 2a and emission spectra of blue LED.**

The absorbance spectra of 1,2-bis(4-methoxyphenyl)disulfane (**2a**) has been recorded which show an absorbance in the region 400–440 nm. Also, the emission spectra of blue LED have been recorded, which has a maximum emission at 419 nm. The absorbance spectra of **2a** and the emission spectra of blue LED overlap each other as shown in Fig S7c.

## 7. Crystallographic Description

Crystal data were collected with Bruker Smart Apex-II CCD diffractometer using graphite monochromated MoK $\alpha$  radiation ( $\lambda = 0.71073 \text{ \AA}$ ) at 298 K for **3aa**. Cell parameters were retrieved using SMART<sup>a</sup> software and refined with SAINT<sup>a</sup> on all observed reflections. Data reduction was performed with the SAINT software and corrected for Lorentz and polarization effects. Absorption corrections were applied with the program SADABS.<sup>b</sup> The structure was solved by direct methods implemented in SHELX-2014<sup>c</sup> program and refined by full-matrix least-squares methods on F<sup>2</sup>. All non-hydrogen atomic positions were located in difference Fourier maps and refined anisotropically. The hydrogen atoms were placed in their geometrically generated positions.

a. SMART V 4.043 Software for the CCD Detector System; Siemens Analytical Instruments Division: Madison, WI, 2008.

b. SAINT Plus (v 6.14) Bruker AXS Inc., Madison, WI, 2008.

- c. Sheldrick, G. M. SHELXL-2014, Program for the Refinement of Crystal Structures; University of Göttingen: Göttingen (Germany), 1997.

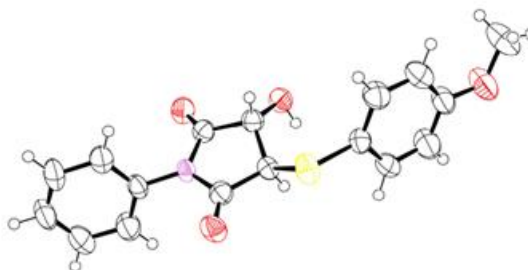

**Figure S8.** ORTEP diagram of **3aa** with ellipsoid probability 50%.

**Table S2.** Crystal Data table for **3aa**

|                                   |                                                                               |
|-----------------------------------|-------------------------------------------------------------------------------|
| Empirical formula                 | C <sub>17</sub> H <sub>15</sub> NO <sub>4</sub> S                             |
| CCDC number                       | 2278695                                                                       |
| Formula weight                    | 329.36                                                                        |
| Temperature                       | 298 (2)                                                                       |
| Wavelength                        | 0.71073 Å                                                                     |
| Crystal system                    | orthorhombic                                                                  |
| Space group                       | P 21 21 21                                                                    |
| Unit cell dimensions              | a = 5.2038(7) Å, b = 13.8139(17) Å, c = 21.853(3) Å α = 90°, β = 90°, γ = 90° |
| Volume                            | 1570.9(3) Å <sup>3</sup>                                                      |
| Z                                 | 4                                                                             |
| Density (calculated)              | 1.393 g/cm <sup>-3</sup>                                                      |
| Absorption coefficient            | 0.226                                                                         |
| F(000)                            | 688                                                                           |
| Theta range for data collection   | 1.744 to 24.991°                                                              |
| Index ranges                      | -6 ≤ h ≤ 6, -16 ≤ k ≤ 16, -25 ≤ l ≤ 25                                        |
| Reflections collected             | 37567                                                                         |
| Refinement method                 | Full-matrix least-squares on F <sup>2</sup>                                   |
| Data / restraints / parameters    | 2765 / 0 / 212                                                                |
| Goodness-of-fit on F <sup>2</sup> | 0.895                                                                         |
| Final R indices [I > 2σ(I)]       | 0.0594, wR <sub>2</sub> = 0.1401                                              |
| R indices (all data)              | 0.1223, wR <sub>2</sub> = 0.1804                                              |

## 8. References:

1. R. Mandal, B. Emayavaramban, B. Sundararaju, *Org. Lett.* 2018, **20**, 2835.

## 9. Spectral Data

### (3*S*,4*R*)-3-Hydroxy-4-((4-methoxyphenyl)thio)-1-phenylpyrrolidine-2,5-dione (3aa)

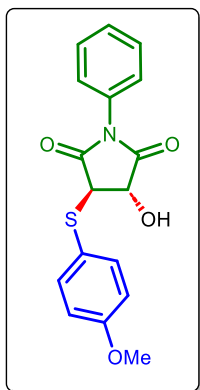

Grey solid (71 mg, 86% yield), m.p. 140–143 °C; purified over a column of silica gel (17% ethyl acetate in hexane); <sup>1</sup>H NMR (500 MHz, CDCl<sub>3</sub>) δ 7.56 (d, *J* = 8.5 Hz, 2H), 7.46–7.43 (m, 2H), 7.41–7.38 (m, 1H), 7.14 (d, *J* = 7.0 Hz, 2H), 6.88 (d, *J* = 9.0 Hz, 2H), 4.62 (d, *J* = 4.0 Hz, 1H), 3.98 (d, *J* = 5.0 Hz, 1H), 3.81 (s, 3H), 3.30 (s, 1H); <sup>13</sup>C{<sup>1</sup>H} NMR (126 MHz, CDCl<sub>3</sub>) δ 174.7, 171.6, 161.2, 137.6, 131.3, 129.4, 129.2, 126.3, 120.3, 115.2, 72.9, 55.6, 53.7. IR (neat, cm<sup>-1</sup>) 3155, 3054, 1599, 1489, 1452, 1328, 1258, 1049, 758, 696. HRMS (ESI) [M + H]<sup>+</sup> calcd for C<sub>17</sub>H<sub>16</sub>NO<sub>4</sub>S<sup>+</sup> 330.0795, found 330.0796.

### (3*S*,4*R*)-3-Hydroxy-4-((4-methoxyphenyl)thio)-1-(*p*-tolyl)pyrrolidine-2,5-dione (3ba)

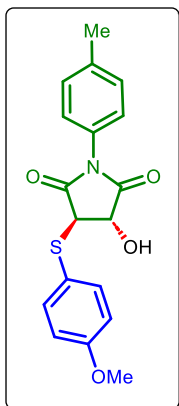

White solid (72 mg, 84% yield); m.p. 137–140 °C; purified over a column of silica gel (16% ethyl acetate in hexane); <sup>1</sup>H NMR (500 MHz, CDCl<sub>3</sub>) δ 7.55 (d, *J* = 8.5 Hz, 2H), 7.24 (d, *J* = 8.0 Hz, 2H), 7.01 (d, *J* = 8.0 Hz, 2H), 6.88 (d, *J* = 8.0 Hz, 2H), 4.62–4.60 (m, 1H), 3.97 (d, *J* = 5.0 Hz, 1H), 3.81 (s, 3H), 3.39 (s, 1H), 2.37 (s, 3H); <sup>13</sup>C{<sup>1</sup>H} NMR (126 MHz, CDCl<sub>3</sub>) δ 174.9, 171.8, 161.2, 139.4, 137.6, 130.0, 128.6, 126.1, 120.3, 115.2, 72.9, 55.6, 53.7, 21.4. IR (neat, cm<sup>-1</sup>) 3388, 1699, 1591, 1493, 1395, 1245, 1178, 1024, 798, 730. HRMS (ESI) [M + H]<sup>+</sup> calcd for C<sub>18</sub>H<sub>18</sub>NO<sub>4</sub>S<sup>+</sup> 344.0951, found 344.0946.

### (3*S*,4*R*)-1-(4-Bromophenyl)-3-hydroxy-4-((4-methoxyphenyl)thio)pyrrolidine-2,5-dione (3ca)

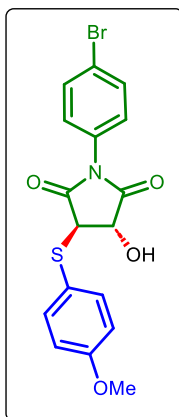

White solid (88 mg, 87% yield); m.p. 180–182 °C; purified over a column of silica gel (16% ethyl acetate in hexane); <sup>1</sup>H NMR (500 MHz, CDCl<sub>3</sub>) δ 7.57 (d, *J* = 8.5 Hz, 2H), 7.54 (d, *J* = 8.5 Hz, 2H), 7.06 (d, *J* = 8.5 Hz, 2H), 6.88 (d, *J* = 8.5 Hz, 2H), 4.63–4.61 (m, 1H), 3.97 (d, *J* = 5.0 Hz, 1H), 3.81 (s, 3H), 3.15 (s, 1H); <sup>13</sup>C{<sup>1</sup>H} NMR (126 MHz, CDCl<sub>3</sub>) δ 174.3, 171.3, 161.3, 137.6, 132.6, 132.5, 130.2, 127.7, 123.1, 121.4, 120.1, 115.3, 73.0, 55.6, 53.6. IR (neat, cm<sup>-1</sup>) 3389,

1705, 1592, 1491, 1392, 1244, 1177, 1014, 828, 767. HRMS (ESI)  $[M + H]^+$  calcd for  $C_{17}H_{15}BrNO_4S^+$  407.9900, found 407.9900.

**(3*S*,4*R*)-3-Hydroxy-1-(4-iodophenyl)-4-((4-methoxyphenyl)thio)pyrrolidine-2,5-dione (3da)**

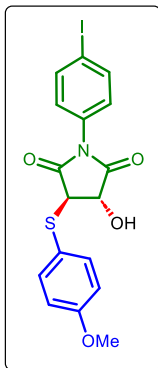

Light yellow solid (101 mg, 89% yield); m.p. 191–196°C; purified over a column of silica gel (17% ethyl acetate in hexane);  $^1H$  NMR (400 MHz,  $CDCl_3$ )  $\delta$  7.77 (d,  $J = 8.4$  Hz, 2H), 7.54 (d,  $J = 8.8$  Hz, 2H), 6.91 (d,  $J = 8.8$  Hz, 2H), 6.87 (d,  $J = 8.8$  Hz, 2H), 4.61 (d,  $J = 5.2$  Hz, 1H), 3.97 (d,  $J = 4.8$  Hz, 1H), 3.81 (s, 3H), 3.40 (s, 1H);  $^{13}C\{^1H\}$  NMR (126 MHz,  $CDCl_3$ )  $\delta$  174.2, 171.3, 161.3, 138.5, 137.6, 131.0, 127.9, 120.1, 115.3, 94.7, 73.0, 55.6, 53.6. IR (neat,  $cm^{-1}$ ) 3442, 1705, 1591, 1489, 1396, 1244, 1177, 1101, 1006, 764. HRMS (ESI)  $[M + H]^+$  calcd for  $C_{17}H_{15}INO_4S^+$  455.9761, found 455.9762.

**(3*S*,4*R*)-1-Benzyl-3-hydroxy-4-((4-methoxyphenyl)thio)pyrrolidine-2,5-dione (3ea)**

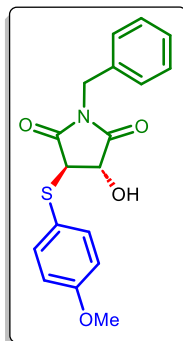

Brown solid (69 mg, 80% yield); m.p. 126–130 °C; purified over a column of silica gel (17% ethyl acetate in hexane);  $^1H$  NMR (500 MHz,  $CDCl_3$ )  $\delta$  7.41 (d,  $J = 8.5$  Hz, 2H), 7.27–7.26 (m, 3H), 7.20–7.18 (m, 2H), 6.73 (d,  $J = 9.0$  Hz, 2H), 4.59 (q,  $J = 14.7$  Hz, 2H), 4.44 (d,  $J = 5.0$  Hz, 1H), 3.81 (d,  $J = 5.0$  Hz, 1H), 3.77 (s, 3H), 3.46 (s, 1H);  $^{13}C\{^1H\}$  NMR (126 MHz,  $CDCl_3$ )  $\delta$  175.4, 172.2, 160.9, 137.4, 135.0, 128.8, 128.7, 128.2, 120.2, 115.1, 72.7, 55.5, 53.6, 42.9. IR (neat,  $cm^{-1}$ ) 3352, 1696, 1589, 1499, 1399, 1242, 1171, 1082, 1023, 817. HRMS (ESI)  $[M + H]^+$  calcd for  $C_{18}H_{18}NO_4S^+$  344.0951, found 344.0951.

**(3*S*,4*R*)-1-(Cyclohexylmethyl)-3-hydroxy-4-((4-methoxyphenyl)thio)pyrrolidine-2,5-dione (3fa)**

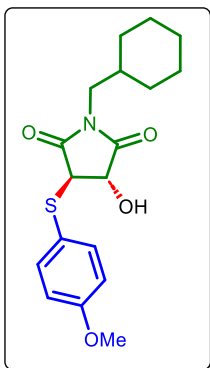

Yellow liquid (68 mg, 78% yield); purified over a column of silica gel (15% ethyl acetate in hexane);  $^1H$  NMR (500 MHz,  $CDCl_3$ )  $\delta$  7.51 (d,  $J = 8.5$  Hz, 2H), 6.85 (d,  $J = 9.0$  Hz, 2H), 4.48–4.46 (m, 1H), 3.80 (d,  $J = 5.5$  Hz, 1H), 3.79 (s, 3H), 3.29 (dd,  $J = 7.3, 2.3$  Hz, 2H), 3.13 (d,  $J = 3.0$  Hz, 1H), 1.62–1.52 (m, 4H), 1.41 (d,  $J = 12.9$  Hz, 1H), 1.31 (d,  $J = 11.5$  Hz, 1H), 1.15–1.06 (m, 3H), 0.87–0.79 (m, 2H);  $^{13}C\{^1H\}$

NMR (126 MHz, CDCl<sub>3</sub>)  $\delta$  175.9, 172.4, 161.1, 137.7, 120.2, 115.1, 72.6, 55.5, 53.7, 45.4, 36.0, 30.6, 30.5, 26.2, 25.7, 25.6. IR (neat, cm<sup>-1</sup>) 3056, 1586, 1483, 1320, 1167, 1011, 975, 692, 677. HRMS (ESI) [M + H]<sup>+</sup> calcd for C<sub>18</sub>H<sub>24</sub>NO<sub>4</sub>S<sup>+</sup> 350.1421, found 350.1422.

**(3*S*,4*R*)-3-Hydroxy-1-(4-methoxybenzyl)-4-((4-methoxyphenyl)thio)pyrrolidine-2,5-dione (3ga)**

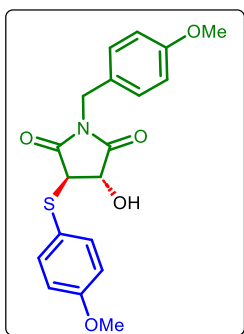

White solid (76 mg, 82% yield); m.p. 112–116 °C; purified over a column of silica gel (20% ethyl acetate in hexane); <sup>1</sup>H NMR (500 MHz, CDCl<sub>3</sub>)  $\delta$  7.40 (d, *J* = 8.5 Hz, 2H), 7.16 (d, *J* = 9.0 Hz, 2H), 6.78 (d, *J* = 8.5 Hz, 2H), 6.73 (d, *J* = 8.5 Hz, 2H), 4.53 (q, *J* = 14.0 Hz, 2H), 4.41 (d, *J* = 4.0 Hz, 1H), 3.79 (d, *J* = 4.0 Hz, 1H), 3.78 (s, 3H), 3.77 (s, 3H), 3.37 (s, 1H); <sup>13</sup>C{<sup>1</sup>H} NMR (126 MHz, CDCl<sub>3</sub>)  $\delta$  175.4, 172.2, 160.9, 159.5, 137.3, 130.3, 127.3, 120.3, 115.1, 114.1, 72.8, 55.42, 55.38, 53.6, 42.4. IR (neat, cm<sup>-1</sup>) 3376, 1708, 1593, 1511, 1395, 1293, 1249, 1175, 1027, 828. HRMS (ESI) [M + H]<sup>+</sup> calcd for C<sub>19</sub>H<sub>20</sub>NO<sub>5</sub>S<sup>+</sup> 374.1057, found. 374.1054.

**(3*S*,4*R*)-3-Hydroxy-4-((4-methoxyphenyl)thio)-1-(3-(trifluoromethyl)benzyl)pyrrolidine-2,5-**

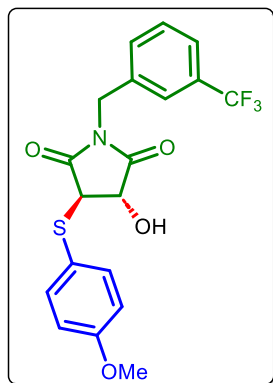

Brown solid (87 mg, 85% yield); m.p. 147–148 °C; purified over a column of silica gel (19% ethyl acetate in hexane); <sup>1</sup>H NMR (500 MHz, CDCl<sub>3</sub>)  $\delta$  7.55 (d, *J* = 5.5 Hz, 2H), 7.42–7.39 (m, 4H), 6.74 (d, *J* = 9.0 Hz, 2H), 4.65 (q, *J* = 13.5 Hz, 2H), 4.47–4.45 (m, 1H), 3.83 (d, *J* = 5.0 Hz, 1H), 3.77 (s, 3H), 3.22 (s, 1H); <sup>13</sup>C{<sup>1</sup>H} NMR (126 MHz, CDCl<sub>3</sub>)  $\delta$  175.0, 172.1, 161.1, 137.4, 135.9, 132.2, 131.3 (d, *J* = 32.4 Hz), 129.4, 125.7 (q, *J* = 21.3 Hz), 125.2 (q, *J* = 3.6 Hz), 122.9, 120.0, 115.1, 72.7, 55.4, 53.6, 42.5. <sup>19</sup>F NMR (471 MHz, CDCl<sub>3</sub>)  $\delta$  -62.6. IR (neat, cm<sup>-1</sup>) 3066, 1588, 1489, 1333, 1166, 1011, 865, 677. HRMS (ESI) [M + H]<sup>+</sup> calcd for C<sub>19</sub>H<sub>17</sub>F<sub>3</sub>NO<sub>4</sub>S<sup>+</sup> 412.0825, found 412.0829.



**(3*S*,4*R*)-1-(2-Fluorobenzyl)-3-hydroxy-4-((4-methoxyphenyl)thio)pyrrolidine-2,5-dione (3ia)**

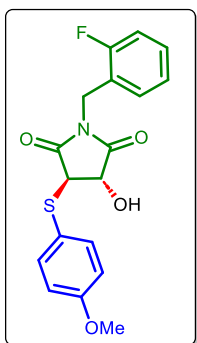

Brown liquid (75 mg, 83% yield); purified over a column of silica gel (18% ethyl acetate in hexane);  $^1\text{H}$  NMR (500 MHz,  $\text{CDCl}_3$ )  $\delta$  7.44 (d,  $J = 9.0$  Hz, 2H), 7.25–7.23 (m, 1H), 7.02–7.01 (m, 2H), 6.77 (d,  $J = 9.0$  Hz, 2H), 6.70 (d,  $J = 1.0$  Hz, 1H), 4.68 (q,  $J = 12.7$  Hz, 2H), 4.48 (d,  $J = 5.0$  Hz, 1H), 3.84 (d,  $J = 5.0$  Hz, 1H), 3.79 (s, 3H), 3.39 (s, 1H);  $^{13}\text{C}\{^1\text{H}\}$  NMR (126 MHz,  $\text{CDCl}_3$ )  $\delta$  175.1, 171.9, 161.0, 137.5, 135.3, 130.1 (d,  $J = 3.5$  Hz), 130.0 (d,  $J = 8.2$  Hz), , 124.3 (d,  $J = 3.7$  Hz), 121.7 (d,  $J = 14.5$  Hz), 120.2, 115.7 (d,  $J = 21.3$  Hz), 115.1, 72.6, 55.5, 53.7, 36.7 (d,  $J = 4.7$  Hz,).  $^{19}\text{F}$  NMR (471 MHz,  $\text{CDCl}_3$ )  $\delta$  -116.9. IR (neat,  $\text{cm}^{-1}$ ) 3414, 1710, 1590, 1492, 1344, 1244, 1170, 1098, 830, 752. HRMS (ESI)  $[\text{M} + \text{H}]^+$  calcd for  $\text{C}_{18}\text{H}_{17}\text{FNO}_4\text{S}^+$  362.0857, found 362.0856.

**(3*S*,4*R*)-3-Hydroxy-4-((4-methoxyphenyl)thio)-1-methylpyrrolidine-2,5-dione (3ja)**

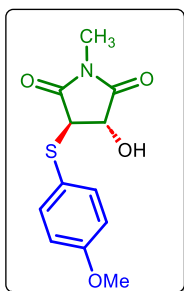

Brown solid (57 mg, 86% yield); m.p. 93–95 °C; purified over a column of silica gel (15% ethyl acetate in hexane);  $^1\text{H}$  NMR (400 MHz,  $\text{CDCl}_3$ )  $\delta$  7.50 (d,  $J = 8.8$  Hz, 2H), 6.86 (d,  $J = 8.8$  Hz, 2H), 4.47 (d,  $J = 4.8$  Hz, 1H), 3.84 (d,  $J = 4.8$  Hz, 1H), 3.80 (s, 3H), 3.44 (s, 1H), 2.95 (s, 3H);  $^{13}\text{C}\{^1\text{H}\}$  NMR (126 MHz,  $\text{CDCl}_3$ )  $\delta$  175.8, 172.7, 161.0, 137.2, 120.5, 115.1, 72.9, 55.5, 53.8, 25.4. IR (neat,  $\text{cm}^{-1}$ ) 3327, 1683, 1590, 1492, 1444, 1285, 1240, 1092, 1029, 776, 629. HRMS (ESI)  $[\text{M} + \text{H}]^+$  calcd for  $\text{C}_{12}\text{H}_{14}\text{NO}_4\text{S}^+$  268.0638, found 268.0634.

**(3*S*,4*R*)-1-Ethyl-3-hydroxy-4-((4-methoxyphenyl)thio)pyrrolidine-2,5-dione (3ka)**

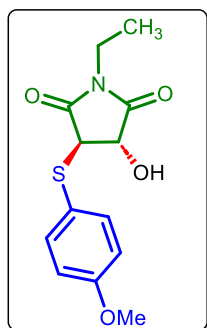

Brown liquid (55 mg, 79% yield); purified over a column of silica gel (16% ethyl acetate in hexane);  $^1\text{H}$  NMR (500 MHz,  $\text{CDCl}_3$ )  $\delta$  7.50 (d,  $J = 9.0$  Hz, 2H), 6.85 (d,  $J = 9.0$  Hz, 2H), 4.45 (d,  $J = 5.0$  Hz, 1H), 3.81 (d,  $J = 5.0$  Hz, 1H), 3.80 (s, 3H), 3.51 (q,  $J = 7.2$  Hz, 2H), 3.45 (s, 1H), 1.07 (t,  $J = 7.3$  Hz, 3H);  $^{13}\text{C}\{^1\text{H}\}$  NMR (126 MHz,  $\text{CDCl}_3$ )  $\delta$  175.6, 172.4, 161.0, 137.3, 120.5,

115.1, 72.9, 55.5, 53.6, 34.4, 12.9. IR (neat,  $\text{cm}^{-1}$ ) 3066, 2967, 1606, 1589, 1473, 1278, 1015, 956, 745, 694. HRMS (ESI)  $[\text{M} + \text{H}]^+$  calcd for  $\text{C}_{13}\text{H}_{16}\text{NO}_4\text{S}^+$  282.0795, found 282.0790.

**(3*S*,4*R*)-3-Hydroxy-1-isobutyl-4-((4-methoxyphenyl)thio)pyrrolidine-2,5-dione (3*la*)**

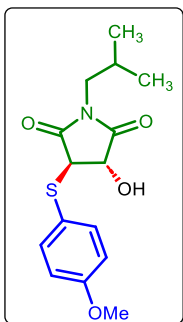

Brown solid (59 mg, 76% yield); m.p. 143–145 °C; purified over a column of silica gel (17% ethyl acetate in hexane);  $^1\text{H}$  NMR (500 MHz,  $\text{CDCl}_3$ )  $\delta$  7.50 (d,  $J = 9.0$  Hz, 2H), 6.85 (d,  $J = 8.5$  Hz, 2H), 4.46 (d,  $J = 5.0$  Hz, 1H), 3.82 (d,  $J = 5.0$  Hz, 1H), 3.79 (s, 3H), 3.28 (s, 1H), 3.27–3.26 (m, 2H), 1.94–1.89 (m, 1H), 0.79 (d,  $J = 6.5$  Hz, 3H), 0.73 (d,  $J = 6.5$  Hz, 3H);  $^{13}\text{C}\{^1\text{H}\}$  NMR (126 MHz,  $\text{CDCl}_3$ )  $\delta$  176.0, 172.5, 161.1, 137.6, 120.4, 115.1, 72.6, 55.5, 53.7, 46.6, 27.1, 20.0, 19.9. IR (neat,  $\text{cm}^{-1}$ ) 3120, 1567, 1484, 1446, 1335, 1226, 1098, 975, 742, 699. HRMS (ESI)  $[\text{M} + \text{H}]^+$  calcd for  $\text{C}_{15}\text{H}_{20}\text{NO}_4\text{S}^+$  310.1108, found 310.1107.

**(3*S*,4*R*)-3-Hydroxy-1-isopentyl-4-((4-methoxyphenyl)thio)pyrrolidine-2,5-dione (3*ma*)**

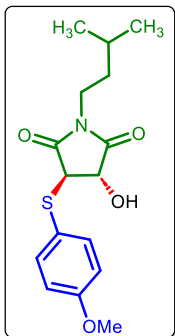

Brown solid (60 mg, 74% yield); m.p. 165–169 °C; purified over a column of silica gel (16% ethyl acetate in hexane);  $^1\text{H}$  NMR (500 MHz,  $\text{CDCl}_3$ )  $\delta$  7.50 (d,  $J = 8.5$  Hz, 2H), 6.85 (d,  $J = 9.0$  Hz, 2H), 4.46 (d,  $J = 4.5$  Hz, 1H), 3.80 (d,  $J = 4.5$  Hz, 1H), 3.79 (s, 3H), 3.53 (s, 1H), 3.46 (t,  $J = 7.5$  Hz, 2H), 1.41–1.35 (m, 1H), 1.34–1.28 (m, 2H), 0.88 (d,  $J = 3.5$  Hz, 3H), 0.87 (d,  $J = 3.5$  Hz, 3H);  $^{13}\text{C}\{^1\text{H}\}$  NMR (126 MHz,  $\text{CDCl}_3$ )  $\delta$  175.7, 172.4, 161.0, 137.5, 120.5, 115.1, 72.9, 55.5, 53.7, 37.9, 36.3, 25.9, 22.35, 22.34. IR (neat,  $\text{cm}^{-1}$ ) 3137, 1581, 1478, 1388, 1336, 1101, 976, 896, 711, 698. HRMS (ESI)  $[\text{M} + \text{H}]^+$  calcd for  $\text{C}_{16}\text{H}_{22}\text{NO}_4\text{S}^+$  324.1264, found. 324.1268.

**(3*S*,4*R*)-1-Hexyl-3-hydroxy-4-((4-methoxyphenyl)thio)pyrrolidine-2,5-dione (3*na*)**

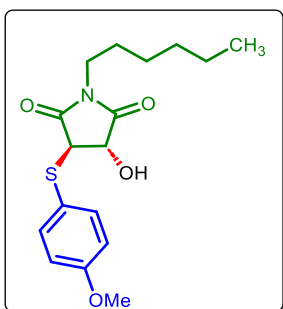

Brown liquid (63 mg, 75% yield); purified over a column of silica gel (15% ethyl acetate in hexane);  $^1\text{H}$  NMR (500 MHz,  $\text{CDCl}_3$ )  $\delta$  7.50 (d,  $J = 9.0$  Hz, 2H), 6.85 (d,  $J = 9.0$  Hz, 2H), 4.46–4.44 (m, 1H),

3.81–3.80 (m, 1H), 3.79 (s, 3H), 3.44 (t,  $J = 7.3$  Hz, 2H), 3.19 (s, 1H), 1.47–1.40 (m, 2H), 1.27–1.20 (m, 4H), 1.17–1.12 (m, 2H), 0.87 (t,  $J = 6.7$  Hz, 3H);  $^{13}\text{C}\{^1\text{H}\}$  NMR (126 MHz,  $\text{CDCl}_3$ )  $\delta$  175.7, 172.4, 161.1, 137.5, 120.4, 115.1, 72.8, 55.5, 53.7, 39.5, 31.4, 27.6, 26.4, 22.6, 14.1. IR (neat,  $\text{cm}^{-1}$ ) 3419, 1701, 1589, 1492, 1398, 1289, 1174, 1026, 829, 632. HRMS (ESI)  $[\text{M} + \text{H}]^+$  calcd for  $\text{C}_{17}\text{H}_{24}\text{NO}_4\text{S}^+$  338.1421, found 338.1418.

**(3*S*,4*R*)-1-Heptyl-3-hydroxy-4-((4-methoxyphenyl)thio)pyrrolidine-2,5-dione (3oa)**

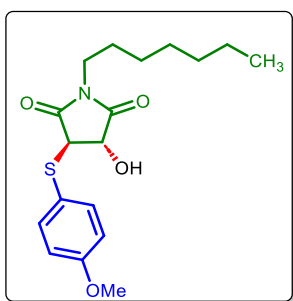

Brown liquid (75 mg, 85% yield); purified over a column of silica gel (18% ethyl acetate in hexane);  $^1\text{H}$  NMR (500 MHz,  $\text{CDCl}_3$ )  $\delta$  7.50 (d,  $J = 8.5$  Hz, 2H), 6.85 (d,  $J = 8.5$  Hz, 2H), 4.45 (d,  $J = 2.5$  Hz, 1H), 3.80 (d,  $J = 2.5$  Hz, 1H), 3.79 (s, 3H), 3.44 (t,  $J = 7.5$  Hz, 2H), 3.25 (s, 1H), 1.48–1.41 (m, 2H), 1.31–1.21 (m, 6H), 1.16–1.10 (m, 2H), 0.87 (t,  $J = 7.0$  Hz, 3H);  $^{13}\text{C}\{^1\text{H}\}$  NMR (126 MHz,  $\text{CDCl}_3$ )  $\delta$  175.7, 172.4, 161.0, 137.5, 120.4, 115.1, 72.8, 55.5, 53.7, 39.5, 31.8, 28.9, 27.6, 26.7, 22.7, 14.2. IR (neat,  $\text{cm}^{-1}$ ) 3157, 1581, 1485, 1454, 1236, 1087, 1044, 934, 747, 697. HRMS (ESI)  $[\text{M} + \text{H}]^+$  calcd for  $\text{C}_{18}\text{H}_{26}\text{NO}_4\text{S}^+$  352.1577, found 352.1571.

**(3*S*,4*R*)-3-Hydroxy-4-((4-methoxyphenyl)thio)-1-octylpyrrolidine-2,5-dione (3pa)**

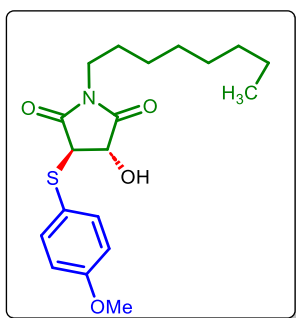

Brown liquid (81 mg, 89% yield); purified over a column of silica gel (18% ethyl acetate in hexane);  $^1\text{H}$  NMR (500 MHz,  $\text{CDCl}_3$ )  $\delta$  7.50 (d,  $J = 9.0$  Hz, 2H), 6.85 (d,  $J = 8.5$  Hz, 2H), 4.45 (d,  $J = 3.0$  Hz, 1H), 3.80 (d,  $J = 3.0$  Hz, 1H), 3.79 (s, 3H), 3.44 (t,  $J = 7.3$  Hz, 2H), 3.31 (s, 1H), 1.47–1.40 (m, 2H), 1.30–1.21 (m, 8H), 1.16–1.10 (m, 2H), 0.88 (t,  $J = 7.0$  Hz, 3H);  $^{13}\text{C}\{^1\text{H}\}$  NMR (126 MHz,  $\text{CDCl}_3$ )  $\delta$  175.8, 172.5, 161.0, 137.4, 120.4, 115.1, 72.8, 55.5, 53.7, 39.5, 31.9, 29.22, 29.17, 27.6, 26.8, 22.7, 14.2. IR (neat,  $\text{cm}^{-1}$ ) 3419, 1702, 1591, 1492, 1398, 1246, 1172, 1030, 830, 632. HRMS (ESI)  $[\text{M} + \text{H}]^+$  calcd for  $\text{C}_{19}\text{H}_{28}\text{NO}_4\text{S}^+$  366.1734, found 366.1734.

**(3*S*,4*R*)-1-Decyl-3-hydroxy-4-((4-methoxyphenyl)thio)pyrrolidine-2,5-dione (3qa)**

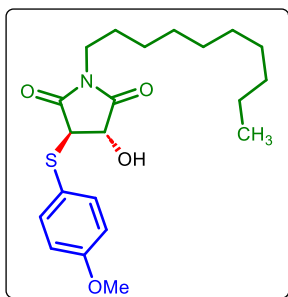

Brown liquid (76 mg, 77% yield); purified over a column of silica gel (17% ethyl acetate in hexane);  $^1\text{H}$  NMR (400 MHz,  $\text{CDCl}_3$ )  $\delta$  7.50 (d,  $J = 8.8$  Hz, 2H), 6.85 (d,  $J = 8.8$  Hz, 2H), 4.45 (d,  $J = 4.4$  Hz, 1H), 3.80 (d,  $J = 3.0$  Hz, 1H), 3.78 (s, 3H), 3.44 (t,  $J = 7.4$  Hz, 2H), 3.20 (s, 1H), 1.46–1.42 (m, 2H), 1.29–1.20 (m, 12H), 1.17–1.12 (m, 2H), 0.88 (t,  $J = 6.8$  Hz, 3H);  $^{13}\text{C}\{^1\text{H}\}$  NMR (126 MHz,  $\text{CDCl}_3$ )  $\delta$  175.7, 172.4, 161.0, 137.4, 120.4, 115.1, 72.8, 55.5, 53.7, 39.5, 32.0, 29.7, 29.6, 29.4, 29.2, 27.6, 26.8, 22.8, 14.3. IR (neat,  $\text{cm}^{-1}$ ) 3421, 1702, 1591, 1492, 1399, 1246, 1173, 1030, 829, 632. HRMS (ESI)  $[\text{M} + \text{H}]^+$  calcd for  $\text{C}_{21}\text{H}_{32}\text{NO}_4\text{S}^+$  394.2047, found 394.2049.

**(3*S*,4*R*)-3-Hydroxy-4-((4-methoxyphenyl)thio)pyrrolidine-2,5-dione (3ra)**

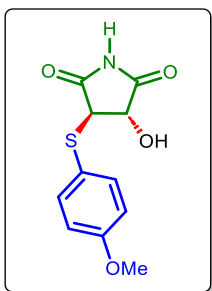

Brown liquid (54 mg, 85% yield); purified over a column of silica gel (20% ethyl acetate in hexane);  $^1\text{H}$  NMR (500 MHz,  $\text{CDCl}_3$ )  $\delta$  8.11 (s, 1H), 7.52 (d,  $J = 9.0$  Hz, 2H), 6.87 (d,  $J = 9.0$  Hz, 2H), 4.48 (d,  $J = 6.0$  Hz, 1H), 3.89 (d,  $J = 5.5$  Hz, 1H), 3.81 (s, 3H), 3.30 (s, 1H);  $^{13}\text{C}\{^1\text{H}\}$  NMR (126 MHz,  $\text{CDCl}_3$ )  $\delta$  175.1, 171.8, 161.1, 137.4, 135.3, 115.3, 73.5, 55.5, 54.9. IR (neat,  $\text{cm}^{-1}$ ) 3241, 2933, 1608, 1488, 1429, 1291, 1181, 1012, 930, 759. HRMS (ESI)  $[\text{M} + \text{H}]^+$  calcd for  $\text{C}_{11}\text{H}_{12}\text{NO}_4\text{S}^+$  254.0482, found 254.0483.

**3-Hydroxy-4-((4-methoxyphenyl)thio)-1-(4-phenylbutan-2-yl)pyrrolidine-2,5-dione (3sa)**

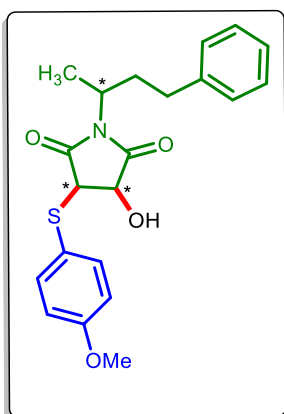

Light yellow solid (75 mg, 78% yield); dr 1:0.87; m.p. 100-104  $^\circ\text{C}$ ; purified over a column of silica gel (17% ethyl acetate in hexane);  $^1\text{H}$  NMR (500 MHz,  $\text{CDCl}_3$ )  $\delta$  7.49 (d,  $J = 8.0$  Hz, 4H), 7.25–7.23 (m, 4H), 7.19–7.14 (m, 2H), 7.07 (t,  $J = 8.0$  Hz, 4H), 6.81 (d,  $J = 8.5$  Hz, 4H), 4.31–4.27 (m, 2H), 4.22–4.15 (m, 2H), 3.71 (s, 3H), 3.67 (s, 3H), 3.63 (d,  $J = 5.5$  Hz, 1H), 3.57 (d,  $J = 5.5$  Hz, 1H), 3.26–3.23 (m, 2H),

2.48–2.43 (m, 2H), 2.38 – 2.14 (m, 4H), 1.91–1.83 (m, 2H), 1.30 (d,  $J = 7.0$  Hz, 3H), 1.27 (d,  $J = 7.0$  Hz, 3H);  $^{13}\text{C}\{^1\text{H}\}$  NMR (126 MHz,  $\text{CDCl}_3$ )  $\delta$  175.87, 175.86, 172.4, 160.99, 160.97, 141.0, 140.9, 137.5, 137.4, 128.6, 128.5, 128.4, 126.22, 126.19, 120.6, 120.5, 115.07, 115.06, 72.31, 72.27, 55.44, 55.36, 53.64, 53.62, 49.2, 49.0, 33.9, 33.8, 33.2, 33.0, 18.2, 18.0. IR (neat,  $\text{cm}^{-1}$ ) 3385, 1689, 1590, 1491, 1367, 1246, 1166, 1028, 826, 699. HRMS (ESI)  $[\text{M} + \text{H}]^+$  calcd for  $\text{C}_{21}\text{H}_{24}\text{NO}_4\text{S}^+$  386.1421, found 386.1425.

**(3*S*,4*R*)-3-Hydroxy-4-((4-methoxyphenyl)thio)-1-(4-phenylbutyl)pyrrolidine-2,5-dione (3ta)**

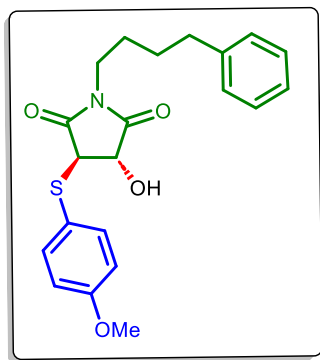

Brown liquid (83 mg, 86% yield); purified over a column of silica gel (17% ethyl acetate in hexane);  $^1\text{H}$  NMR (500 MHz,  $\text{CDCl}_3$ )  $\delta$  7.48 (d,  $J = 9.0$  Hz, 2H), 7.27 (t,  $J = 6.8$  Hz, 2H), 7.18 (t,  $J = 7.5$  Hz, 1H), 7.13 (d,  $J = 7.5$  Hz, 2H), 6.79 (d,  $J = 9.0$  Hz, 2H), 4.44 (d,  $J = 5.5$  Hz, 1H), 3.80 (d,  $J = 5.5$  Hz, 1H), 3.75 (s, 3H), 3.71 (s, 1H), 3.46 (t,  $J = 6.5$  Hz, 2H), 2.56 (t,  $J = 7.0$  Hz, 2H), 1.50–1.49 (m, 4H);  $^{13}\text{C}\{^1\text{H}\}$  NMR (126 MHz,  $\text{CDCl}_3$ )  $\delta$  175.9, 172.5, 161.0, 141.8, 137.4, 128.5, 126.0, 120.3, 115.1, 72.6, 55.5, 53.7, 39.1, 35.2, 28.4, 27.1. IR (neat,  $\text{cm}^{-1}$ ) 3420, 1700, 1591, 1492, 1396, 1245, 1146, 1029, 829, 740. HRMS (ESI)  $[\text{M} + \text{H}]^+$  calcd for  $\text{C}_{21}\text{H}_{24}\text{NO}_4\text{S}$  386.1421, found 386.1427.

**(3*S*,4*R*)-3-Hydroxy-4-((4-methoxyphenyl)thio)-1-phenethylpyrrolidine-2,5-dione (3ua)**

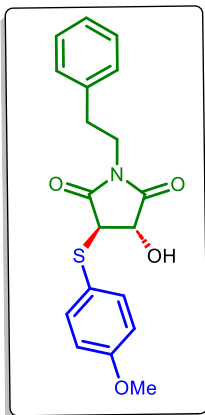

Brown solid (80 mg, 89% yield); m.p. 153–155 °C; purified over a column of silica gel (17% ethyl acetate in hexane);  $^1\text{H}$  NMR (500 MHz,  $\text{CDCl}_3$ )  $\delta$  7.50 (d,  $J = 9.0$  Hz, 2H), 7.25–7.20 (m, 3H), 7.08 (d,  $J = 6.5$  Hz, 2H), 6.86 (d,  $J = 8.5$  Hz, 2H), 4.37 (d,  $J = 3.0$  Hz, 1H), 3.79 (s, 3H), 3.76 (d,  $J = 5.5$  Hz, 1H), 3.69 (t,  $J = 7.6$  Hz, 2H), 3.33 (s, 1H), 2.83–2.73 (m, 2H);  $^{13}\text{C}\{^1\text{H}\}$  NMR (126 MHz,  $\text{CDCl}_3$ )  $\delta$  175.5, 172.2, 161.1, 137.44, 137.37, 128.9, 128.7, 127.0, 120.5, 115.1, 72.6, 55.5, 53.7, 40.5, 33.5. IR (neat,  $\text{cm}^{-1}$ ) 3078, 1681, 1508, 1336, 1287,

1156, 1114, 984, 835, 756, 685. HRMS (ESI)  $[M + H]^+$  calcd for  $C_{19}H_{20}NO_4S^+$  358.1108, found 358.1107.

**(3*S*,4*R*)-3-Hydroxy-4-((4-methoxyphenyl)thio)-1-(2-(thiophen-2-yl)ethyl)pyrrolidine-2,5-dione**

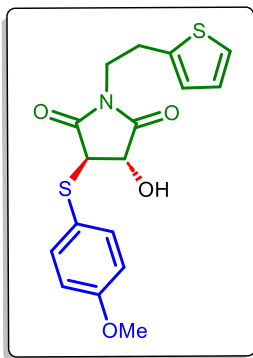

Brown solid (73 mg, 81% yield); m.p. 120–124 °C; purified over a column of silica gel (18% ethyl acetate in hexane);  $^1H$  NMR (400 MHz,  $CDCl_3$ )  $\delta$  7.50 (d,  $J = 8.8$  Hz, 2H), 7.13 (dd,  $J = 4.8, 1.2$  Hz, 1H), 6.90–6.87 (m, 1H), 6.86 (d,  $J = 8.4$  Hz, 2H), 6.70 (d,  $J = 2.8$  Hz, 1H), 4.41 (d,  $J = 4.0$  Hz, 1H), 3.80 (s, 3H), 3.78 (d,  $J = 4.0$  Hz, 1H), 3.72 (t,  $J = 7.2$  Hz, 2H), 3.11 (s, 1H), 3.05–3.00 (m, 2H);  $^{13}C\{^1H\}$  NMR (126 MHz,  $CDCl_3$ )  $\delta$  175.3, 172.1, 161.1, 139.3, 137.4, 127.2, 126.0, 124.5, 120.5, 115.2, 72.7, 55.5, 53.8, 40.6, 27.5. IR (neat,  $cm^{-1}$ ) 3317, 2965, 1600, 1511, 1478, 1370, 1264, 964, 746, 681. HRMS (ESI)  $[M + H]^+$  calcd for  $C_{17}H_{18}NO_4S_2^+$  364.0672, found 364.0675.

**(3*S*,4*R*)-3-Hydroxy-1-phenyl-4-(phenylthio)pyrrolidine-2,5-dione (3*ab*)**

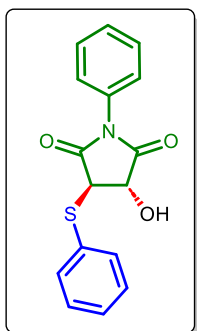

White solid (42 mg, 56% yield); m.p. 148–151 °C; purified over a column of silica gel (15% ethyl acetate in hexane);  $^1H$  NMR (500 MHz,  $CDCl_3$ )  $\delta$  7.64–7.62 (m, 3H), 7.46 (t,  $J = 7.5$  Hz, 2H), 7.40–7.37 (m, 4H), 7.19–7.17 (m, 1H), 4.66–4.65 (m, 1H), 4.13 (d,  $J = 5.5$  Hz, 1H), 3.30 (s, 1H);  $^{13}C\{^1H\}$  NMR (126 MHz,  $CDCl_3$ )  $\delta$  174.6, 171.5, 134.6, 129.7, 129.5, 129.42, 129.41, 129.2, 126.3, 125.6, 119.9, 73.4, 53.3. IR (neat,  $cm^{-1}$ ) 3172, 1476, 1461, 1239, 1166, 1037, 968, 637. HRMS (ESI)  $[M + H]^+$  calcd for  $C_{16}H_{14}NO_3S^+$  300.0689, found 300.0710.

**(3*S*,4*R*)-3-Hydroxy-1-phenyl-4-(*p*-tolylthio)pyrrolidine-2,5-dione (3ac)**

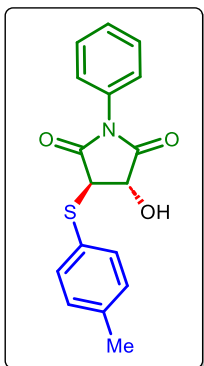

White solid (56 mg, 71% yield); m.p. 141–148 °C; purified over a column of silica gel (16% ethyl acetate in hexane); <sup>1</sup>H NMR (500 MHz, CDCl<sub>3</sub>) δ 7.50 (d, *J* = 7.5 Hz, 2H), 7.45 (t, *J* = 7.5 Hz, 2H), 7.41 (d, *J* = 7.5 Hz, 1H), 7.18–7.15 (m, 4H), 4.63 (d, *J* = 5.0 Hz, 1H), 4.05 (d, *J* = 5.5 Hz, 1H), 3.36 (s, 1H), 2.36 (s, 3H); <sup>13</sup>C{<sup>1</sup>H} NMR (126 MHz, CDCl<sub>3</sub>) δ 174.7, 171.6, 140.1, 135.2, 131.3, 130.5, 129.4, 129.2, 126.7, 126.3, 73.1, 53.4, 21.4. IR (neat, cm<sup>-1</sup>) 3372, 1676, 1351, 1320, 1208, 1026, 928, 738, 655. HRMS (ESI) [M + H]<sup>+</sup> calcd for C<sub>17</sub>H<sub>16</sub>NO<sub>3</sub>S<sup>+</sup> 314.0845, found 314.0851.

**(3*R*,4*S*)-3-((4-Chlorophenyl)thio)-4-hydroxy-1-phenylpyrrolidine-2,5-dione (3ad)**

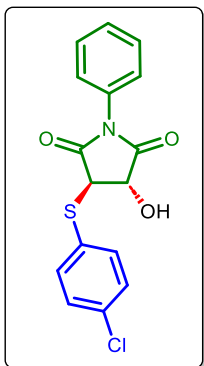

White solid (58 mg, 70% yield); m.p. 156–159 °C; purified over a column of silica gel (19% ethyl acetate in hexane); <sup>1</sup>H NMR (400 MHz, CDCl<sub>3</sub>) δ 7.57 (d, *J* = 8.4 Hz, 2H), 7.47–.46 (m, 2H), 7.44–7.41 (m, 1H), 7.34 (d, *J* = 8.4 Hz, 2H), 7.21 (d, *J* = 7.2 Hz, 2H), 4.63 (d, *J* = 5.6 Hz, 1H), 4.12 (d, *J* = 5.6 Hz, 1H), 3.43 (s, 1H); <sup>13</sup>C{<sup>1</sup>H} NMR (126 MHz, CDCl<sub>3</sub>) δ 174.4, 171.3, 135.9, 135.7, 131.1, 129.8, 129.5, 129.4, 129.3, 126.2, 73.3, 53.5. IR (neat, cm<sup>-1</sup>) 3072, 1676, 1651, 1369, 1158, 1028, 938, 688, 599. HRMS (ESI) [M + H]<sup>+</sup> calcd for C<sub>16</sub>H<sub>13</sub>ClNO<sub>3</sub>S<sup>+</sup> 334.0305, found 334.0303.

**(3*R*,4*S*)-3-((3-Fluoro-4-methoxyphenyl)thio)-4-hydroxy-1-phenylpyrrolidine-2,5-dione (3ae)**

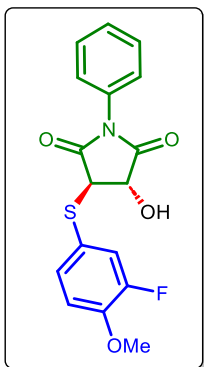

White solid (67 mg, 77% yield); m.p. 149–154 °C; purified over a column of silica gel (23% ethyl acetate in hexane); <sup>1</sup>H NMR (500 MHz, CDCl<sub>3</sub>) δ 7.47 (t, *J* = 7.5 Hz, 2H), 7.42–7.38 (m, 3H), 7.20 (d, *J* = 7.5 Hz, 2H), 6.94 (t, *J* = 9.0 Hz, 1H), 4.61 (d, *J* = 5.0 Hz, 1H), 4.03 (d, *J* = 5.0 Hz, 1H), 3.90 (s, 3H), 3.37 (s, 1H); <sup>13</sup>C{<sup>1</sup>H} NMR (126 MHz, CDCl<sub>3</sub>) δ 174.5, 171.4, 149.5 (d, *J* = 10.3 Hz), 132.2 (d, *J* = 3.7 Hz), 131.2, 129.5, 129.31, 129.27, 126.2, 123.1 (d, *J* = 18.5 Hz), 121.3 (d, *J* = 6.7 Hz), 113.9 (d, *J* = 2.3 Hz), 72.9, 56.4, 53.8. <sup>19</sup>F NMR (471

MHz, CDCl<sub>3</sub>)  $\delta$  -132.4. IR (neat, cm<sup>-1</sup>) 3172, 1523, 1445, 1329, 1165, 1127, 858, 738, 635. HRMS (ESI) [M + H]<sup>+</sup> calcd for C<sub>17</sub>H<sub>15</sub>FNO<sub>4</sub>S<sup>+</sup> 348.0700, found 348.0696.

**3-((4-Methoxyphenyl)thio)-1-phenylpyrrolidine-2,5-dione (6aa)**

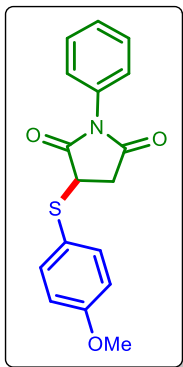

Brown liquid (58 mg, 75% yield; purified over a column of silica gel (11% ethyl acetate in hexane); <sup>1</sup>H NMR (500 MHz, CDCl<sub>3</sub>)  $\delta$  7.51 (d, *J* = 8.5 Hz, 2H), 7.44–7.41 (m, 2H), 7.37 (d, *J* = 7.5 Hz, 1H), 7.04 (d, *J* = 7.5 Hz, 2H), 6.88 (d, *J* = 9.0 Hz, 2H), 4.03 (dd, *J* = 9.5, 3.5 Hz, 1H), 3.81 (s, 3H), 3.31 (q, *J* = 9 Hz, 1H), 2.90 (dd, *J* = 19.0, 3.5 Hz, 1H); <sup>13</sup>C{<sup>1</sup>H} NMR (126 MHz, CDCl<sub>3</sub>)  $\delta$  174.8, 173.8, 161.4, 137.9, 131.7, 129.3, 128.9, 126.5, 119.7, 115.2, 55.6, 44.7, 36.4. IR (neat, cm<sup>-1</sup>) 3163, 1514, 1455, 1314, 1115, 1107, 755, 631, 601. HRMS (ESI) [M + H]<sup>+</sup> calcd for C<sub>17</sub>H<sub>16</sub>NO<sub>3</sub>S<sup>+</sup> 314.0845, found 314.0844.



## 10. NMR Spectra

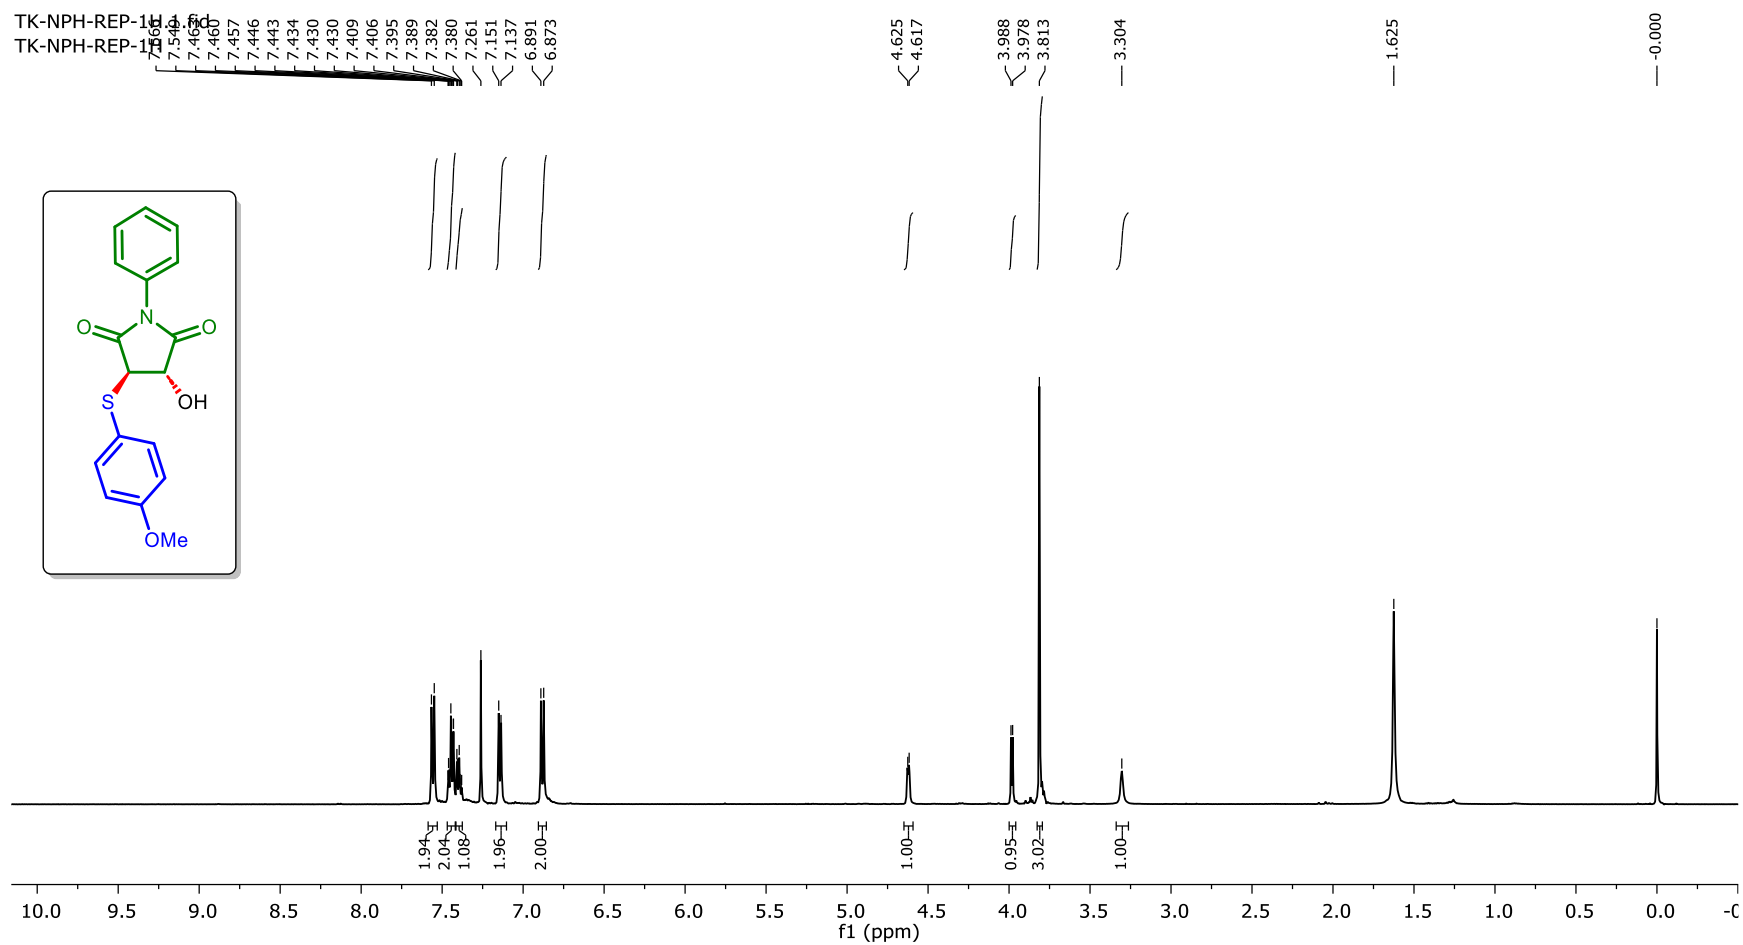

**(3*S*,4*R*)-3-Hydroxy-4-((4-methoxyphenyl)thio)-1-phenylpyrrolidine-2,5-dione (3aa): <sup>1</sup>H NMR (CDCl<sub>3</sub>, 500 MHz)**

TK-NPH-REP-13001  
TK-NPH-REP-13001

174.681  
171.644

161.224

137.641

131.268

129.382

129.186

126.284

120.265

115.229

77.414

77.100

76.906

72.923

55.565

53.693

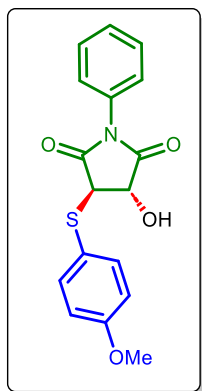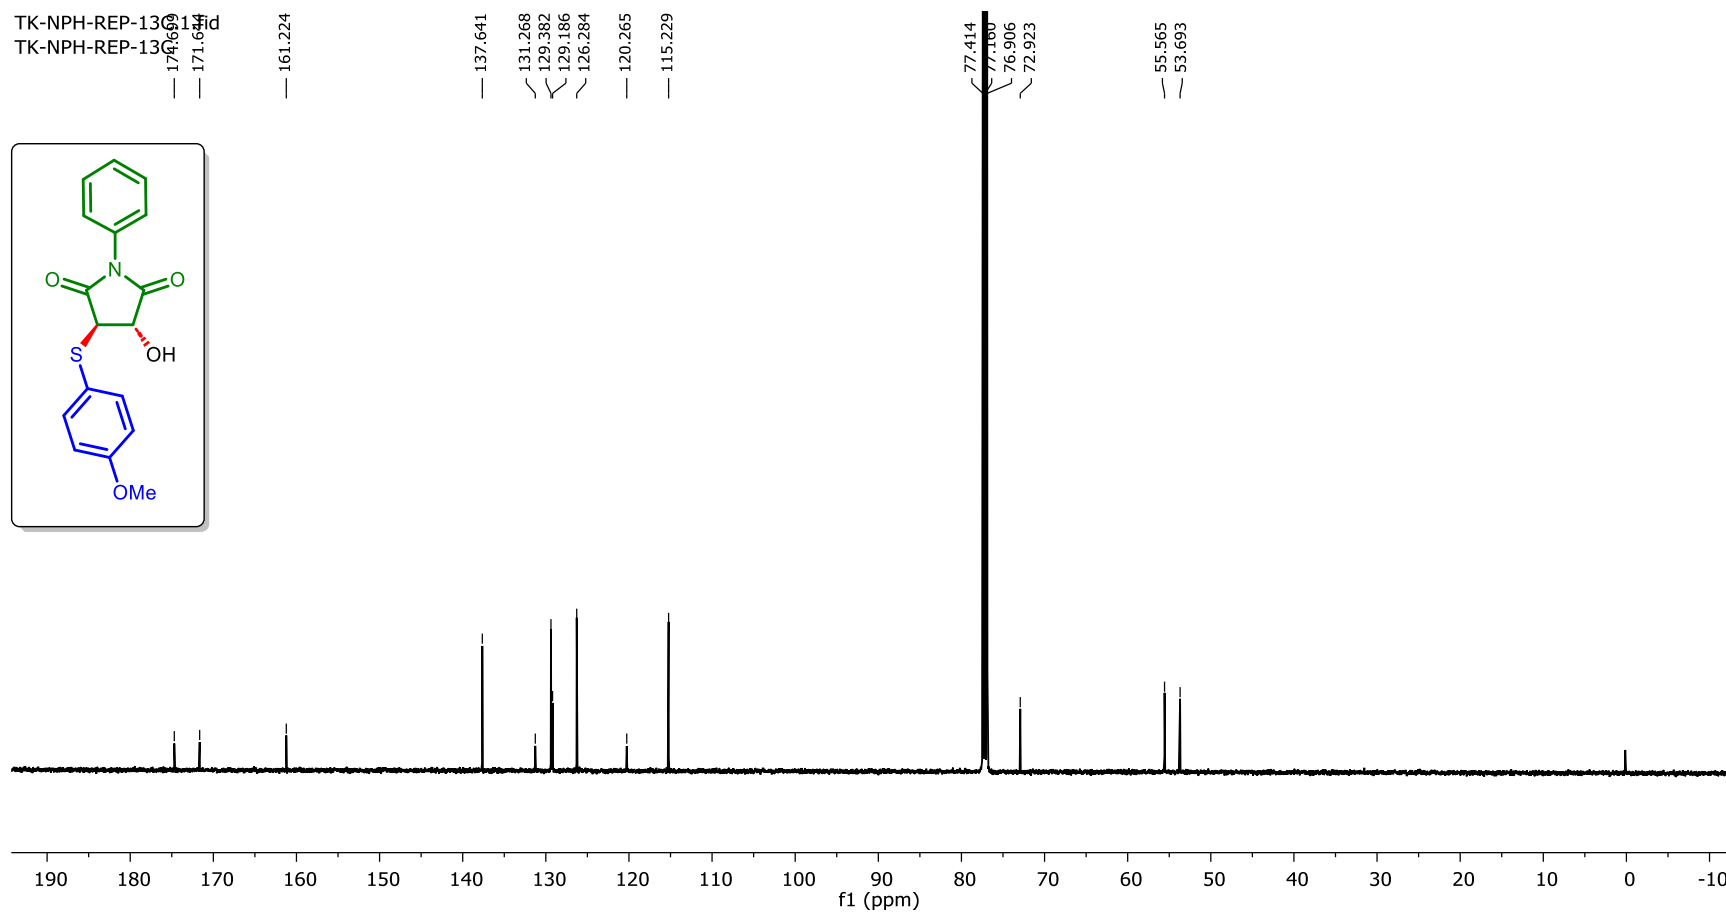

**(3*S*,4*R*)-3-Hydroxy-4-((4-methoxyphenyl)thio)-1-phenylpyrrolidine-2,5-dione (3aa):  $^{13}\text{C}\{^1\text{H}\}$  NMR ( $\text{CDCl}_3$ , 126 MHz)**

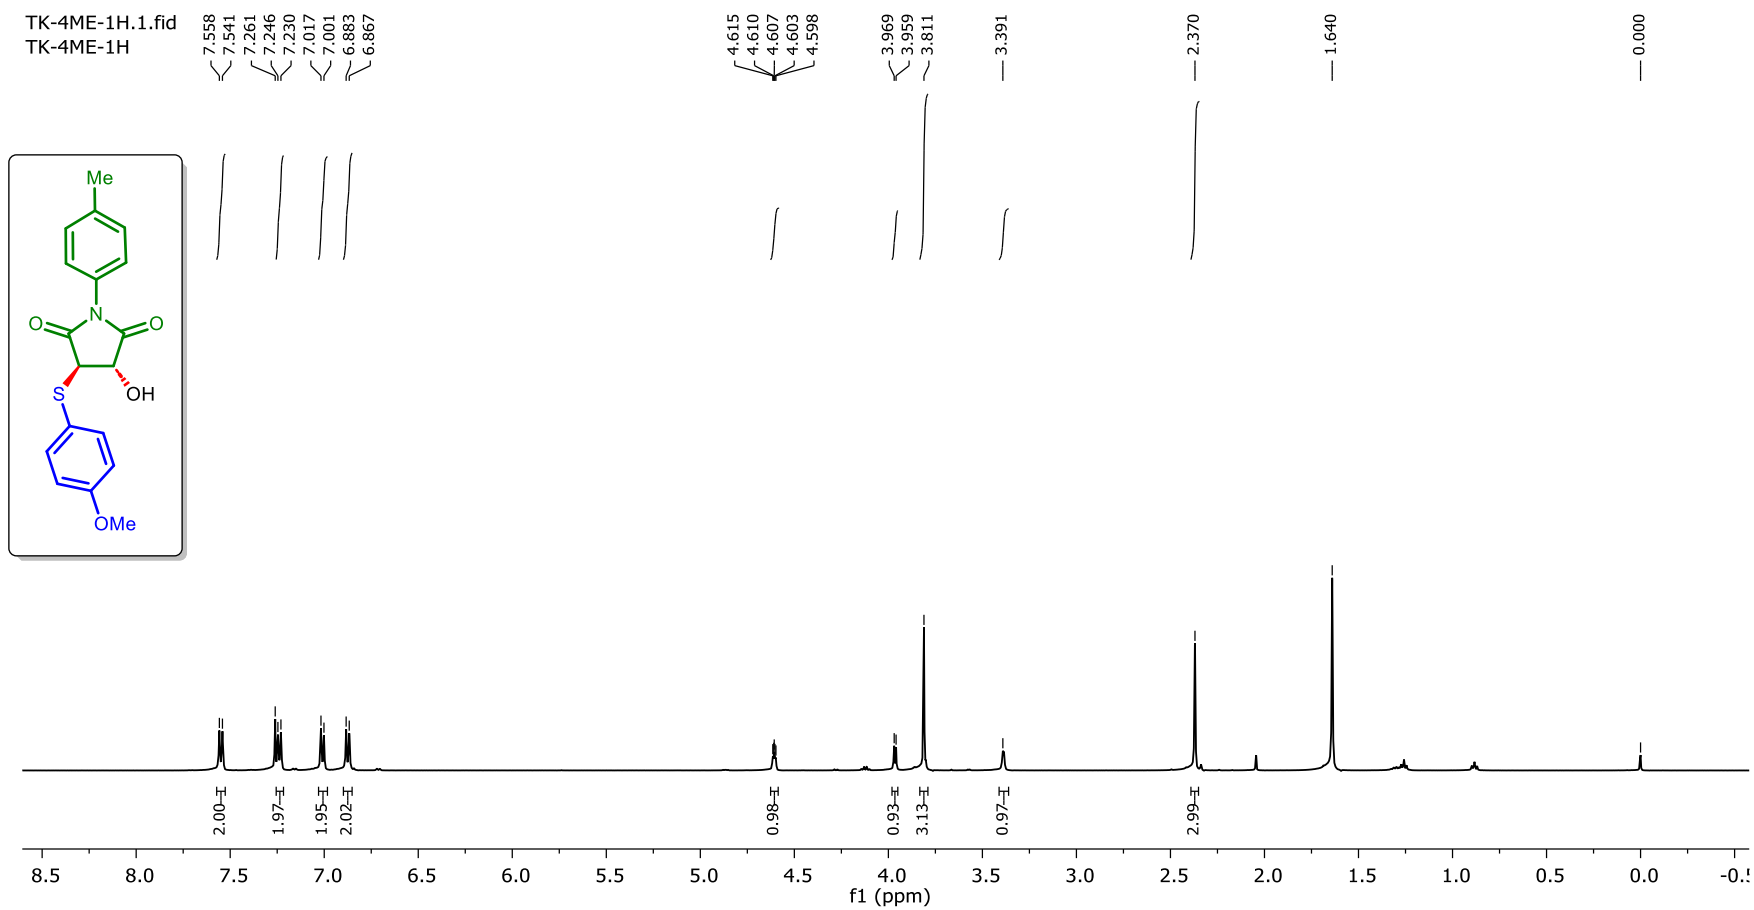

**(3*S*,4*R*)-3-Hydroxy-4-((4-methoxyphenyl)thio)-1-(*p*-tolyl)pyrrolidine-2,5-dione (3ba): <sup>1</sup>H NMR (CDCl<sub>3</sub>, 500 MHz)**

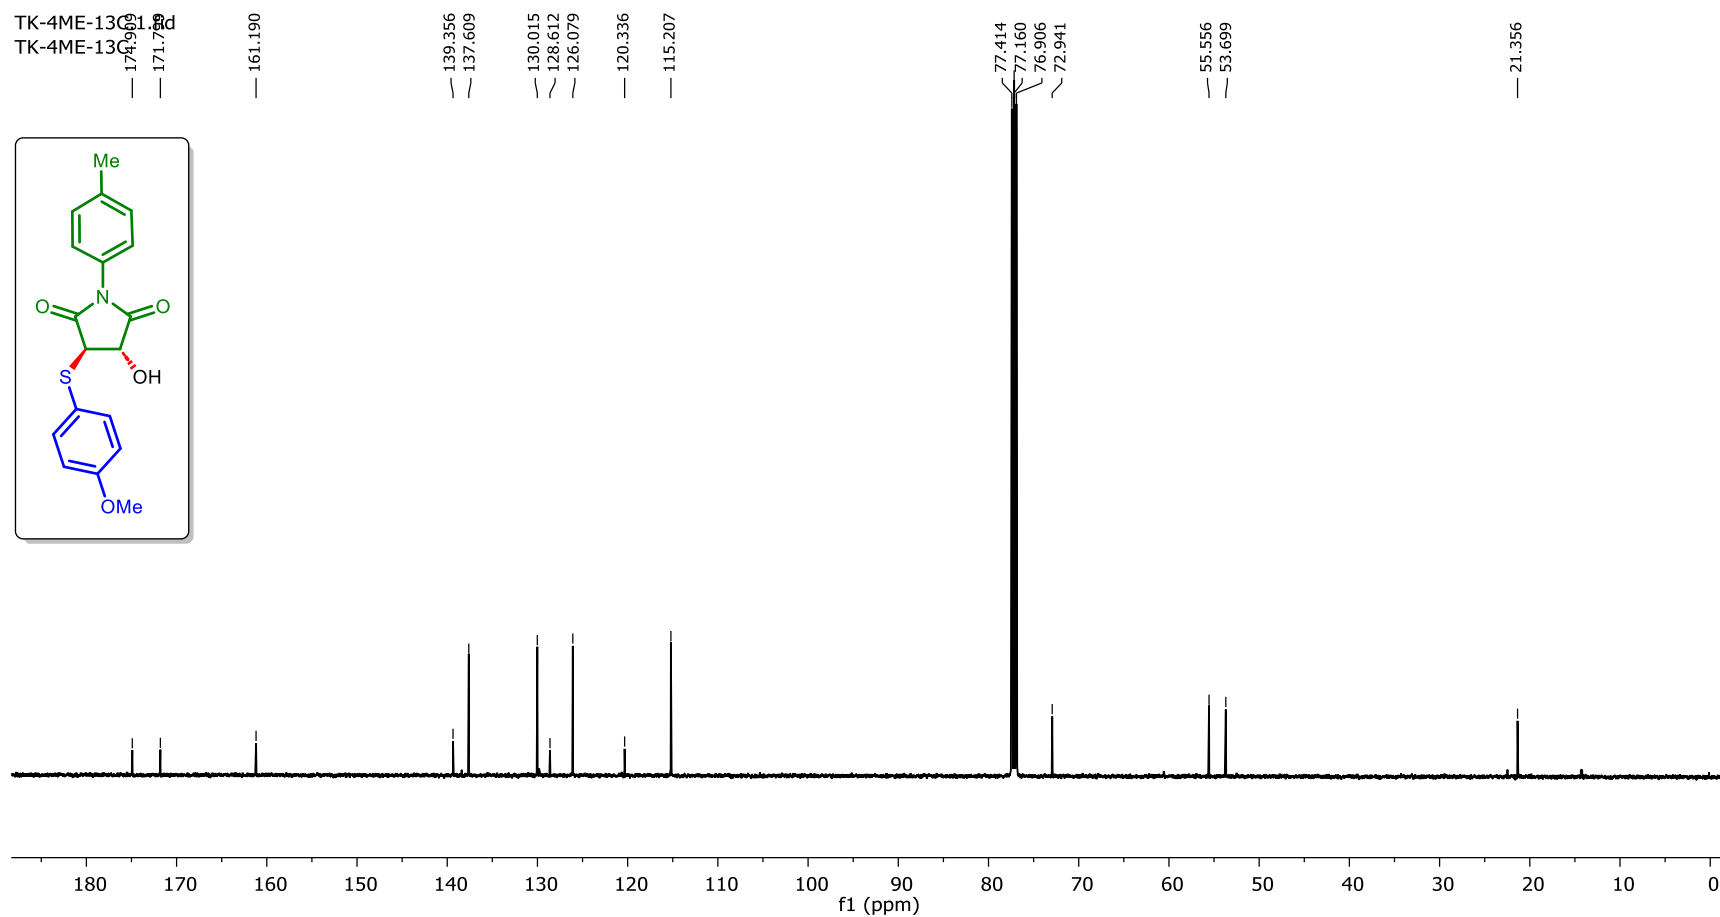

**(3S,4R)-3-Hydroxy-4-((4-methoxyphenyl)thio)-1-(p-tolyl)pyrrolidine-2,5-dione (3ba):  $^{13}\text{C}\{^1\text{H}\}$  NMR ( $\text{CDCl}_3$ , 126 MHz)**

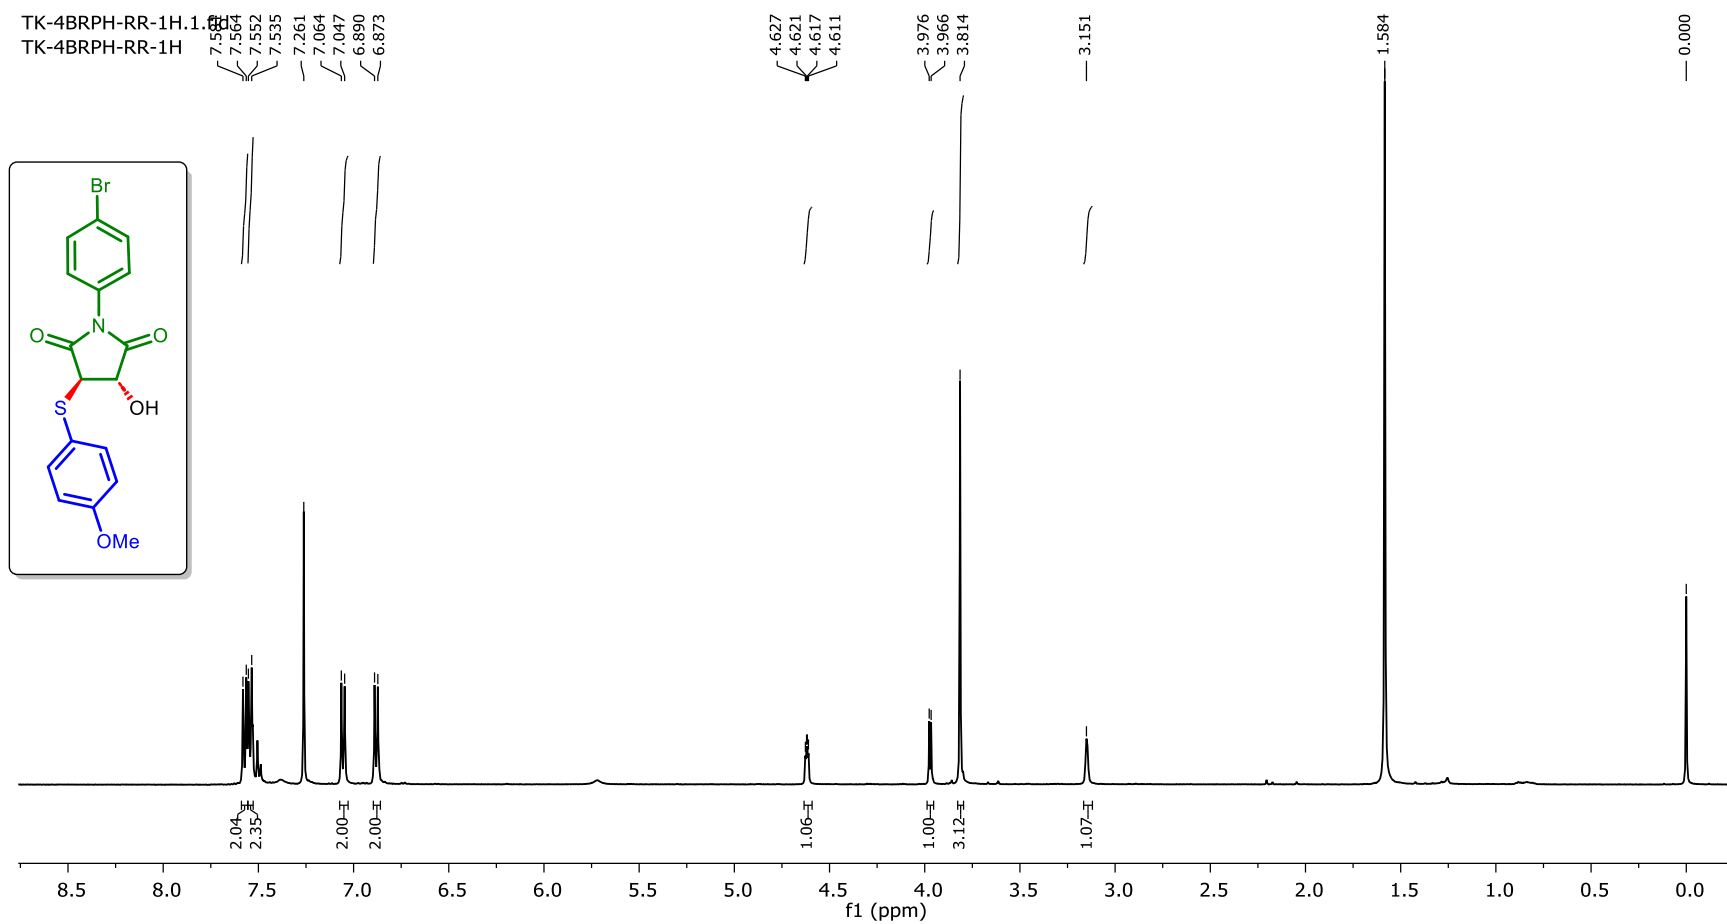

**(3*S*,4*R*)-1-(4-Bromophenyl)-3-hydroxy-4-((4-methoxyphenyl)thio)pyrrolidine-2,5-dione (3ca): <sup>1</sup>H NMR (CDCl<sub>3</sub>, 500 MHz)**

PP-4BRPH-RR-13C.2.fig  
PP-4BRPH-RR-13C

— 174.245  
— 171.330

— 161.294

— 137.644  
— 132.572  
— 132.451  
— 130.232  
— 127.737  
— 123.086  
— 121.399  
— 120.122  
— 115.264

77.414  
77.100  
76.906  
72.971

— 55.583  
— 53.621

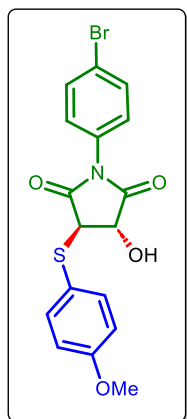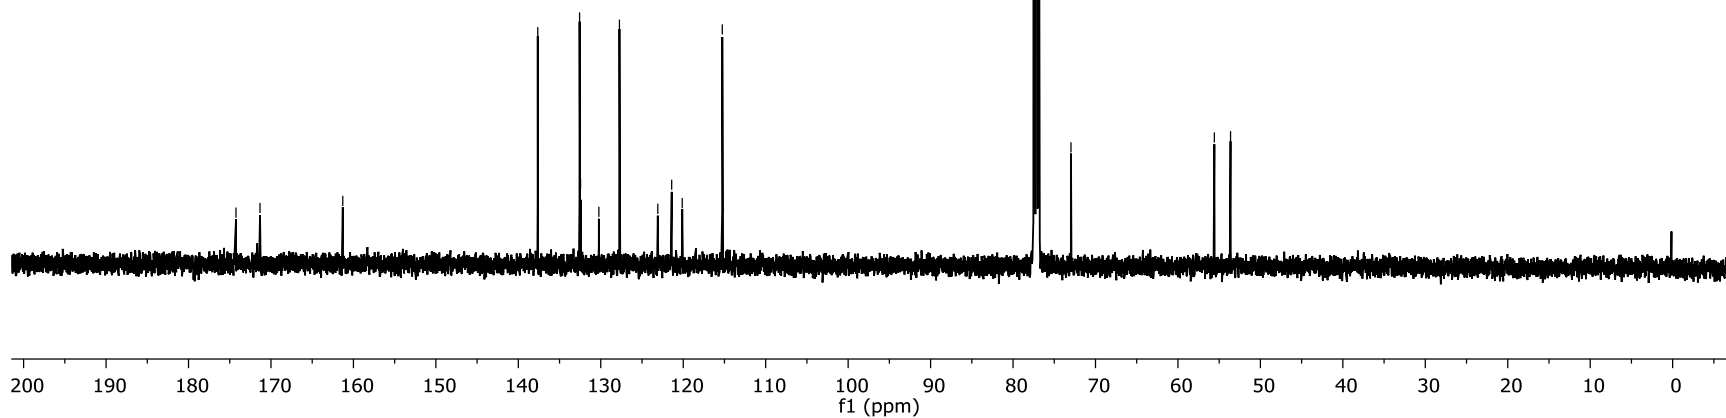

**(3S,4R)-1-(4-Bromophenyl)-3-hydroxy-4-((4-methoxyphenyl)thio)pyrrolidine-2,5-dione (3ca):  $^{13}\text{C}\{^1\text{H}\}$  NMR ( $\text{CDCl}_3$ , 126 MHz)**

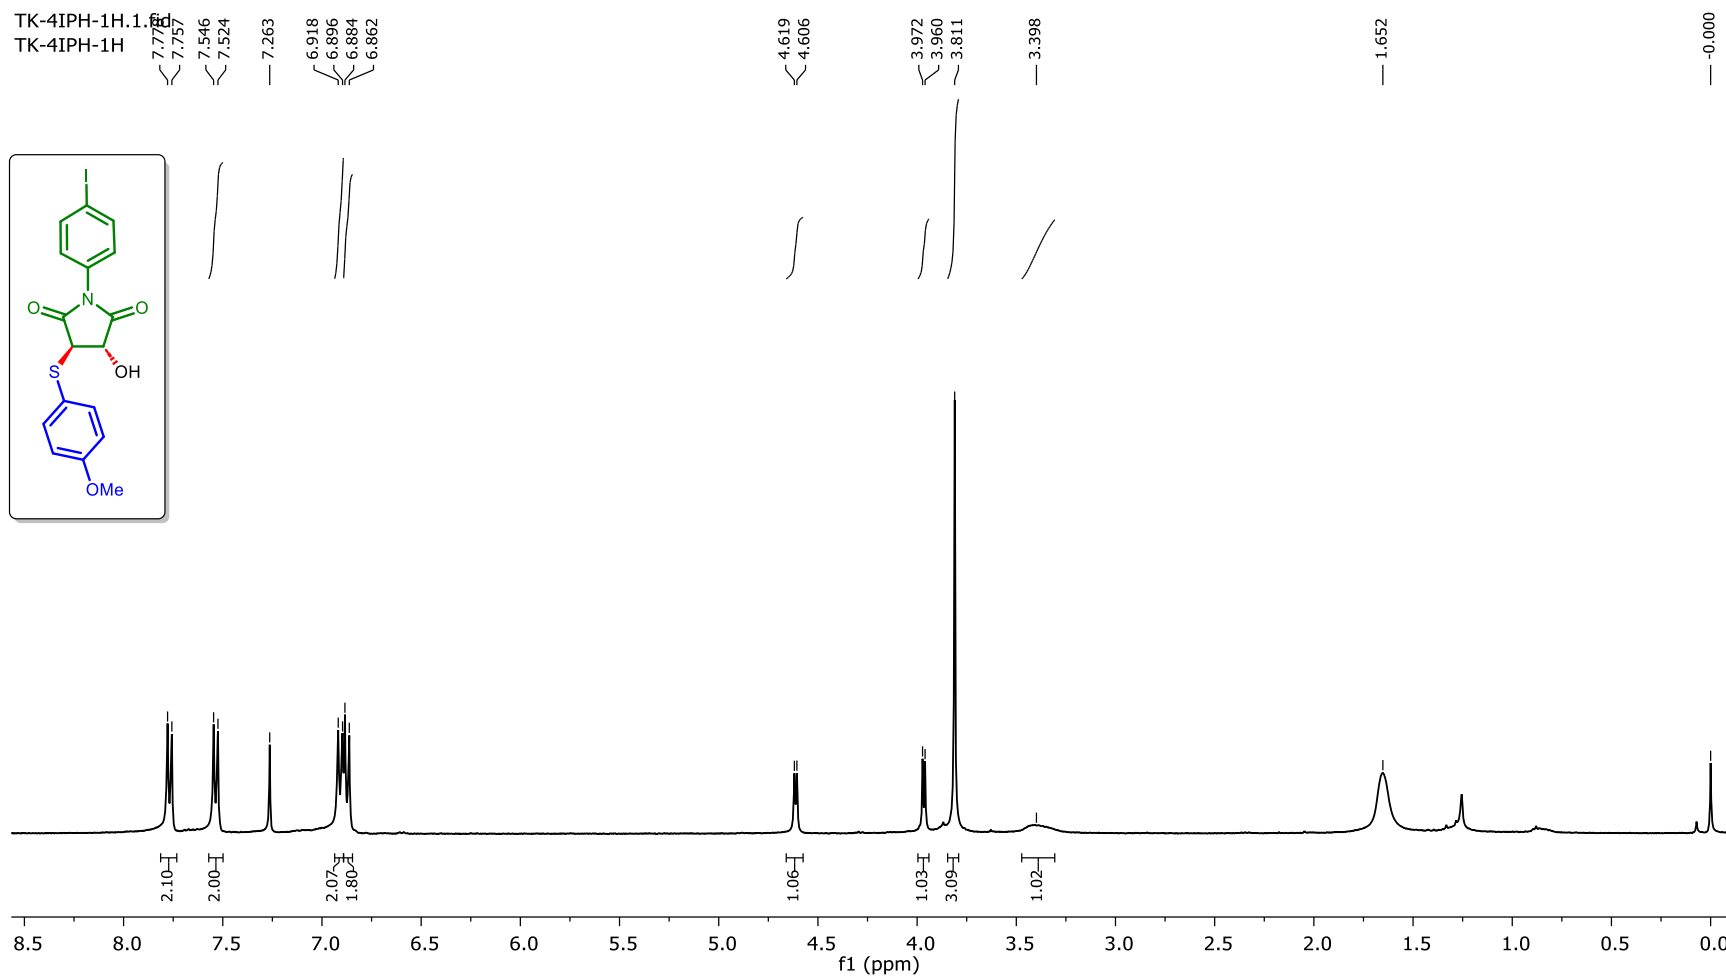

**(3S,4R)-3-Hydroxy-1-(4-iodophenyl)-4-((4-methoxyphenyl)thio)pyrrolidine-2,5-dione (3da): <sup>1</sup>H NMR (CDCl<sub>3</sub>, 400 MHz)**

TK-4IPH-13C.1.fid  
TK-4IPH-13C

— 174.231  
— 171.305  
— 161.283  
— 138.542  
— 137.644  
— 130.956  
— 127.878  
— 120.115  
— 115.256  
— 94.648  
— 77.414  
— 77.100  
— 76.906  
— 72.965  
— 55.581  
— 53.630

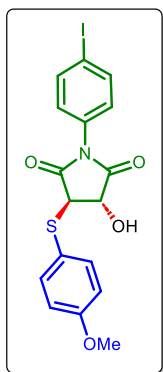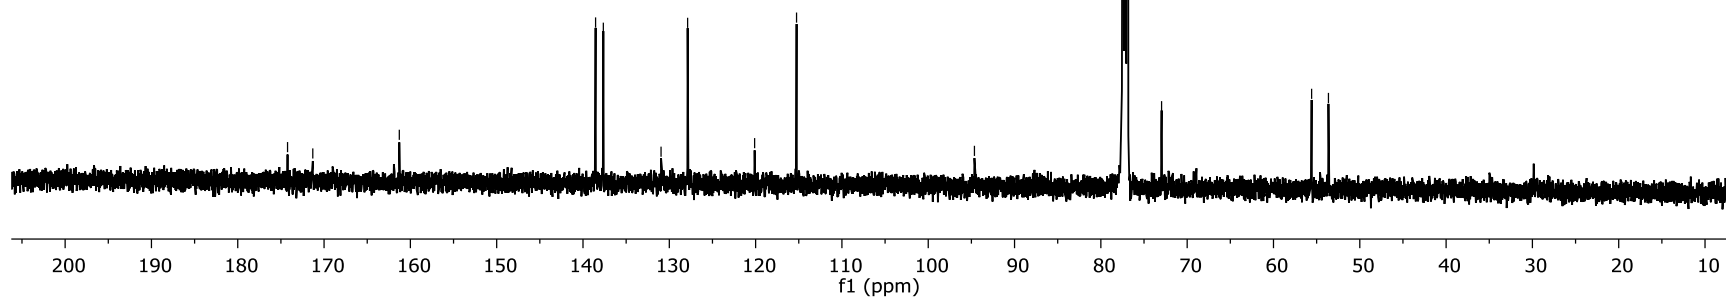

**(3*S*,4*R*)-3-Hydroxy-1-(4-iodophenyl)-4-((4-methoxyphenyl)thio)pyrrolidine-2,5-dione (3da):  $^{13}\text{C}\{^1\text{H}\}$  NMR ( $\text{CDCl}_3$ , 126 MHz)**



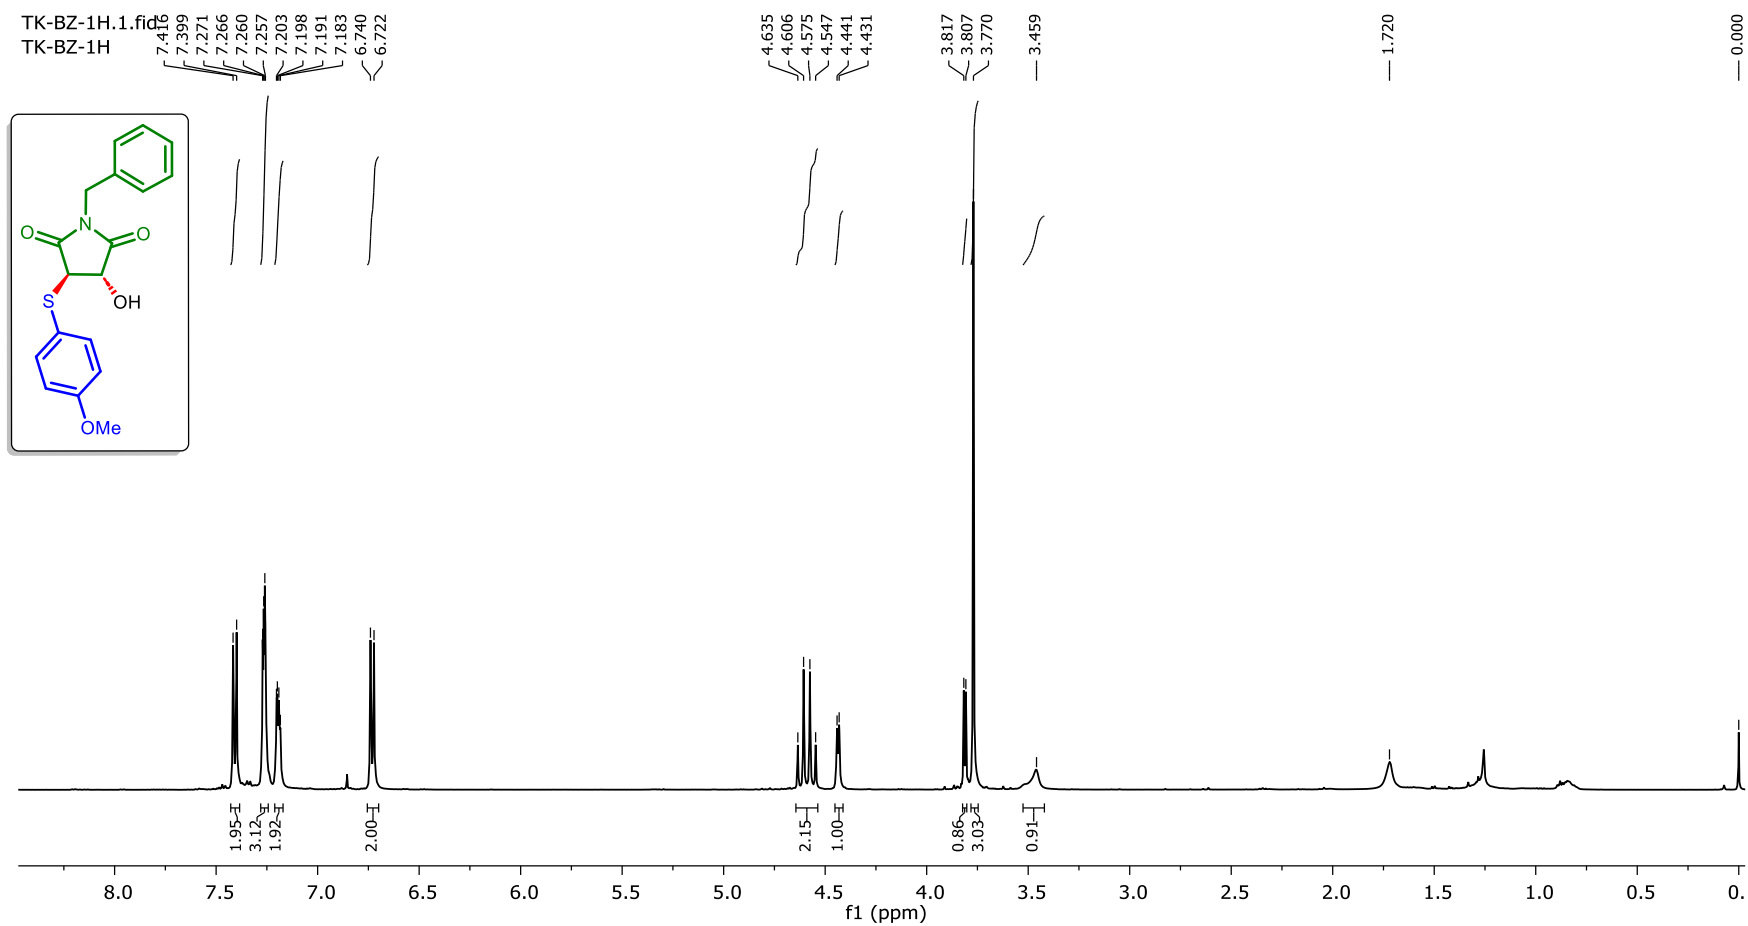

**(3*S*,4*R*)-1-Benzyl-3-hydroxy-4-((4-methoxyphenyl)thio)pyrrolidine-2,5-dione (3ea): <sup>1</sup>H NMR (CDCl<sub>3</sub>, 500 MHz)**

TK-BZ-13C.5.H  
TK-BZ-13C

— 175.414  
— 172.227

— 160.932

— 137.346  
— 134.954

— 128.800  
— 128.696  
— 128.215

— 120.198

— 115.089

— 77.413  
— 77.160  
— 76.905  
— 72.665

— 55.449  
— 53.640

— 42.940

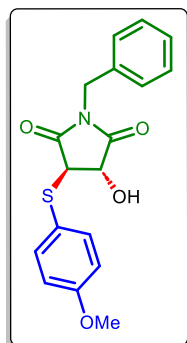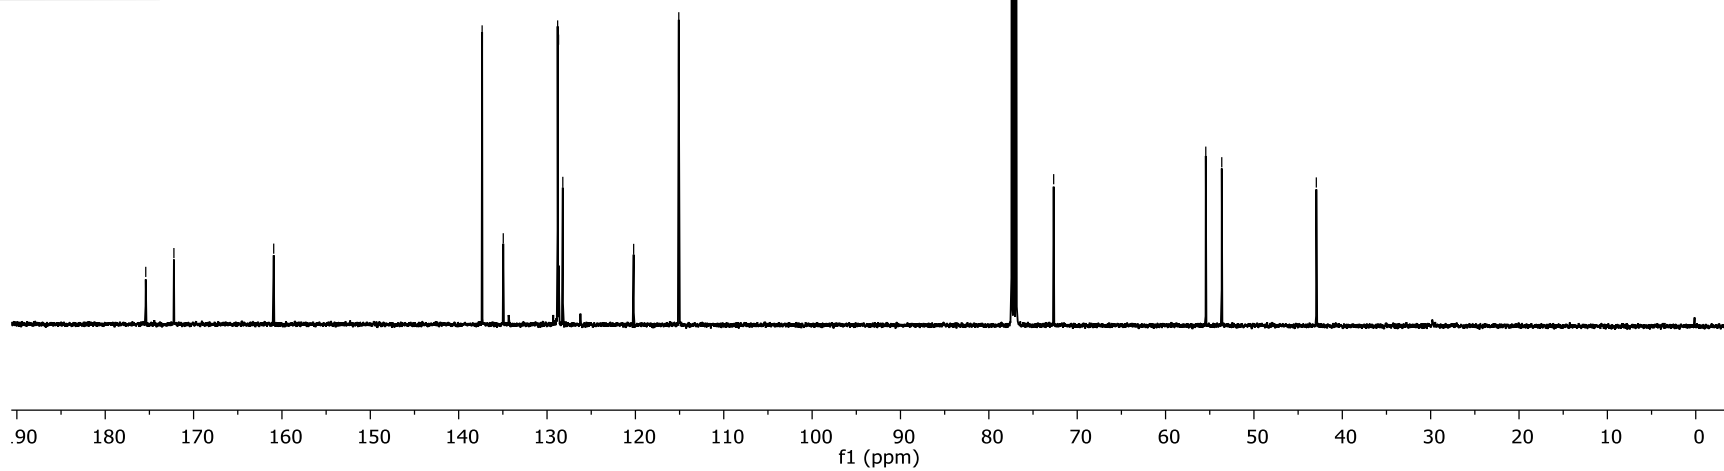

**(3S,4R)-1-Benzyl-3-hydroxy-4-((4-methoxyphenyl)thio)pyrrolidine-2,5-dione (3ea):  $^{13}\text{C}\{^1\text{H}\}$  NMR ( $\text{CDCl}_3$ , 126 MHz)**

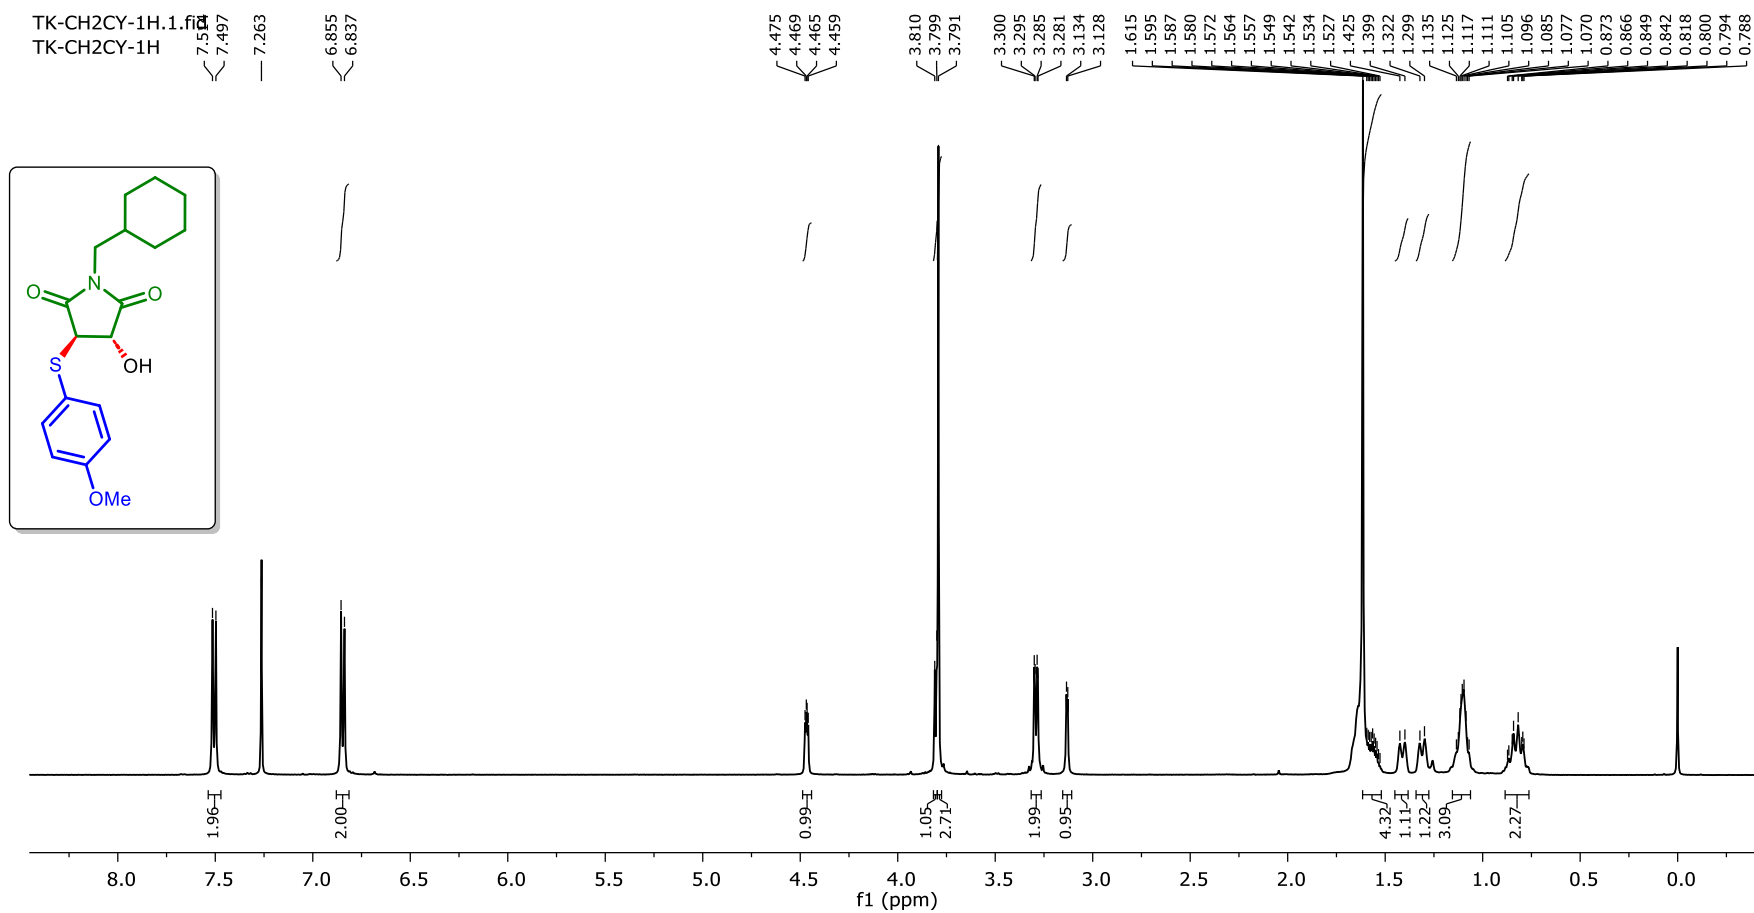

**(3S,4R)-1-(Cyclohexylmethyl)-3-hydroxy-4-((4-methoxyphenyl)thio)pyrrolidine-2,5-dione (3fa):  $^1\text{H}$  NMR ( $\text{CDCl}_3$ , 500 MHz)**

TK-CH2CY-13C.1.fid  
TK-CH2CY-13C

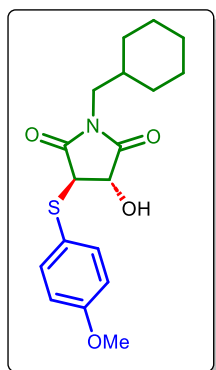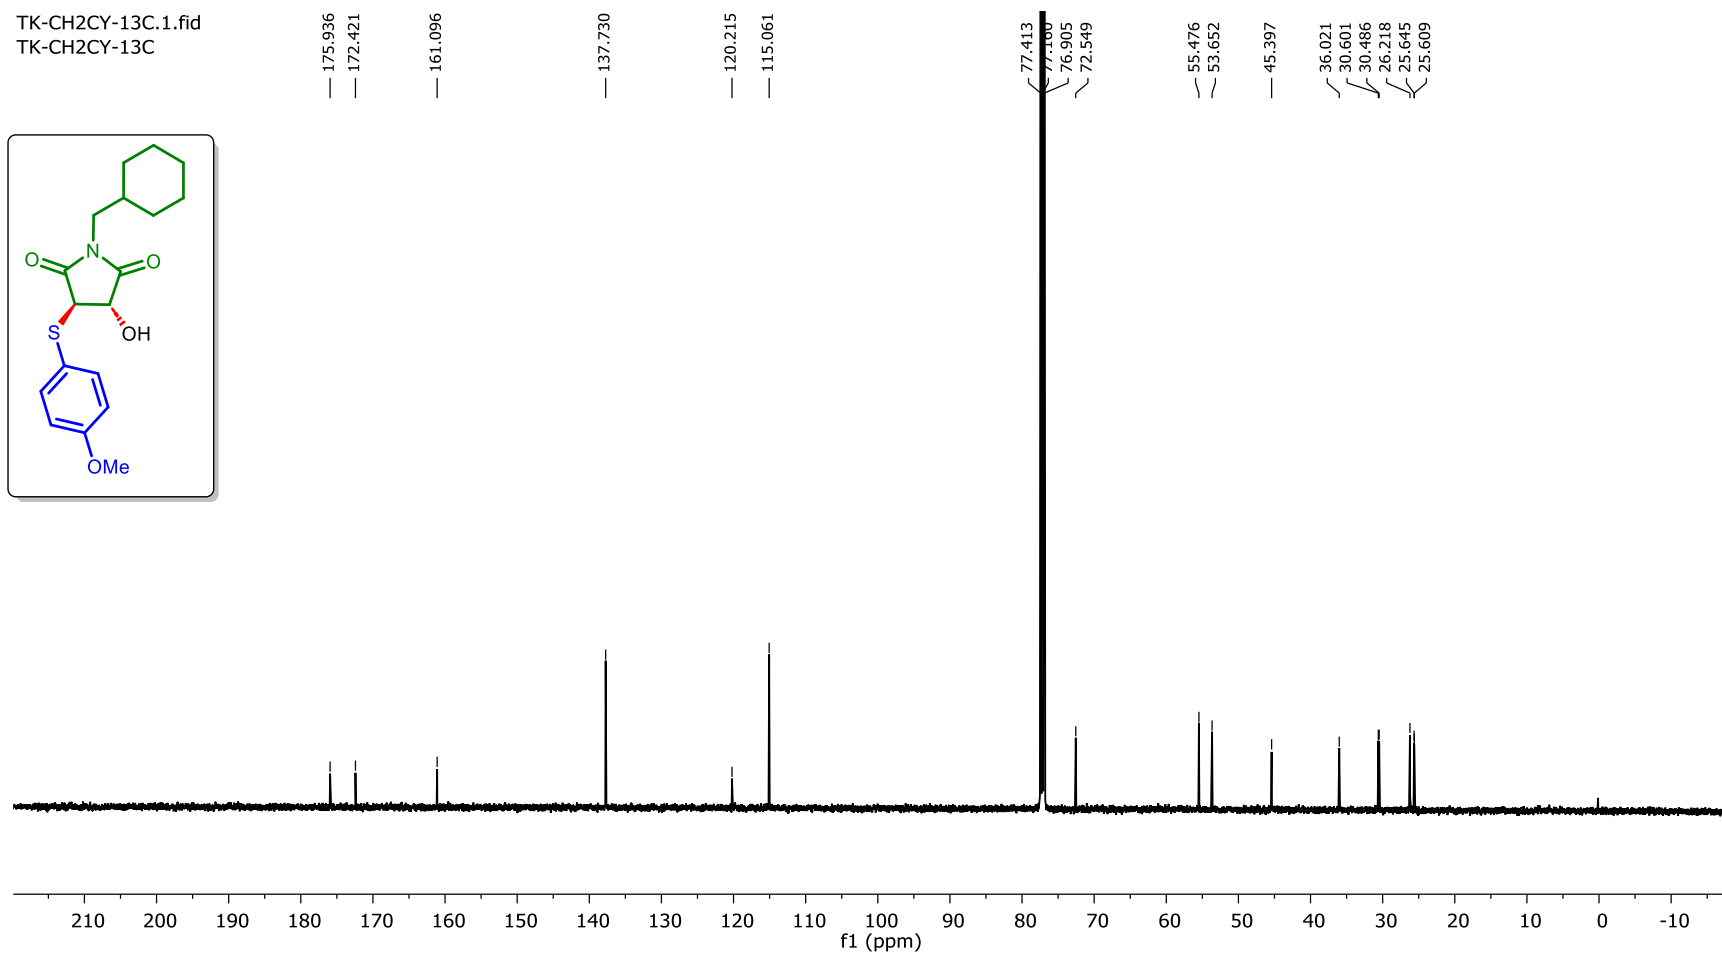

**(3S,4R)-1-(Cyclohexylmethyl)-3-hydroxy-4-((4-methoxyphenyl)thio)pyrrolidine-2,5-dione (3fa):  $^{13}\text{C}\{^1\text{H}\}$  NMR ( $\text{CDCl}_3$ , 126 MHz)**

TK-BZ-OME-1H.1.fid  
TK-BZ-OME-1H

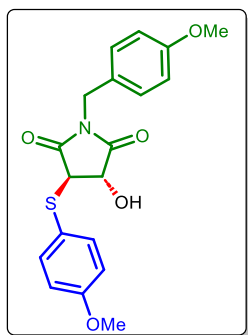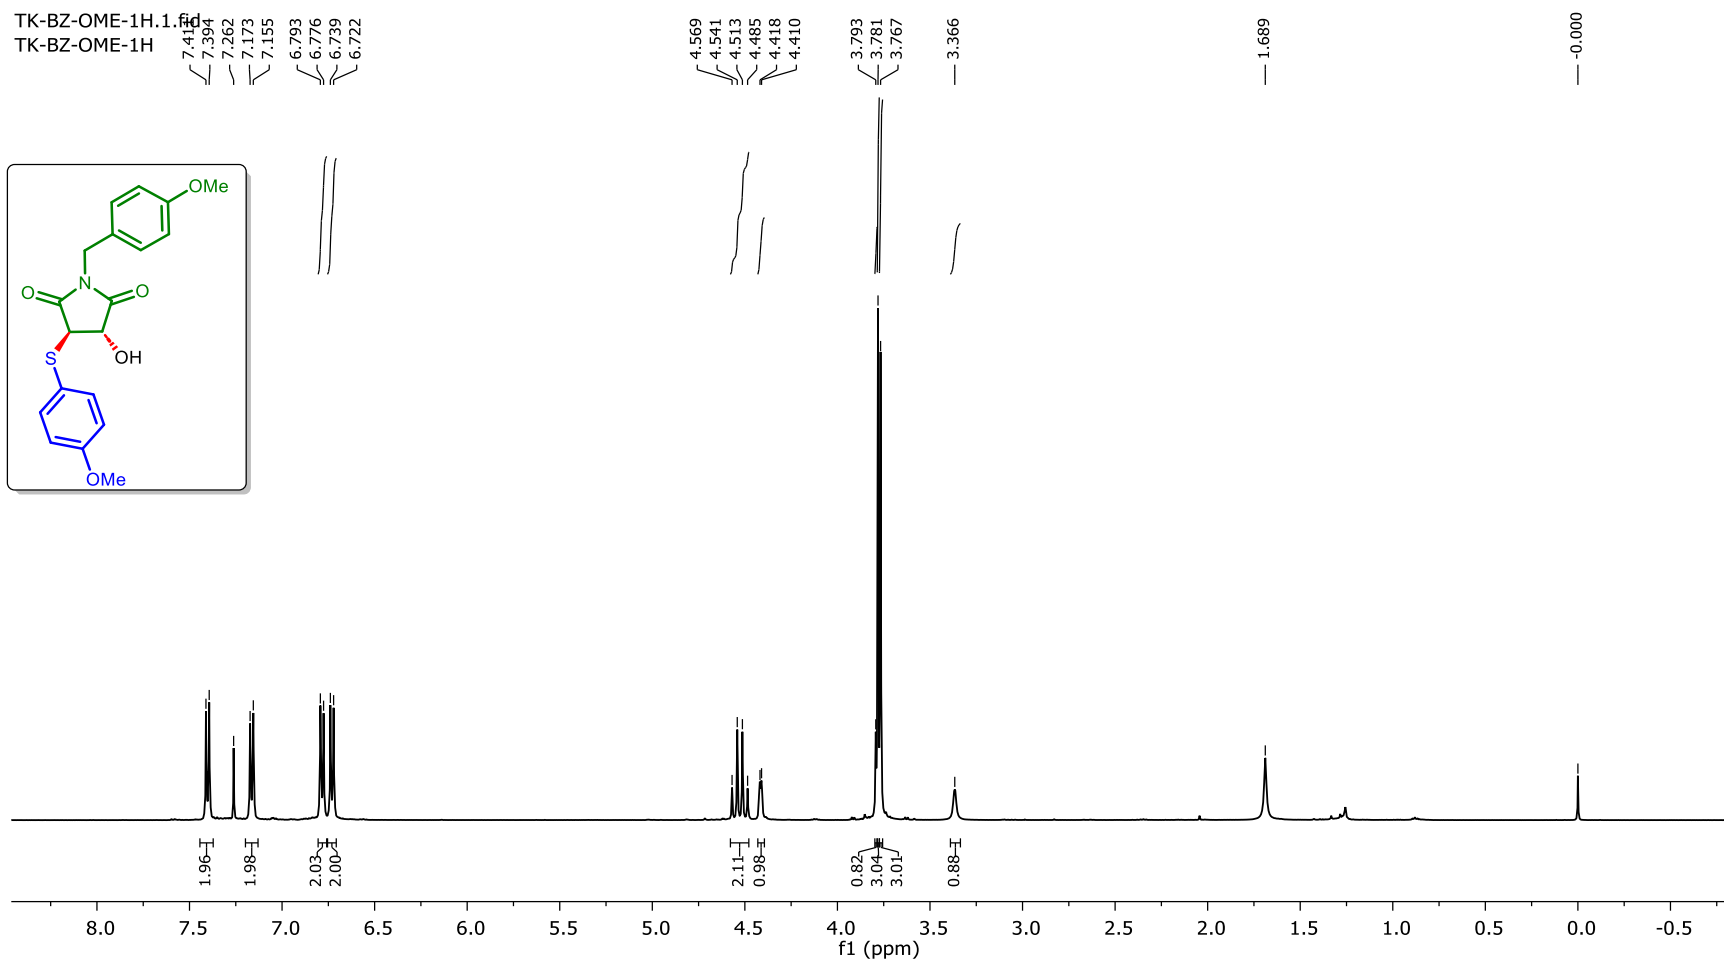

**(3S,4R)-3-Hydroxy-1-(4-methoxybenzyl)-4-((4-methoxyphenyl)thio)pyrrolidine-2,5-dione (3ga):  $^1\text{H}$  NMR ( $\text{CDCl}_3$ , 500 MHz)**

TK-BZ-OME-13C.1  
TK-BZ-OME-13C

175.3118  
172.288

160.908  
159.523

137.280

130.289  
127.295

120.263  
115.070  
114.115

77.413  
77.160  
76.905  
72.767

55.416  
55.377  
53.626

42.443

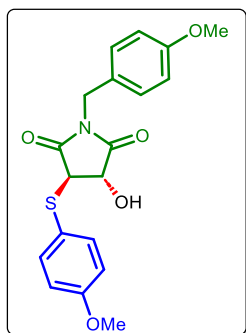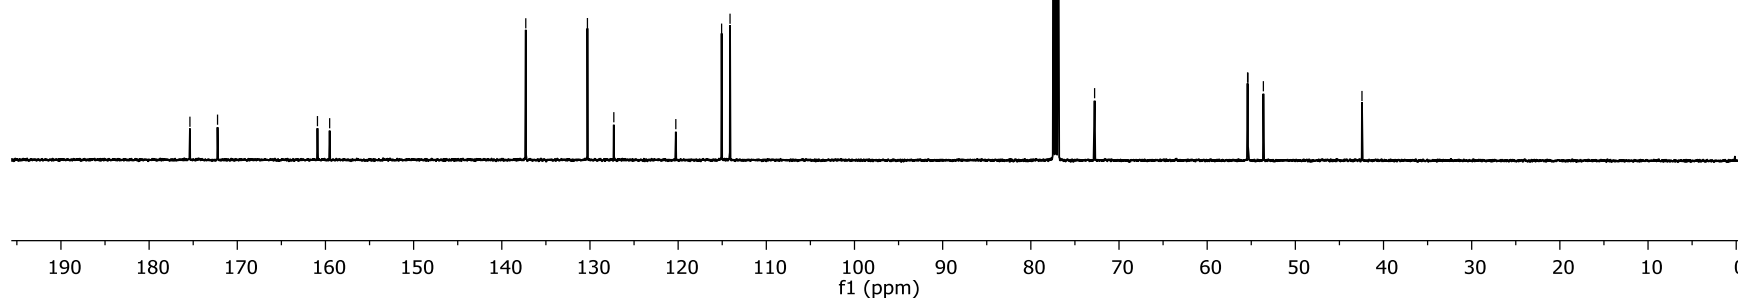

**(3*S*,4*R*)-3-Hydroxy-1-(4-methoxybenzyl)-4-((4-methoxyphenyl)thio)pyrrolidine-2,5-dione (3ga):  $^{13}\text{C}\{^1\text{H}\}$  NMR ( $\text{CDCl}_3$ , 126 MHz)**

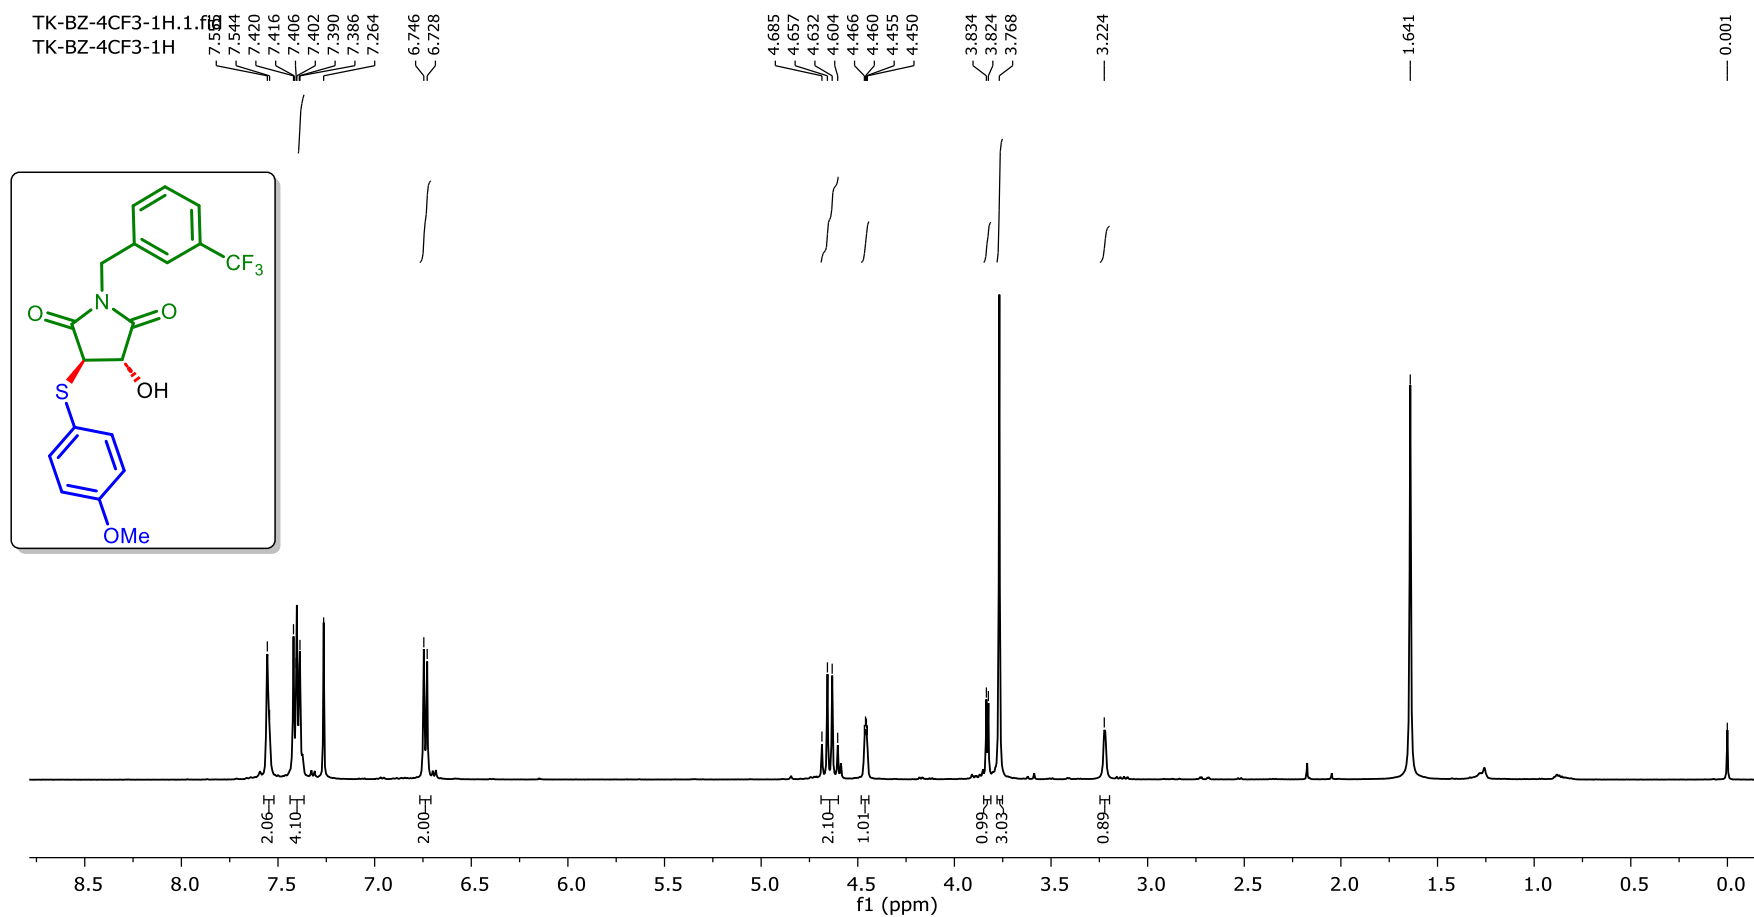

**(3*S*,4*R*)-3-Hydroxy-4-((4-methoxyphenyl)thio)-1-(3-(trifluoromethyl)benzyl)pyrrolidine-2,5-dione (3ha): <sup>1</sup>H NMR (CDCl<sub>3</sub>, 500 MHz)**

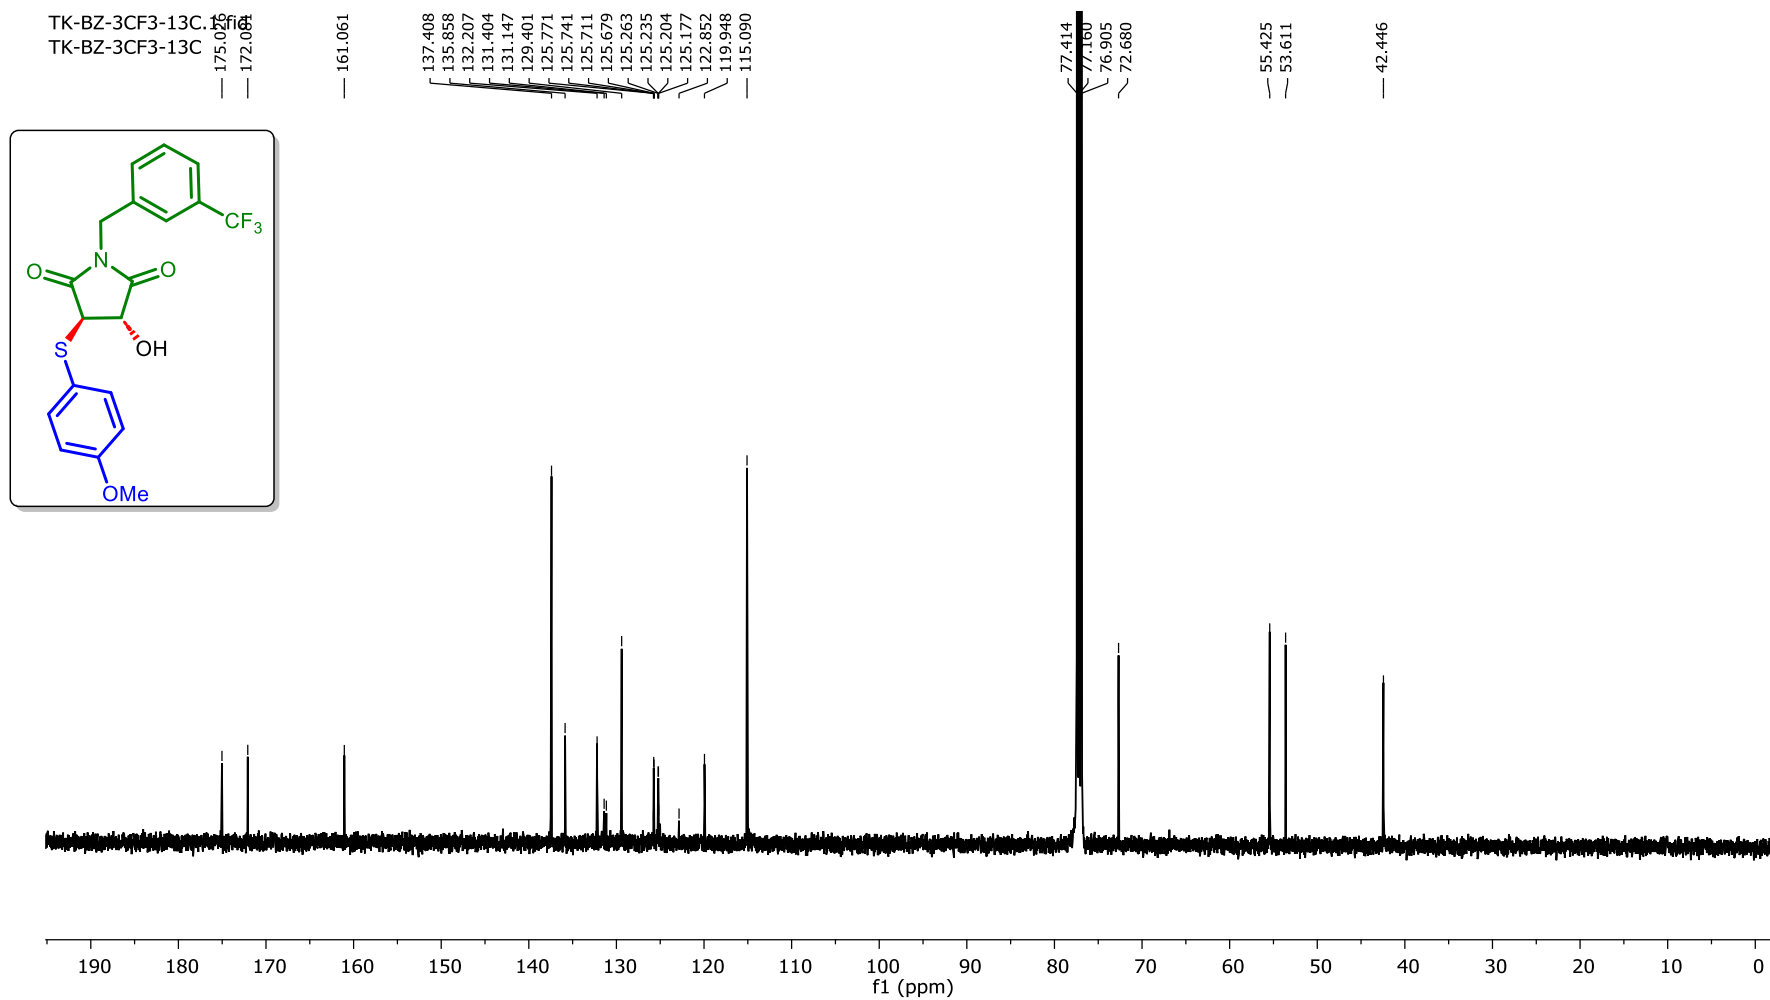

**(3*S*,4*R*)-3-Hydroxy-4-((4-methoxyphenyl)thio)-1-(3-(trifluoromethyl)benzyl)pyrrolidine-2,5-dione (3ha):  $^{13}\text{C}\{^1\text{H}\}$  NMR (CDCl<sub>3</sub>, 126 MHz)**



TK-BZ-4CF3-19F.3.fid  
TK-BZ-4CF3-19F

— -62.611

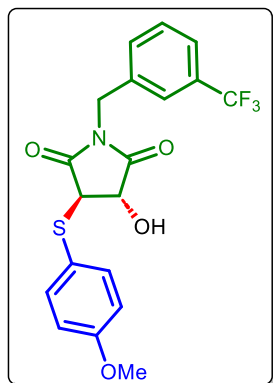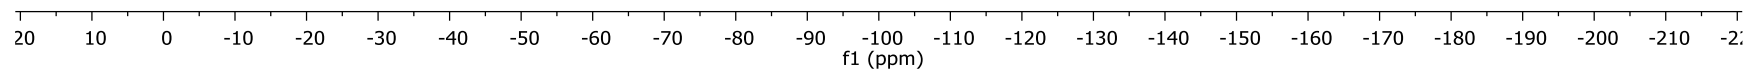

**(3*S*,4*R*)-3-Hydroxy-4-((4-methoxyphenyl)thio)-1-(3-(trifluoromethyl)benzyl)pyrrolidine-2,5-dione (3ha): <sup>19</sup>FNMR (CDCl<sub>3</sub>, 471 MHz)**

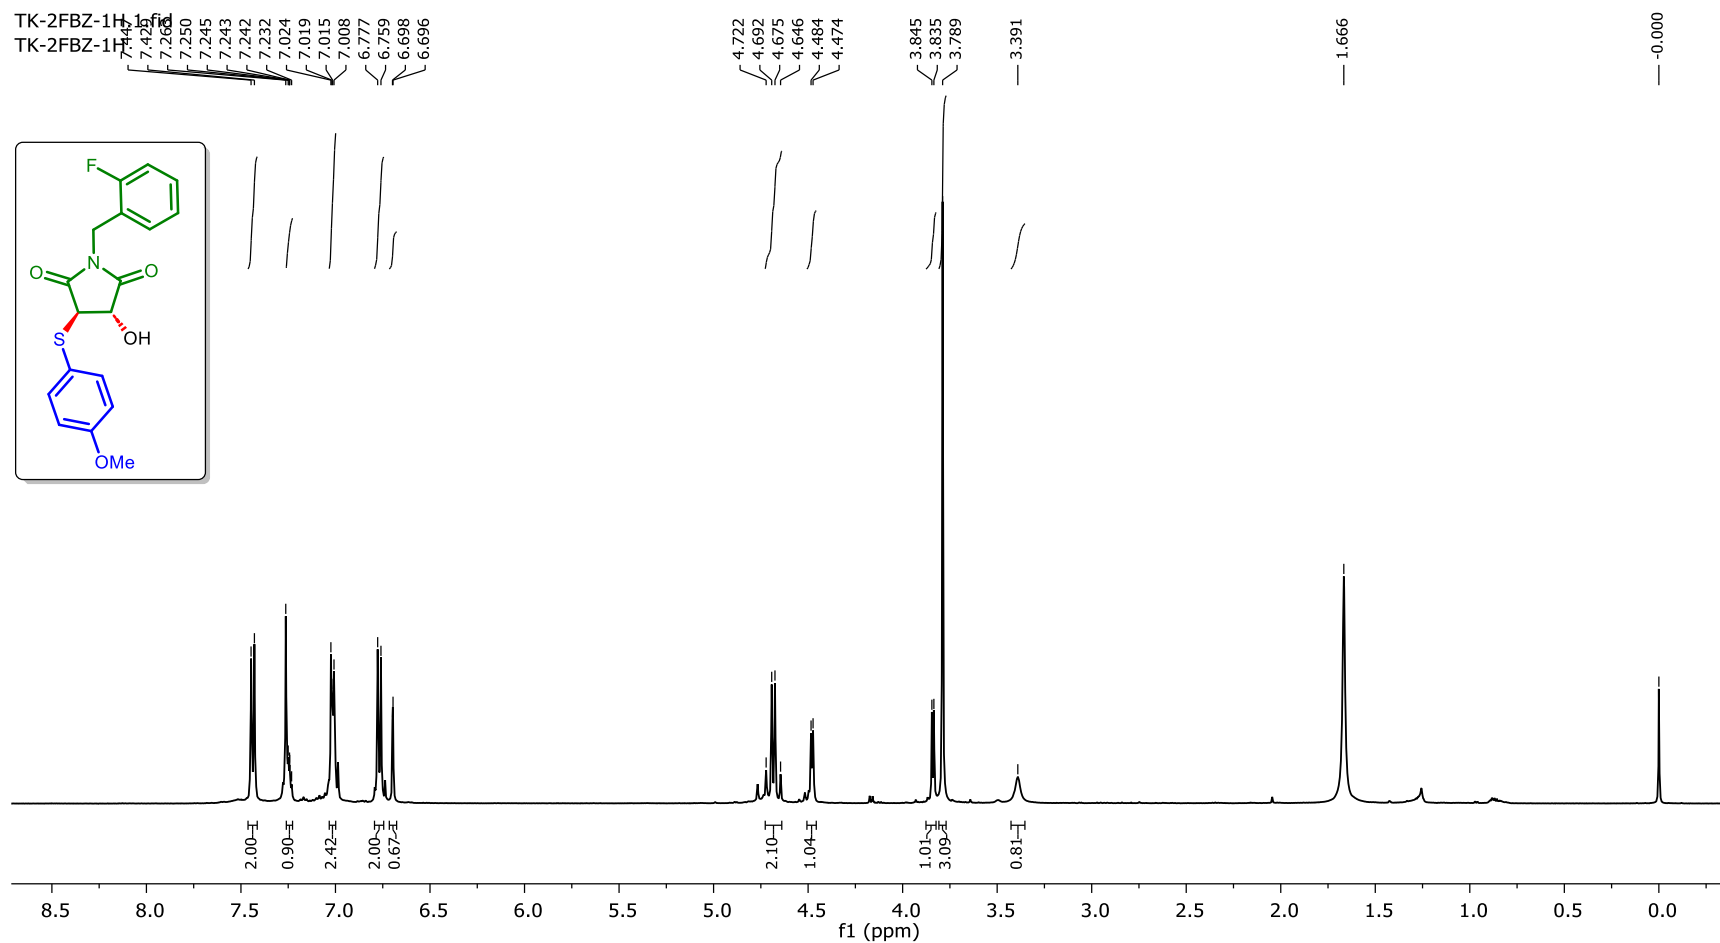

**(3*S*,4*R*)-1-(2-Fluorobenzyl)-3-hydroxy-4-((4-methoxyphenyl)thio)pyrrolidine-2,5-dione (3ia): <sup>1</sup>H NMR (CDCl<sub>3</sub>, 500 MHz)**

TK-2FBZ-13C  
TK-2FBZ-13C

175.137  
171.954

161.009

137.508  
135.257  
130.165  
130.137  
130.007  
129.942  
124.318  
124.289  
121.769  
121.654  
120.162  
115.793  
115.624  
115.125

77.414  
77.161  
76.906  
72.630

55.473  
53.678

36.726  
36.689

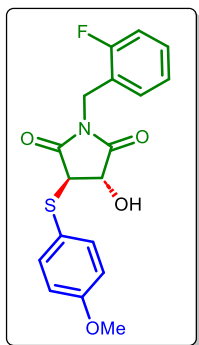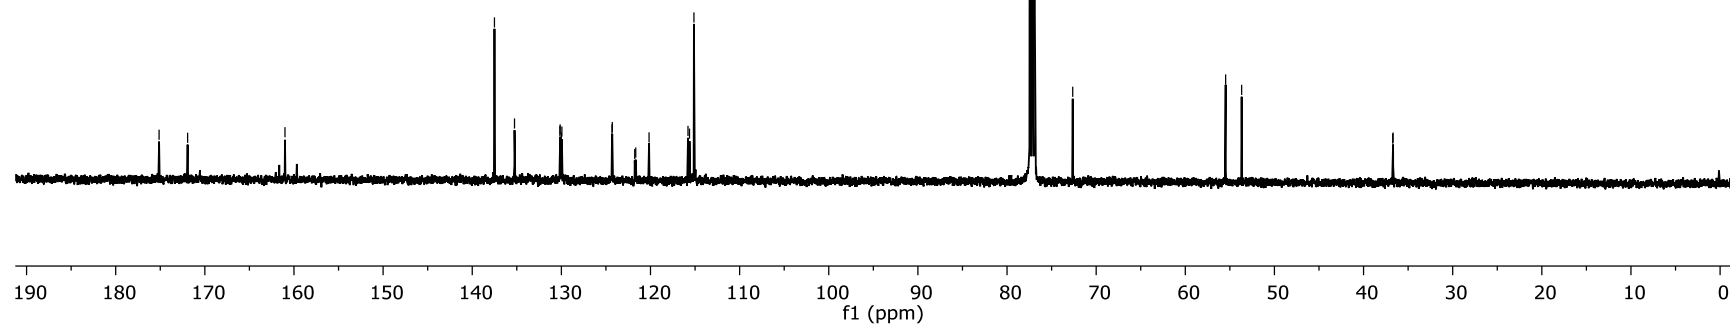

**(3S,4R)-1-(2-Fluorobenzyl)-3-hydroxy-4-((4-methoxyphenyl)thio)pyrrolidine-2,5-dione (3ia):  $^{13}\text{C}\{^1\text{H}\}$  NMR ( $\text{CDCl}_3$ , 126 MHz)**

TK-2FBZ-19F.3.fid  
TK-2FBZ-19F

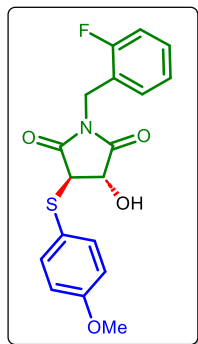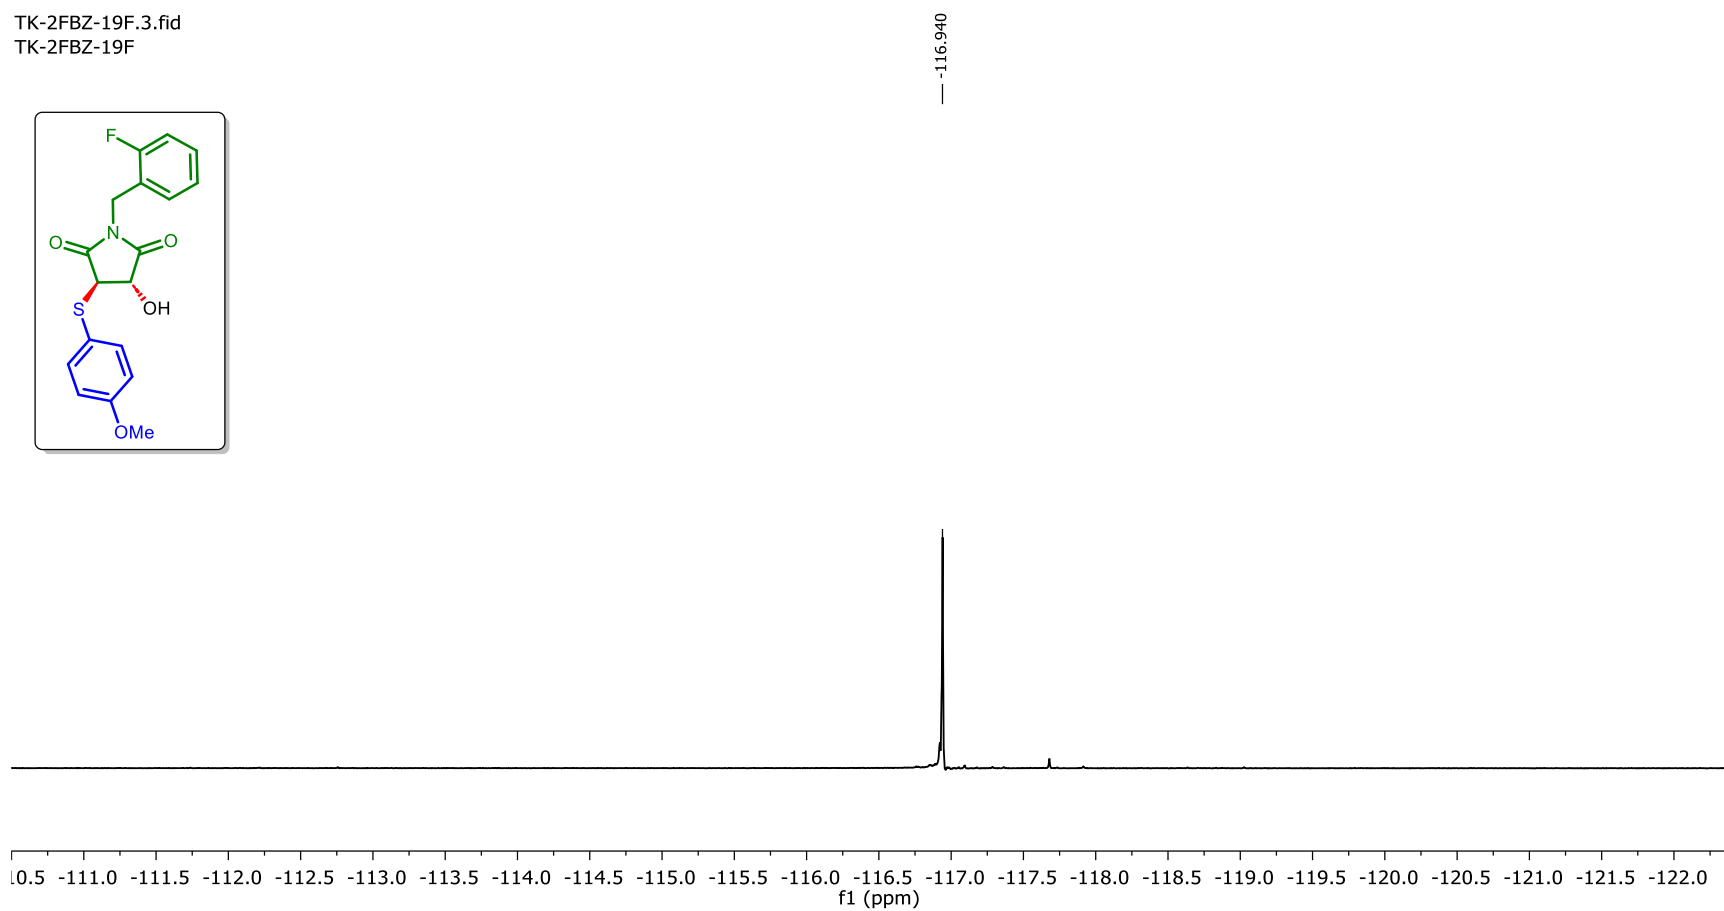

**(3*S*,4*R*)-1-(2-Fluorobenzyl)-3-hydroxy-4-((4-methoxyphenyl)thio)pyrrolidine-2,5-dione (3ia): <sup>19</sup>F NMR (CDCl<sub>3</sub>, 471 MHz)**

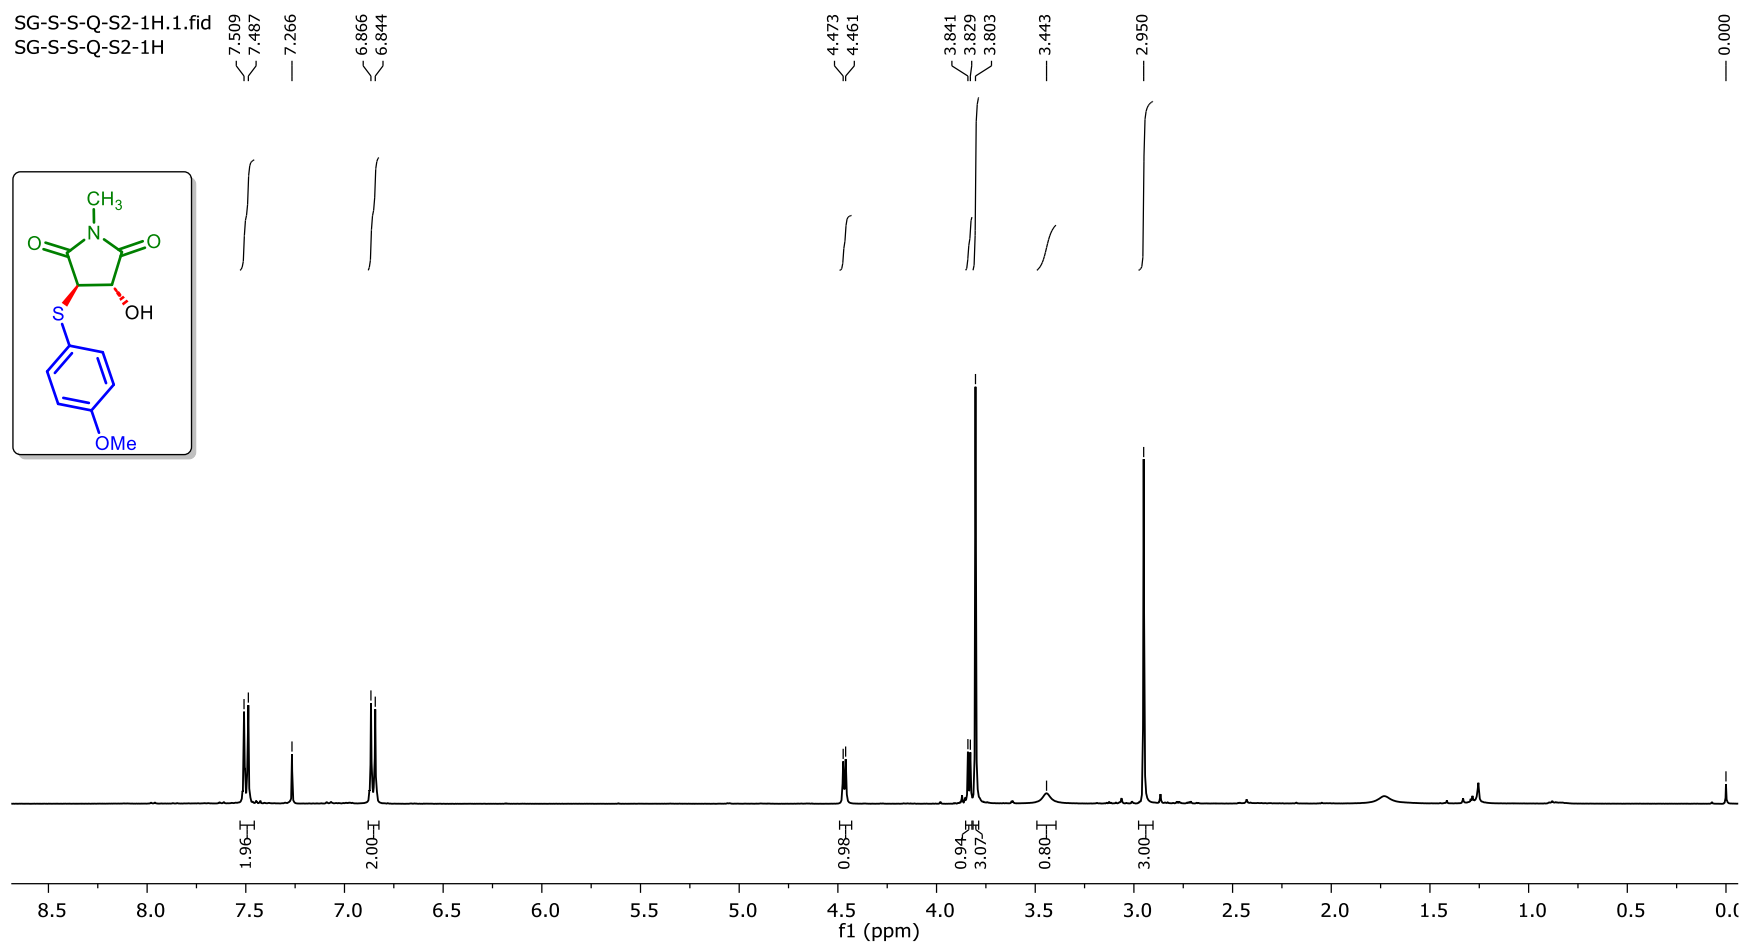

**(3*S*,4*R*)-3-Hydroxy-4-((4-methoxyphenyl)thio)-1-methylpyrrolidine-2,5-dione (3ja): <sup>1</sup>H NMR (CDCl<sub>3</sub>, 400 MHz)**

SG-S-S-Q-S2-136  
SG-S-S-Q-S2-136

176.881  
172.657

161.000

137.229

120.522

115.134

77.414  
77.160  
76.906  
72.921

55.509  
53.821

25.396

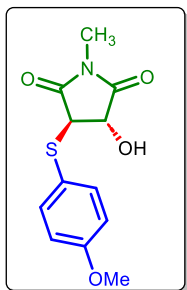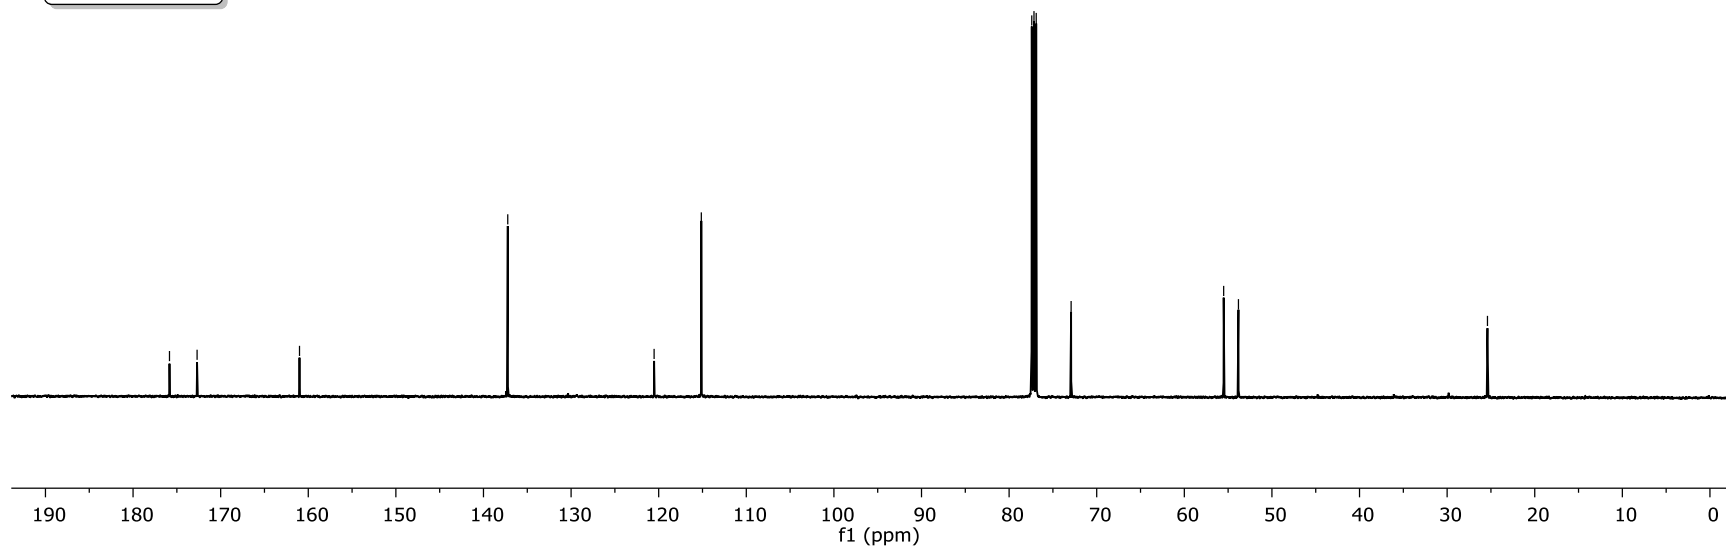

**(3S,4R)-3-Hydroxy-4-((4-methoxyphenyl)thio)-1-methylpyrrolidine-2,5-dione (3ja):  $^{13}\text{C}\{^1\text{H}\}$  NMR ( $\text{CDCl}_3$ , 126 MHz)**

TK-ET-1H.1.fid  
TK-ET-1H

7.508  
7.490  
— 7.266

6.859  
6.841

4.453  
4.443

3.810  
3.798  
3.526  
3.512  
3.497  
3.483  
3.451

— 1.724

1.088  
1.074  
1.059

— 0.000

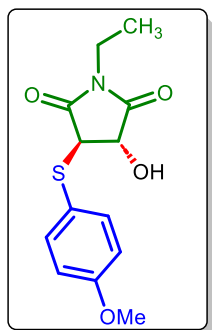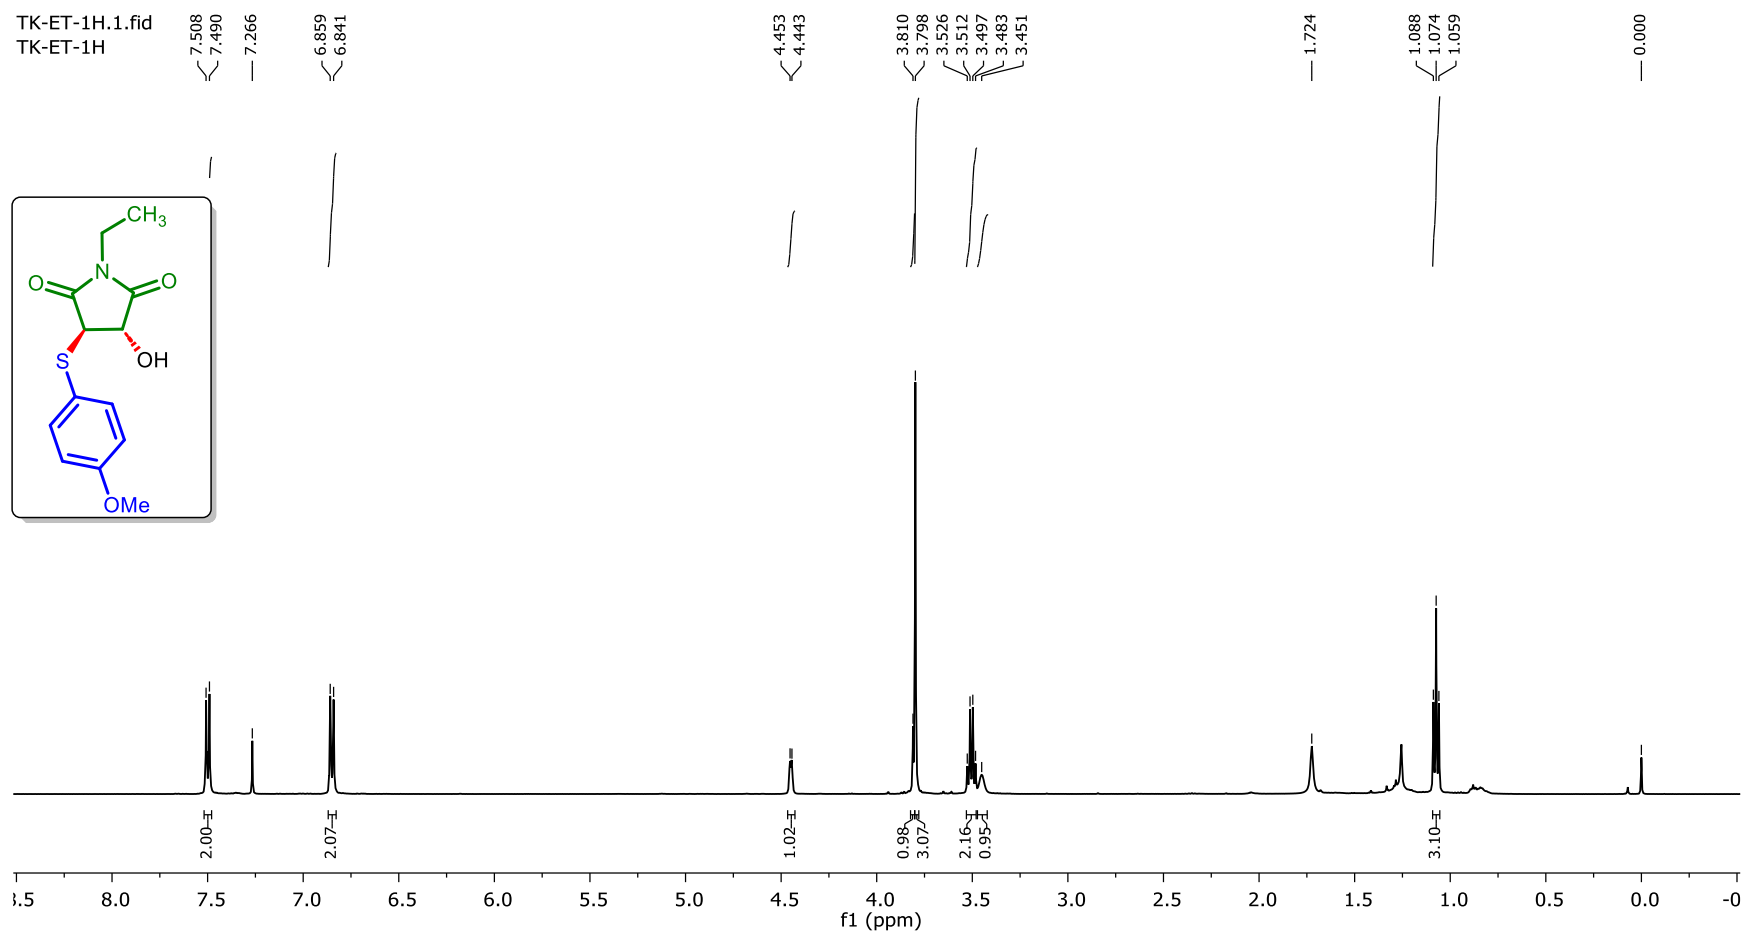

**(3S,4R)-1-Ethyl-3-hydroxy-4-((4-methoxyphenyl)thio)pyrrolidine-2,5-dione (3ka): <sup>1</sup>H NMR (CDCl<sub>3</sub>, 500 MHz)**

TK-ET-13C.1.fid  
TK-ET-13C

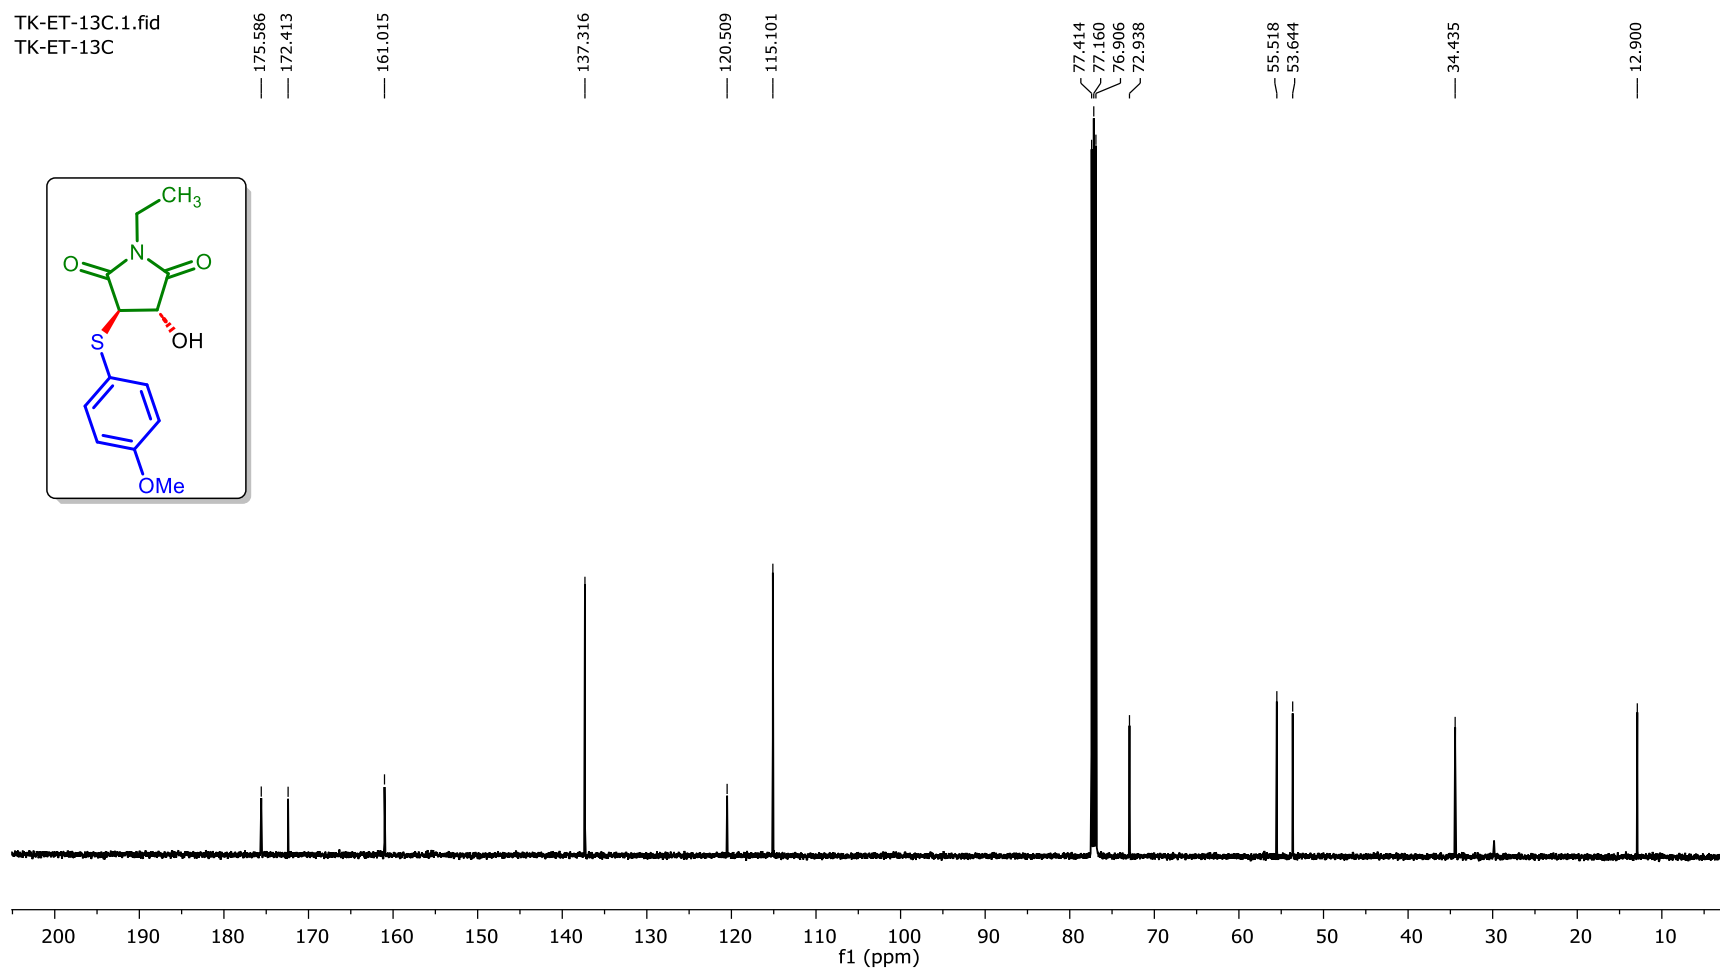

**(3*S*,4*R*)-1-Ethyl-3-hydroxy-4-((4-methoxyphenyl)thio)pyrrolidine-2,5-dione (3ka):  $^{13}\text{C}\{^1\text{H}\}$  NMR ( $\text{CDCl}_3$ , 126 MHz)**



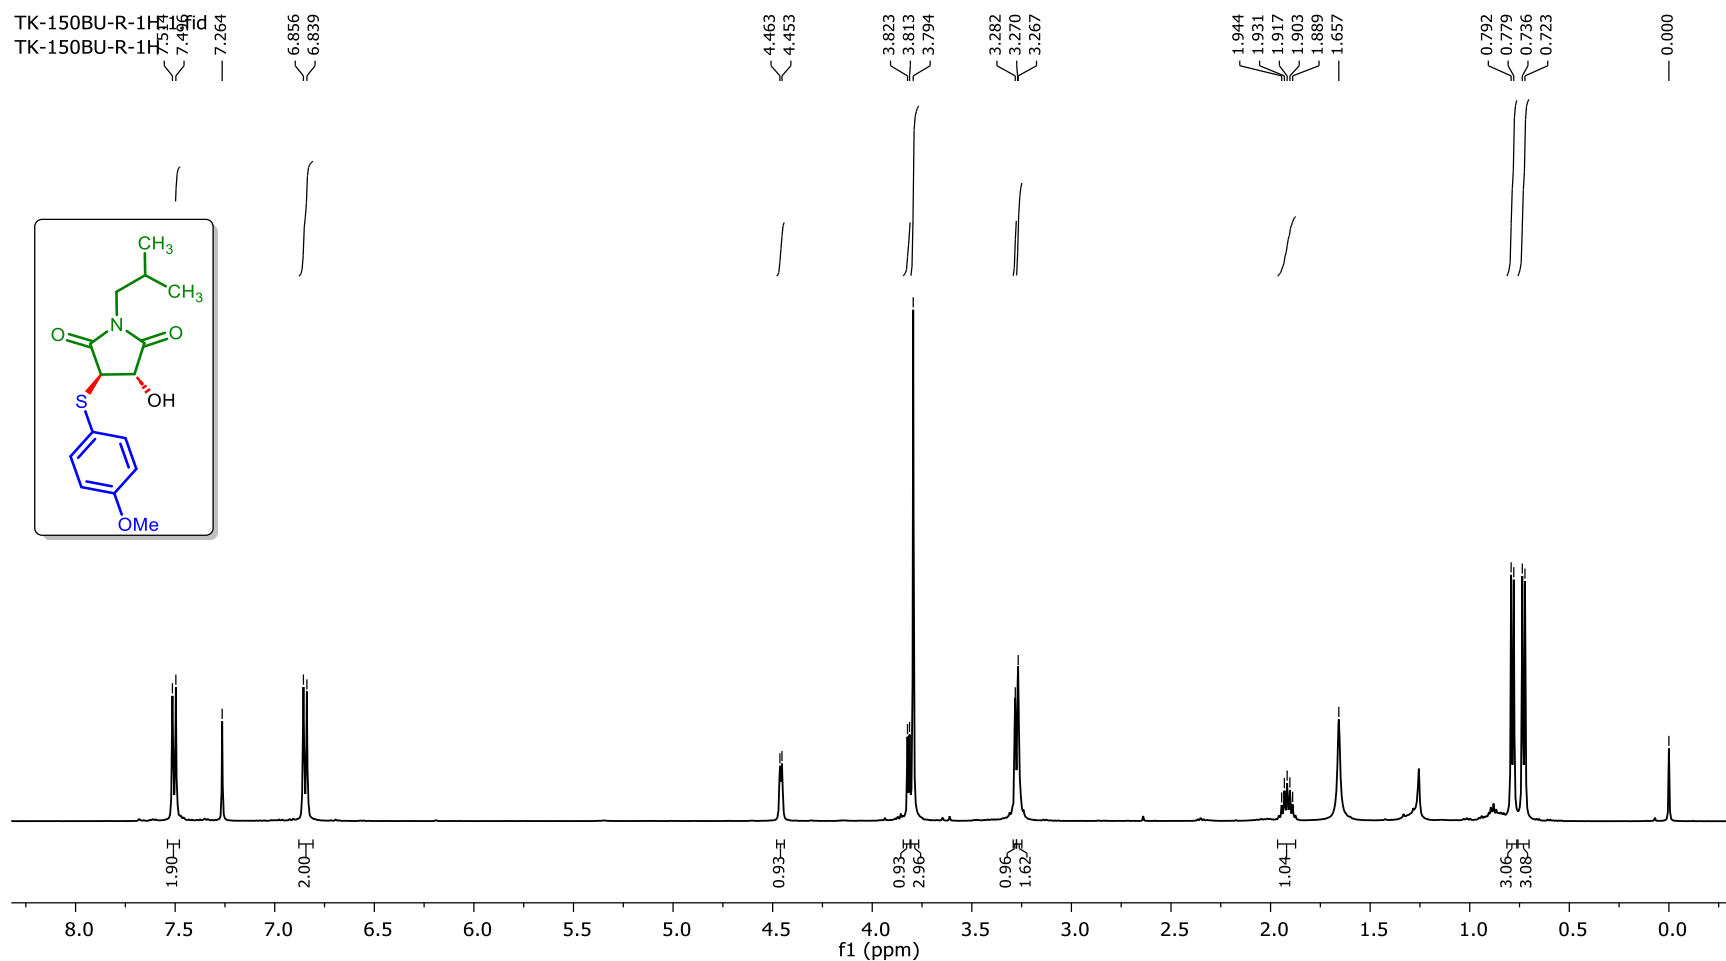

**(3S,4R)-3-Hydroxy-1-isobutyl-4-((4-methoxyphenyl)thio)pyrrolidine-2,5-dione (3la):  $^1\text{H}$  NMR ( $\text{CDCl}_3$ , 500 MHz)**

TK-150BU-R-13C.1.fid  
TK-150BU-R-13C

— 175.976 — 172.526 — 161.106 — 137.560 — 120.363 — 115.130 — 77.414 — 77.160 — 76.906 — 72.578 — 55.528 — 53.647 — 46.580 — 27.061 — 19.997 — 19.934

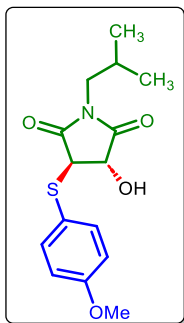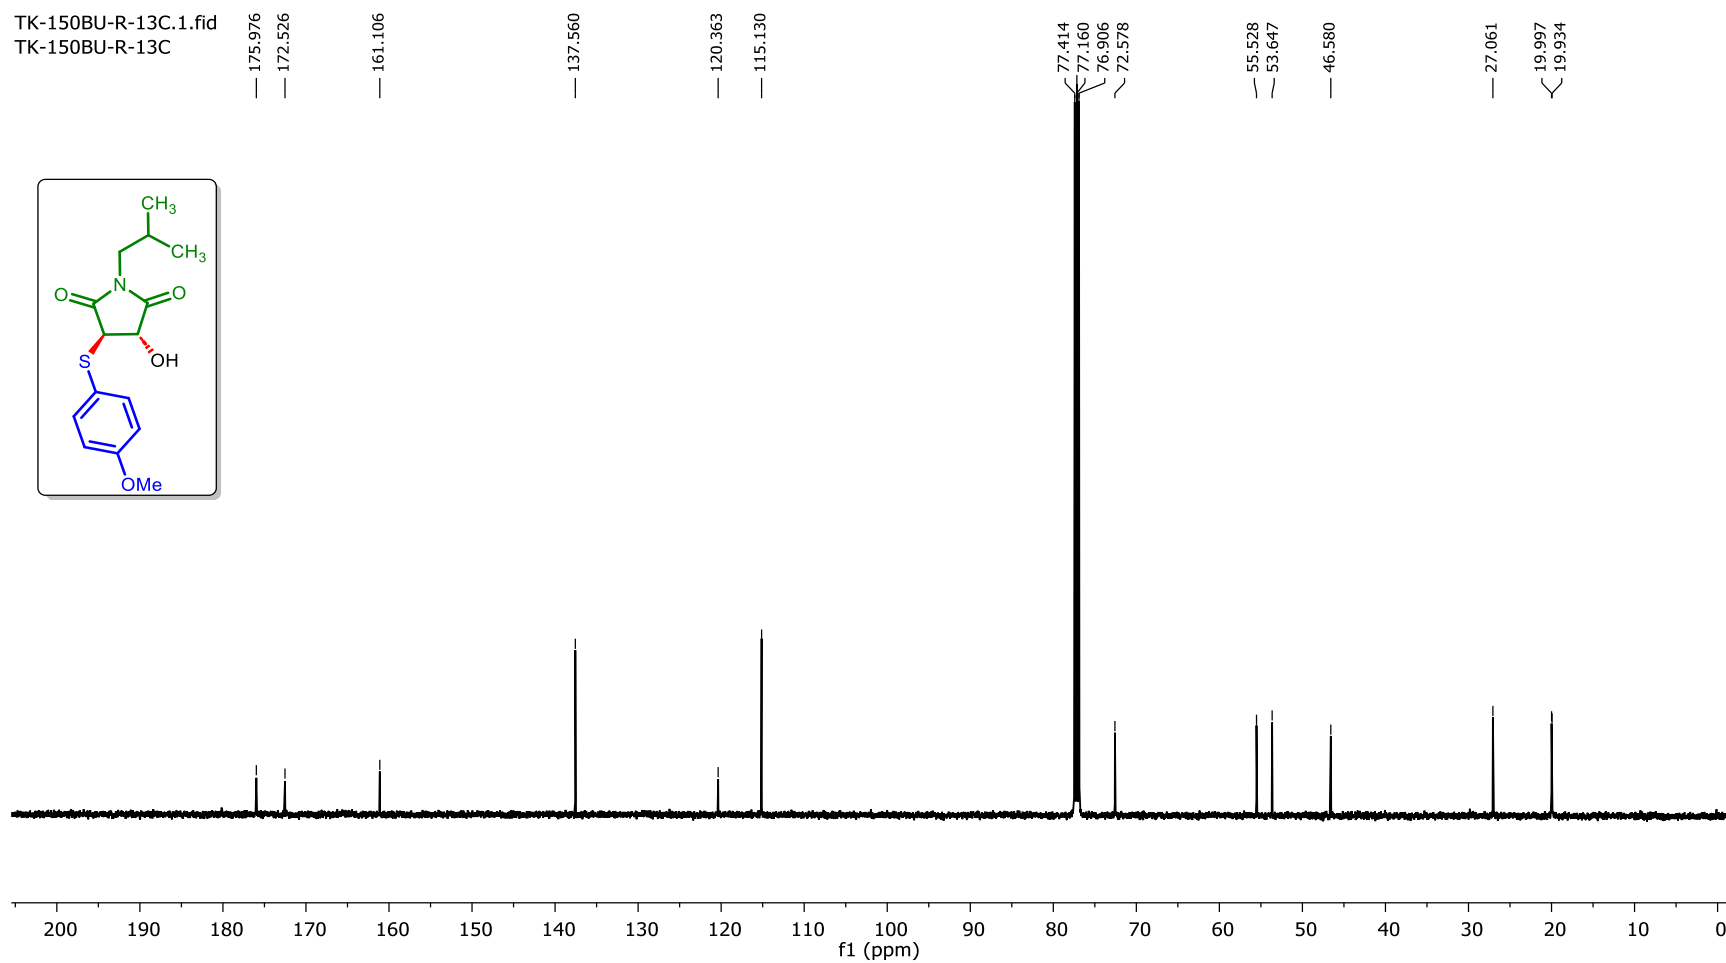

**(3*S*,4*R*)-3-Hydroxy-1-isobutyl-4-((4-methoxyphenyl)thio)pyrrolidine-2,5-dione (3la):  $^{13}\text{C}\{^1\text{H}\}$  NMR ( $\text{CDCl}_3$ , 126 MHz)**

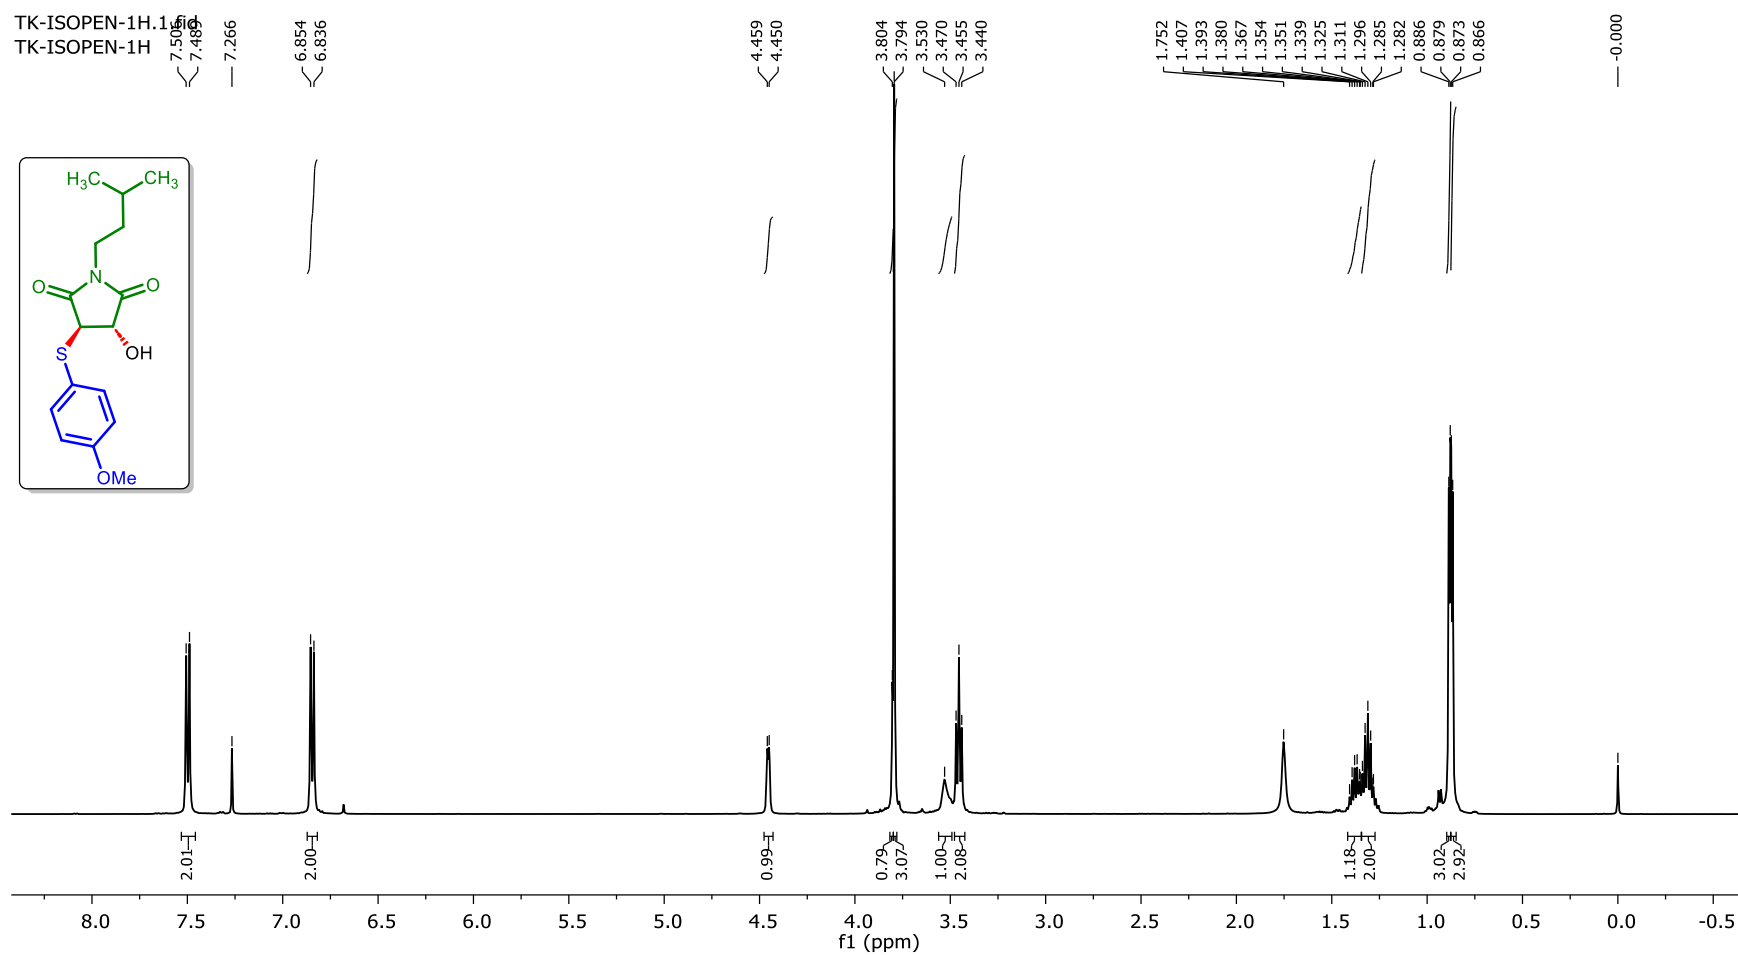

**(3S,4R)-3-Hydroxy-1-isopentyl-4-((4-methoxyphenyl)thio)pyrrolidine-2,5-dione (3ma): <sup>1</sup>H NMR (CDCl<sub>3</sub>, 500 MHz)**

K- ISOPEN-13C.1.fid  
K- ISOPEN-13C

— 175.694  
— 172.384

— 161.041

— 137.452

— 120.449

— 115.093

— 77.415  
— 77.101  
— 76.907  
— 72.852

— 55.490  
— 53.648

— 37.934  
— 36.250

— 25.856  
— 22.354  
— 22.349

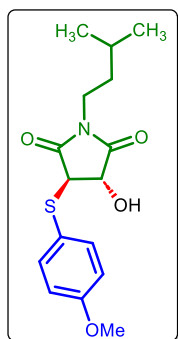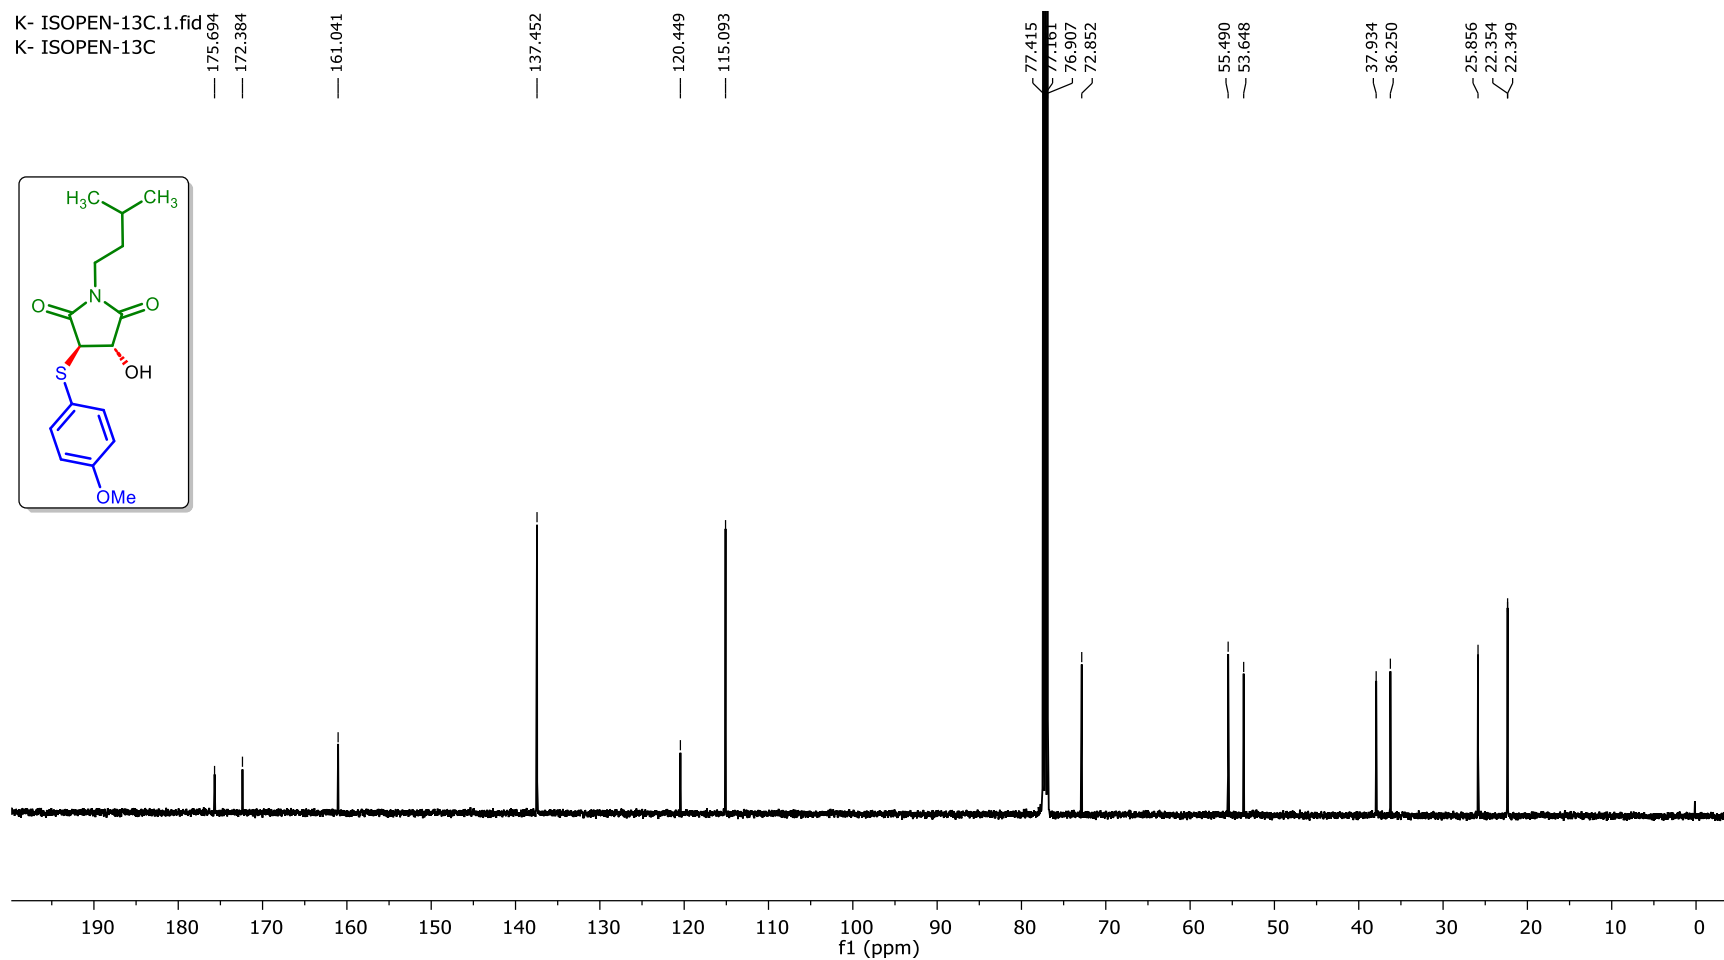

**(3*S*,4*R*)-3-Hydroxy-1-isopentyl-4-((4-methoxyphenyl)thio)pyrrolidine-2,5-dione (3ma):  $^{13}\text{C}\{^1\text{H}\}$  NMR ( $\text{CDCl}_3$ , 126 MHz)**

TK-HEX-1H.1.fid  
TK-HEX-1H

7.506  
7.491  
7.263  
6.856  
6.838

4.455  
4.449  
4.445  
4.439

3.804  
3.795

3.453  
3.439  
3.424

3.185

1.636  
1.464  
1.458  
1.448  
1.443  
1.433  
1.428  
1.418  
1.412  
1.404  
1.273  
1.270  
1.260  
1.255  
1.247  
1.247  
1.240  
1.234  
1.226  
1.221  
1.218  
1.212  
1.206  
1.203  
1.168  
1.155  
1.152  
1.140  
1.136  
1.136  
1.125  
1.120  
0.878  
0.865  
0.851  
-0.000

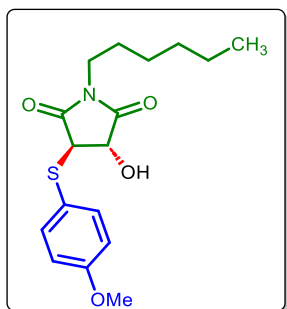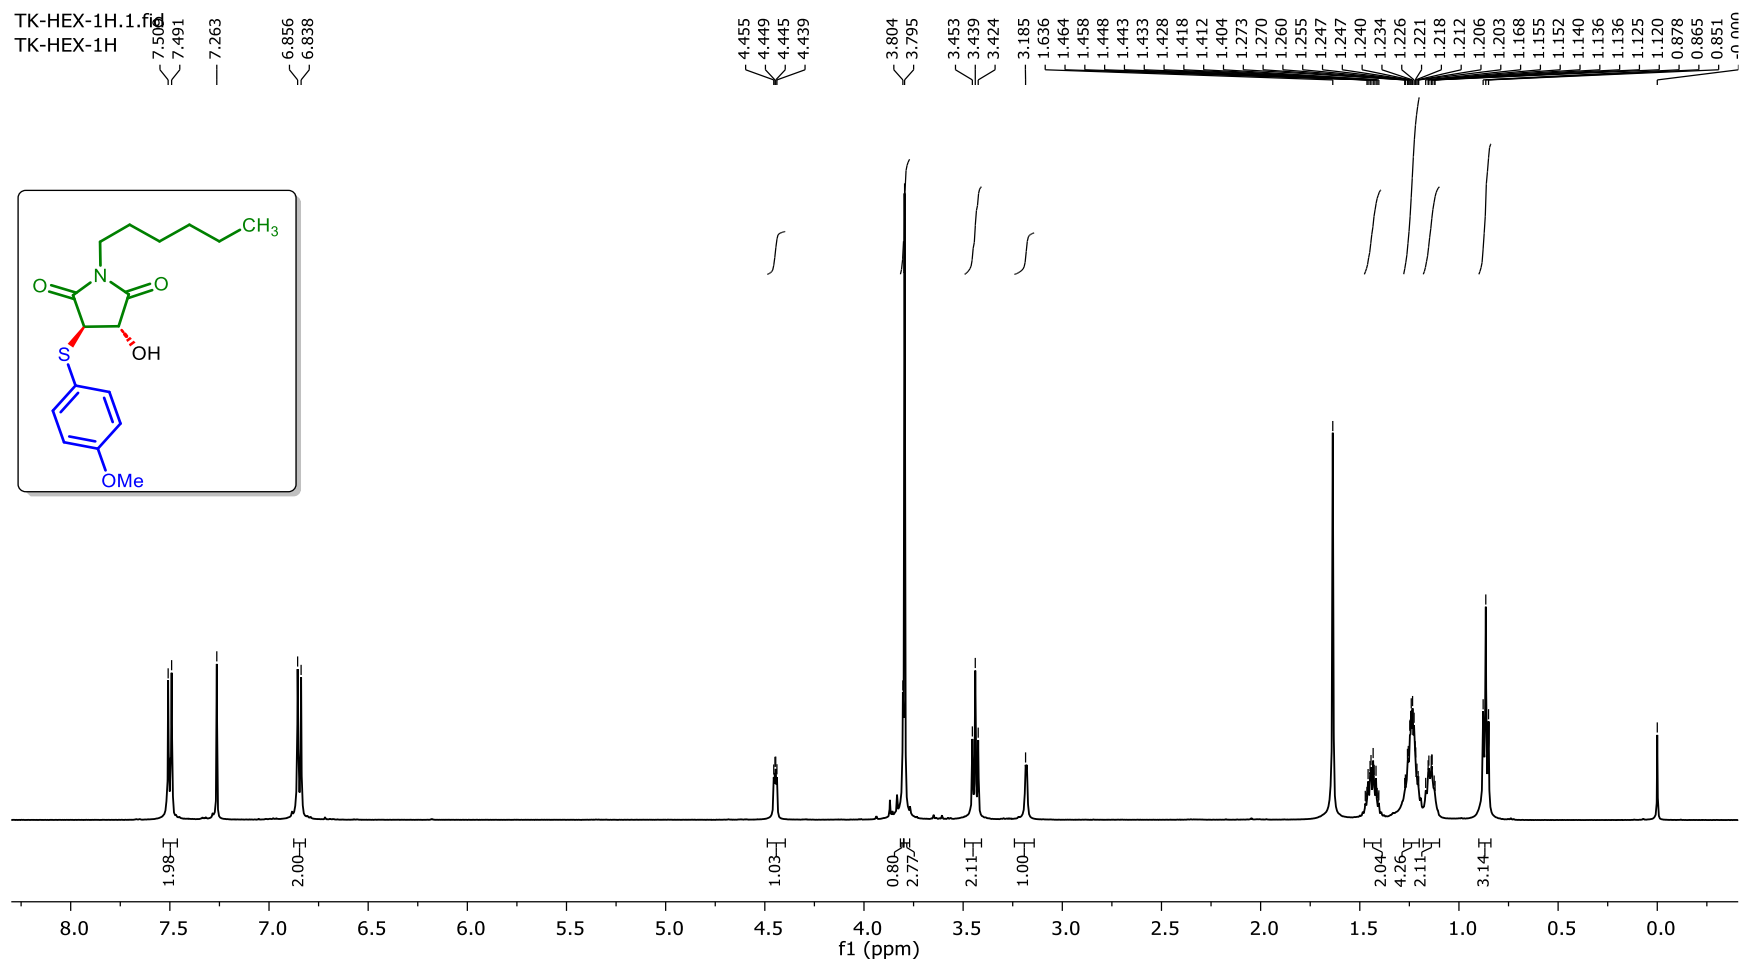

**(3S,4R)-1-Hexyl-3-hydroxy-4-((4-methoxyphenyl)thio)pyrrolidine-2,5-dione (3na): <sup>1</sup>H NMR (CDCl<sub>3</sub>, 500 MHz)**

TK-HEX-13C.1.fid  
TK-HEX-13C

— 175.667  
— 172.411  
— 161.051  
— 137.458  
— 120.423  
— 115.095  
77.415  
77.107  
76.907  
72.814  
55.480  
53.650  
39.504  
31.369  
27.546  
26.413  
22.572  
14.099

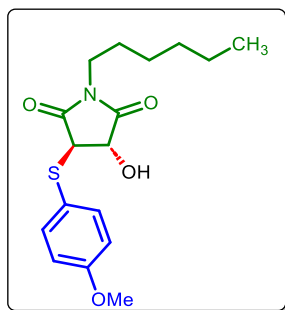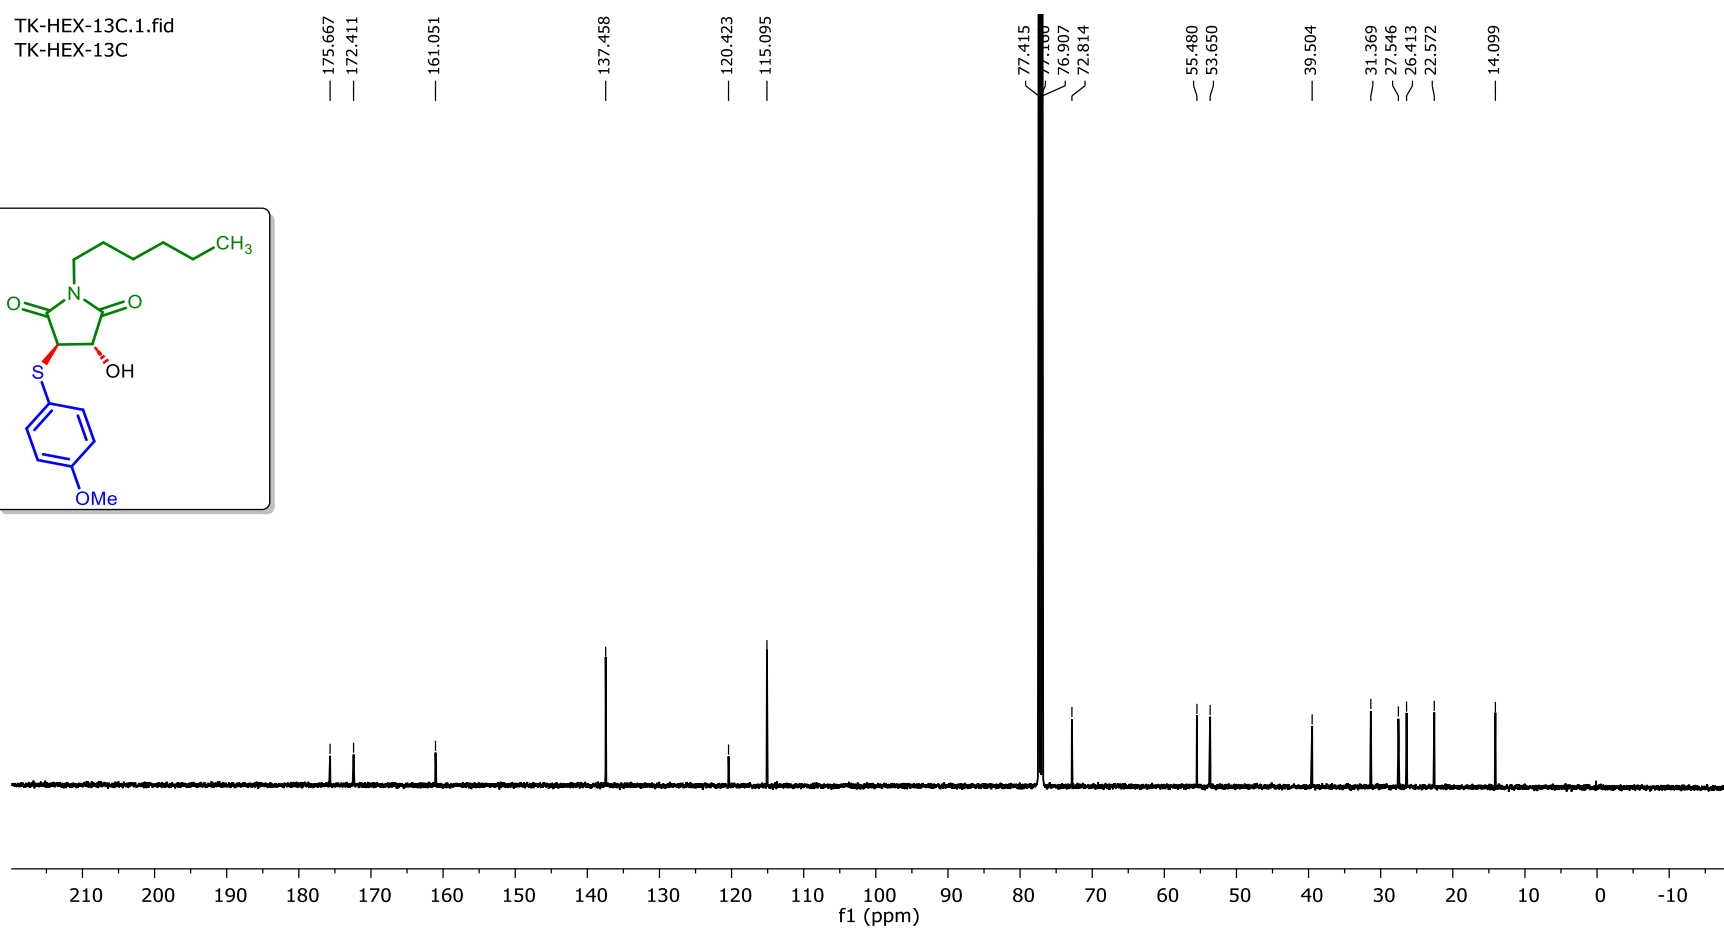

**(3*S*,4*R*)-1-Hexyl-3-hydroxy-4-((4-methoxyphenyl)thio)pyrrolidine-2,5-dione (3na): <sup>13</sup>C{<sup>1</sup>H} NMR (CDCl<sub>3</sub>, 126 MHz)**

TK-HEP-1H.1.fid  
TK-HEP-1H

7.508  
7.491  
7.265

6.855  
6.838

4.449  
4.444

3.805  
3.795  
3.452  
3.437  
3.422  
3.252  
1.657  
1.475  
1.467  
1.461  
1.451  
1.446  
1.436  
1.430  
1.421  
1.415  
1.408  
1.307  
1.293  
1.278  
1.264  
1.252  
1.245  
1.231  
1.221  
1.213  
1.162  
1.148  
1.133  
1.119  
1.104  
0.886  
0.873

-0.000

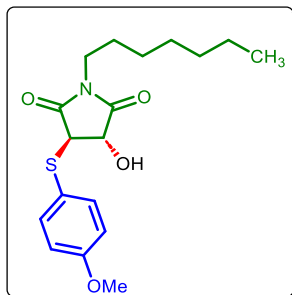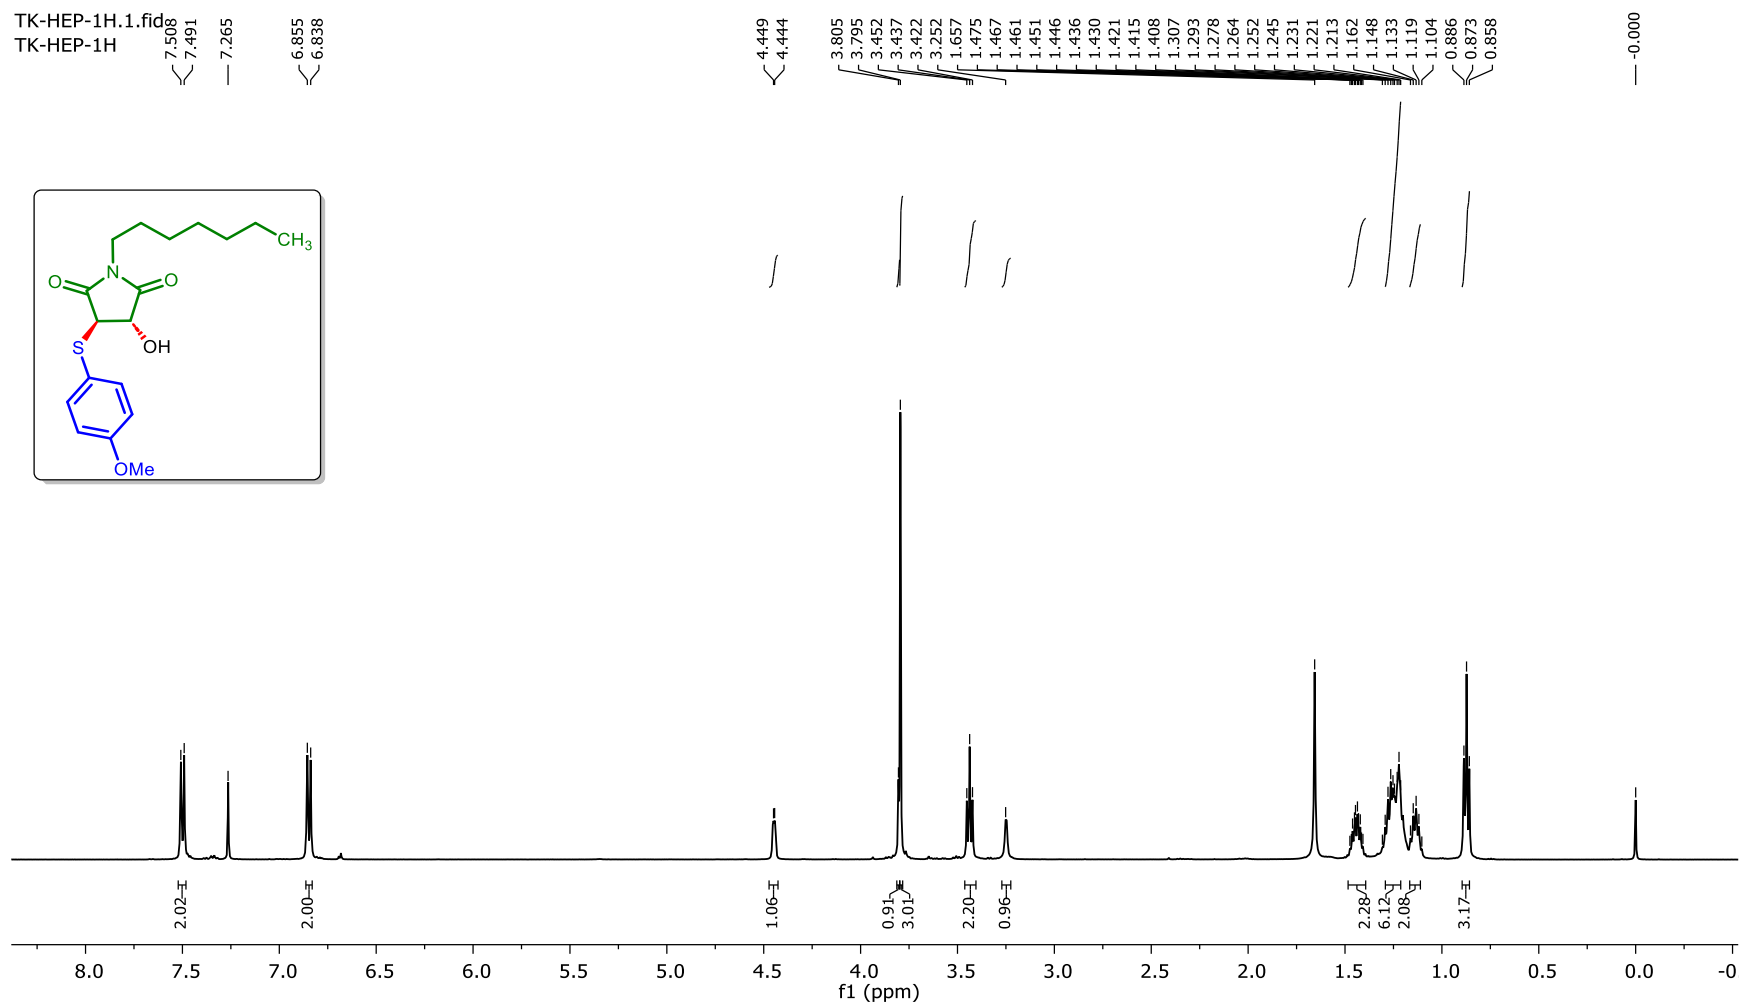

**(3S,4R)-1-Heptyl-3-hydroxy-4-((4-methoxyphenyl)thio)pyrrolidine-2,5-dione (30a): <sup>1</sup>H NMR (CDCl<sub>3</sub>, 500 MHz)**

TK-HEP-13C.1.f1  
TK-HEP-13C

— 175.788

— 172.434

— 161.043

— 137.447

— 120.428

— 115.093

77.414

77.160

76.907

72.794

— 55.481

— 53.650

— 39.505

— 31.745

— 28.872

— 27.587

— 26.703

— 22.686

— 14.166

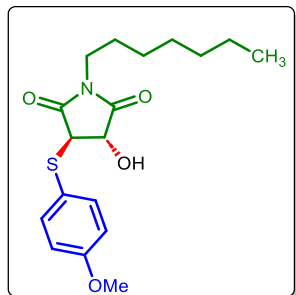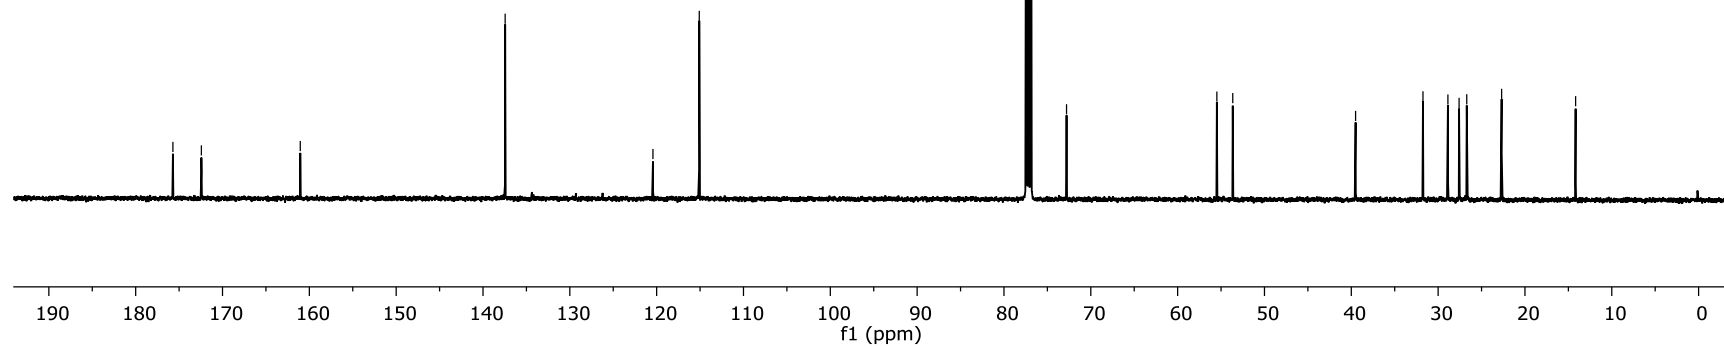

**(3*S*,4*R*)-1-Heptyl-3-hydroxy-4-((4-methoxyphenyl)thio)pyrrolidine-2,5-dione (3oa):  $^{13}\text{C}\{^1\text{H}\}$  NMR ( $\text{CDCl}_3$ , 126 MHz)**



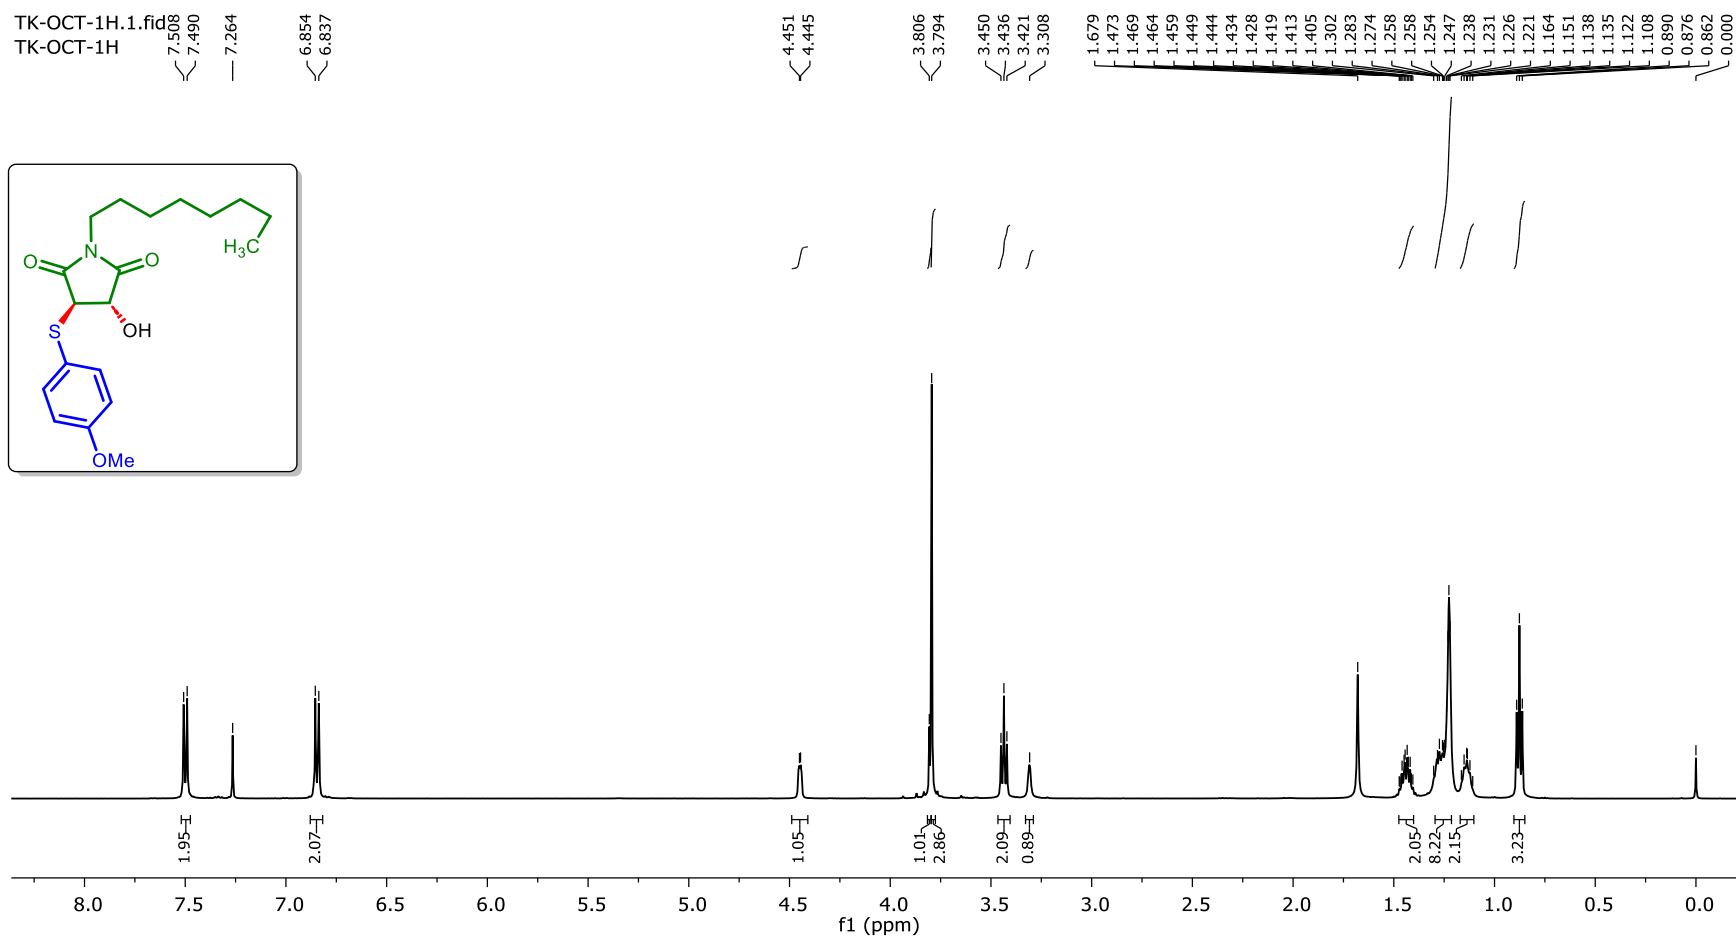

**(3*S*,4*R*)-3-Hydroxy-4-((4-methoxyphenyl)thio)-1-octylpyrrolidine-2,5-dione (3pa): <sup>1</sup>H NMR (CDCl<sub>3</sub>, 500 MHz)**

TK-OCT-13C.1.1  
TK-OCT-13C

— 175.788  
— 172.448  
— 161.038

— 137.438

— 120.435

— 115.091

77.414  
77.161  
76.906  
72.790

— 55.479  
— 53.651

— 39.506

31.883  
29.215  
29.165  
27.582  
26.750  
22.743

— 14.206

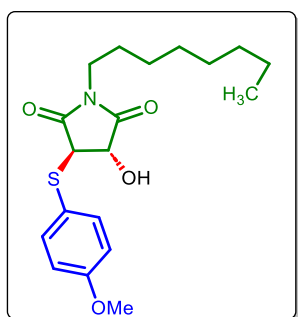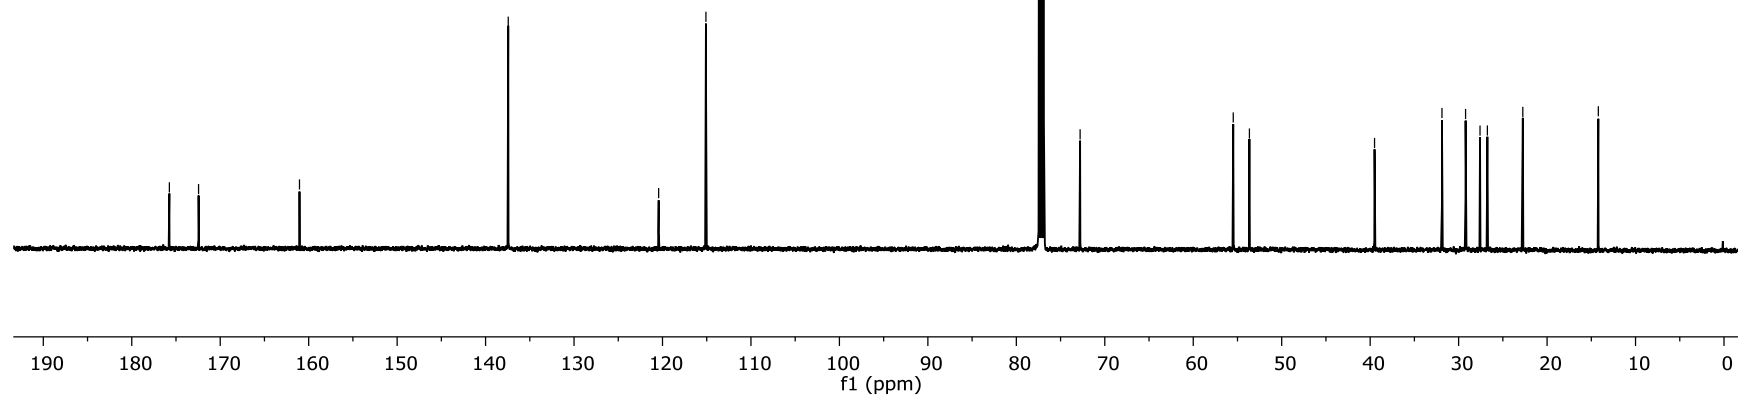

**(3S,4R)-3-Hydroxy-4-((4-methoxyphenyl)thio)-1-octylpyrrolidine-2,5-dione (3pa):  $^{13}\text{C}\{^1\text{H}\}$  NMR ( $\text{CDCl}_3$ , 126 MHz)**

TK-DECYL-1H.1.f1  
TK-DECYL-1H

7.516  
7.489  
7.264  
6.858  
6.836

4.447  
4.436

3.803  
3.795

3.455  
3.436  
3.418  
3.198

1.634  
1.464  
1.454  
1.445  
1.435  
1.425  
1.417  
1.279  
1.257  
1.253  
1.235  
1.227  
1.216  
1.169  
1.153  
1.135  
1.117  
0.897  
0.880  
0.863

-0.000

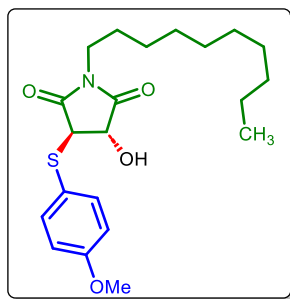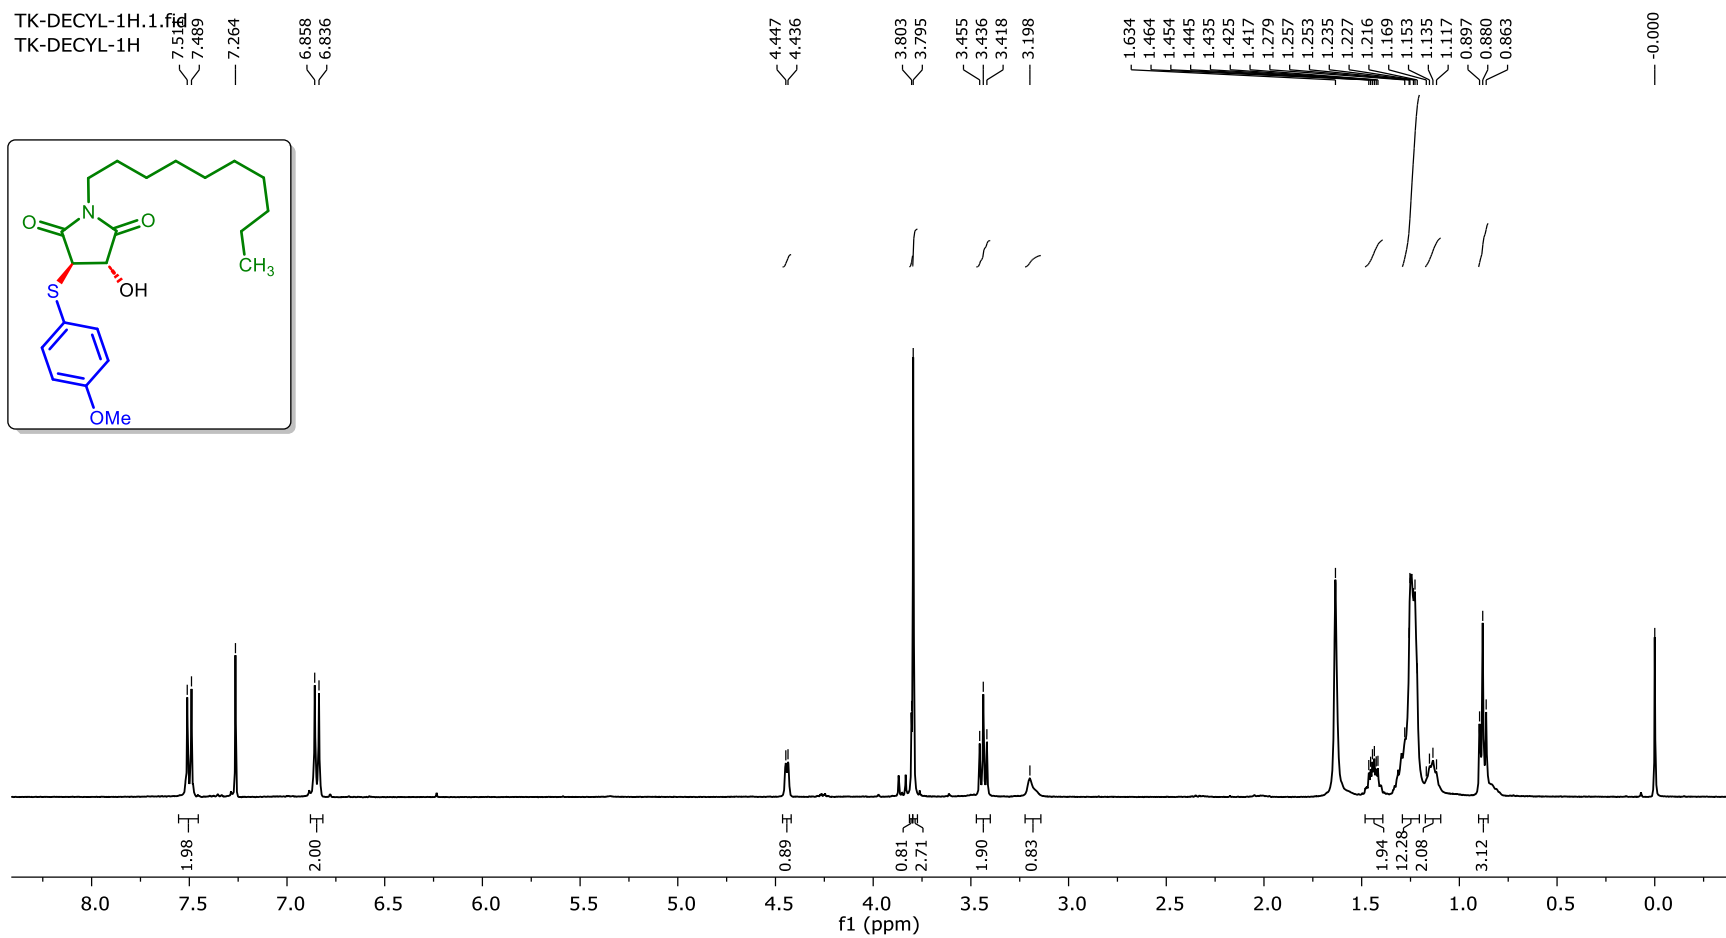

(3S,4R)-1-Decyl-3-hydroxy-4-((4-methoxyphenyl)thio)pyrrolidine-2,5-dione (3qa): <sup>1</sup>H NMR (CDCl<sub>3</sub>, 400 MHz)

TK-DECYL-13C  
TK-DECYL-13C

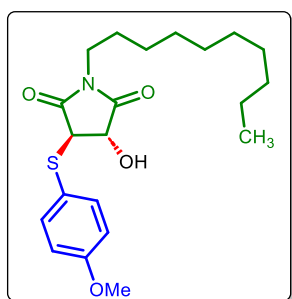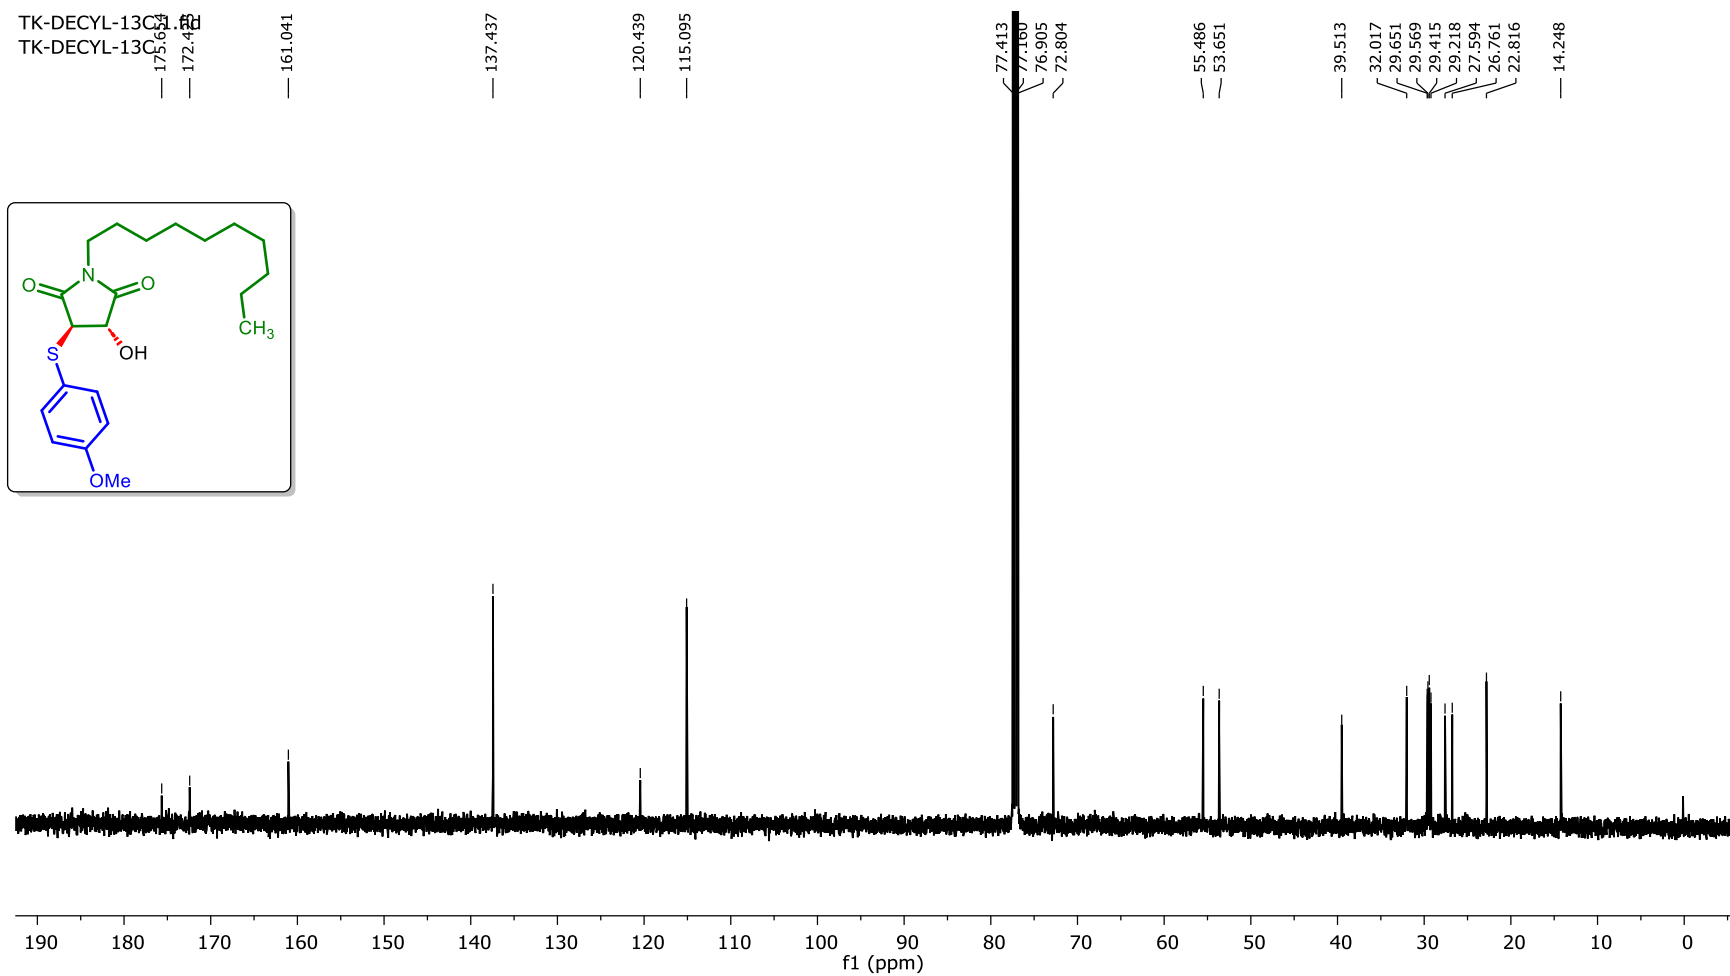

**(3*S*,4*R*)-1-Decyl-3-hydroxy-4-((4-methoxyphenyl)thio)pyrrolidine-2,5-dione (3qa):  $^{13}\text{C}\{^1\text{H}\}$  NMR ( $\text{CDCl}_3$ , 126 MHz)**

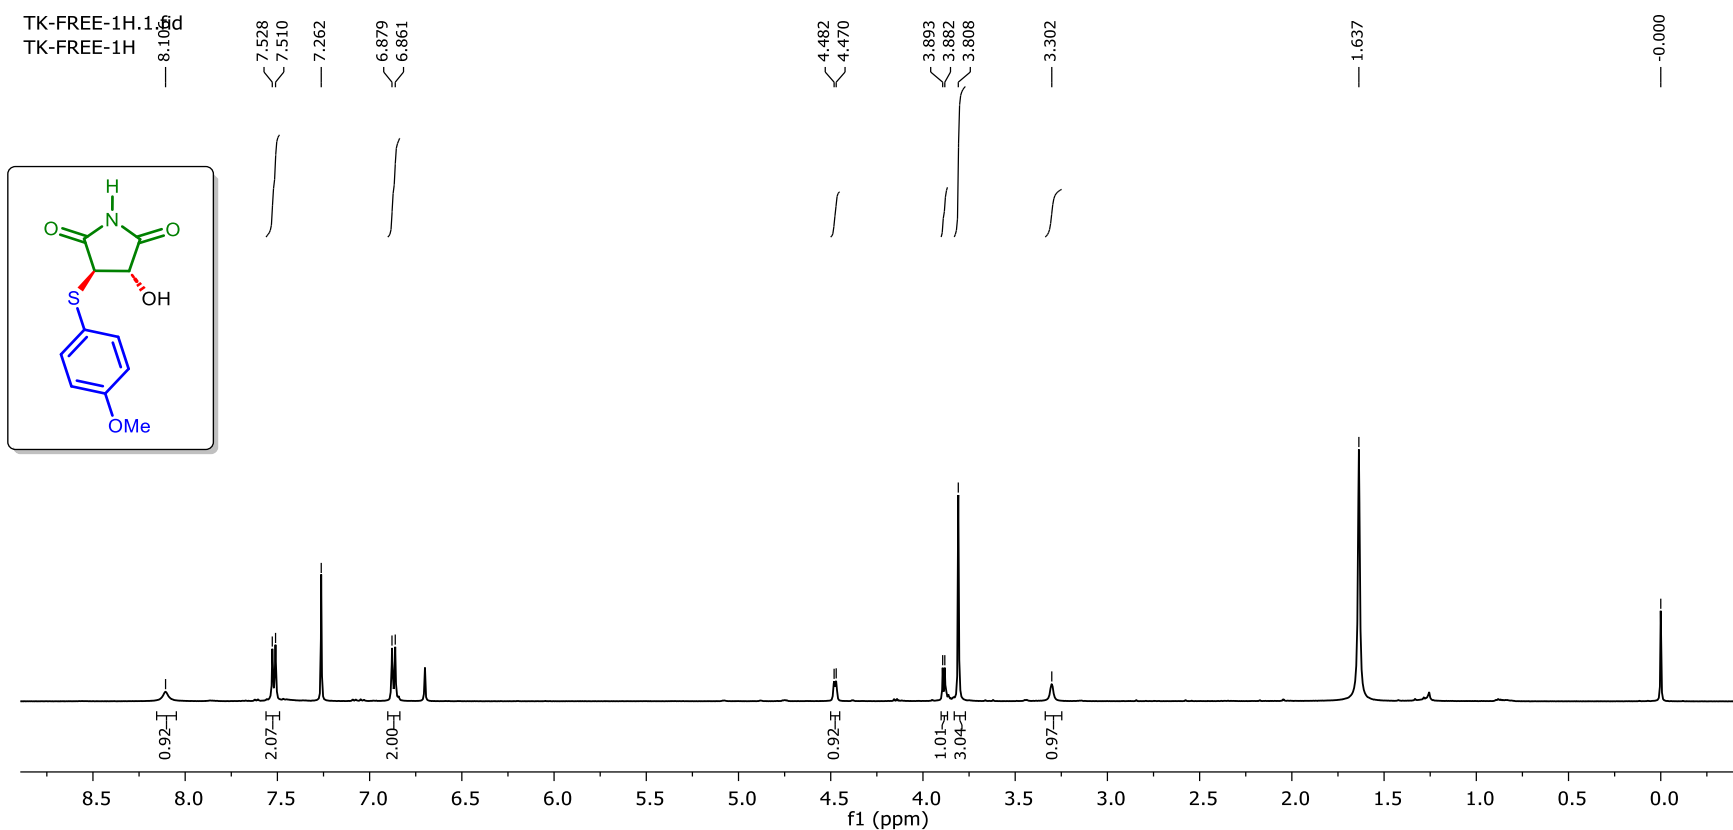

**(3S,4R)-3-Hydroxy-4-((4-methoxyphenyl)thio)pyrrolidine-2,5-dione (3ra):  $^1\text{H}$  NMR ( $\text{CDCl}_3$ , 500 MHz)**

TK-FREE-13C.3.fid  
TK-FREE-13C

— 175.058  
— 171.754

— 161.106

— 137.398  
— 135.274

— 115.262

— 77.414  
— 77.002  
— 76.906  
— 73.450

— 55.535  
— 54.932

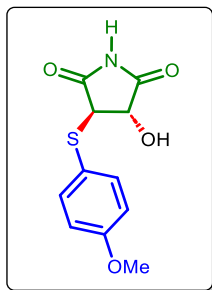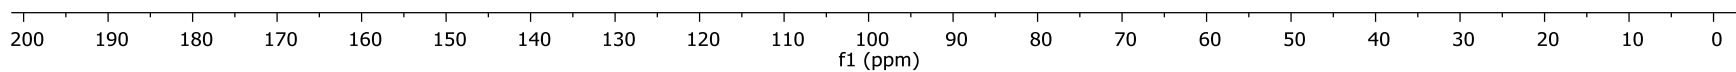

**(3*S*,4*R*)-3-Hydroxy-4-((4-methoxyphenyl)thio)pyrrolidine-2,5-dione (3ra):  $^{13}\text{C}\{^1\text{H}\}$  NMR ( $\text{CDCl}_3$ , 126 MHz)**

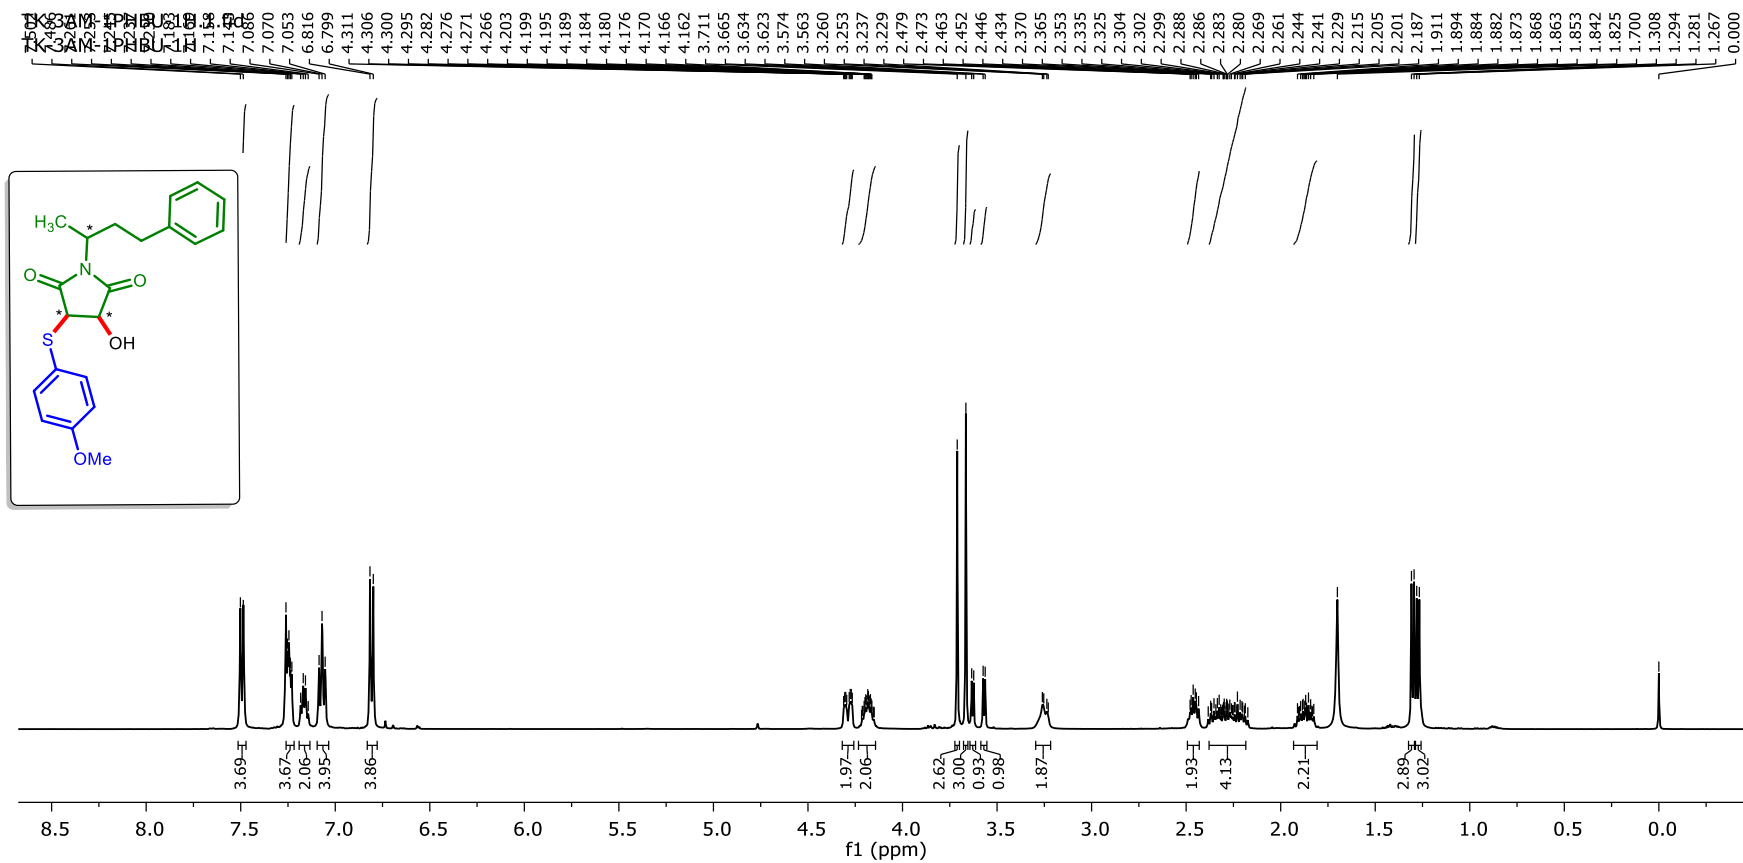

**3-Hydroxy-4-((4-methoxyphenyl)thio)-1-(4-phenylbutan-2-yl)pyrrolidine-2,5-dione (3sa): <sup>1</sup>H NMR (CDCl<sub>3</sub>, 500 MHz)**





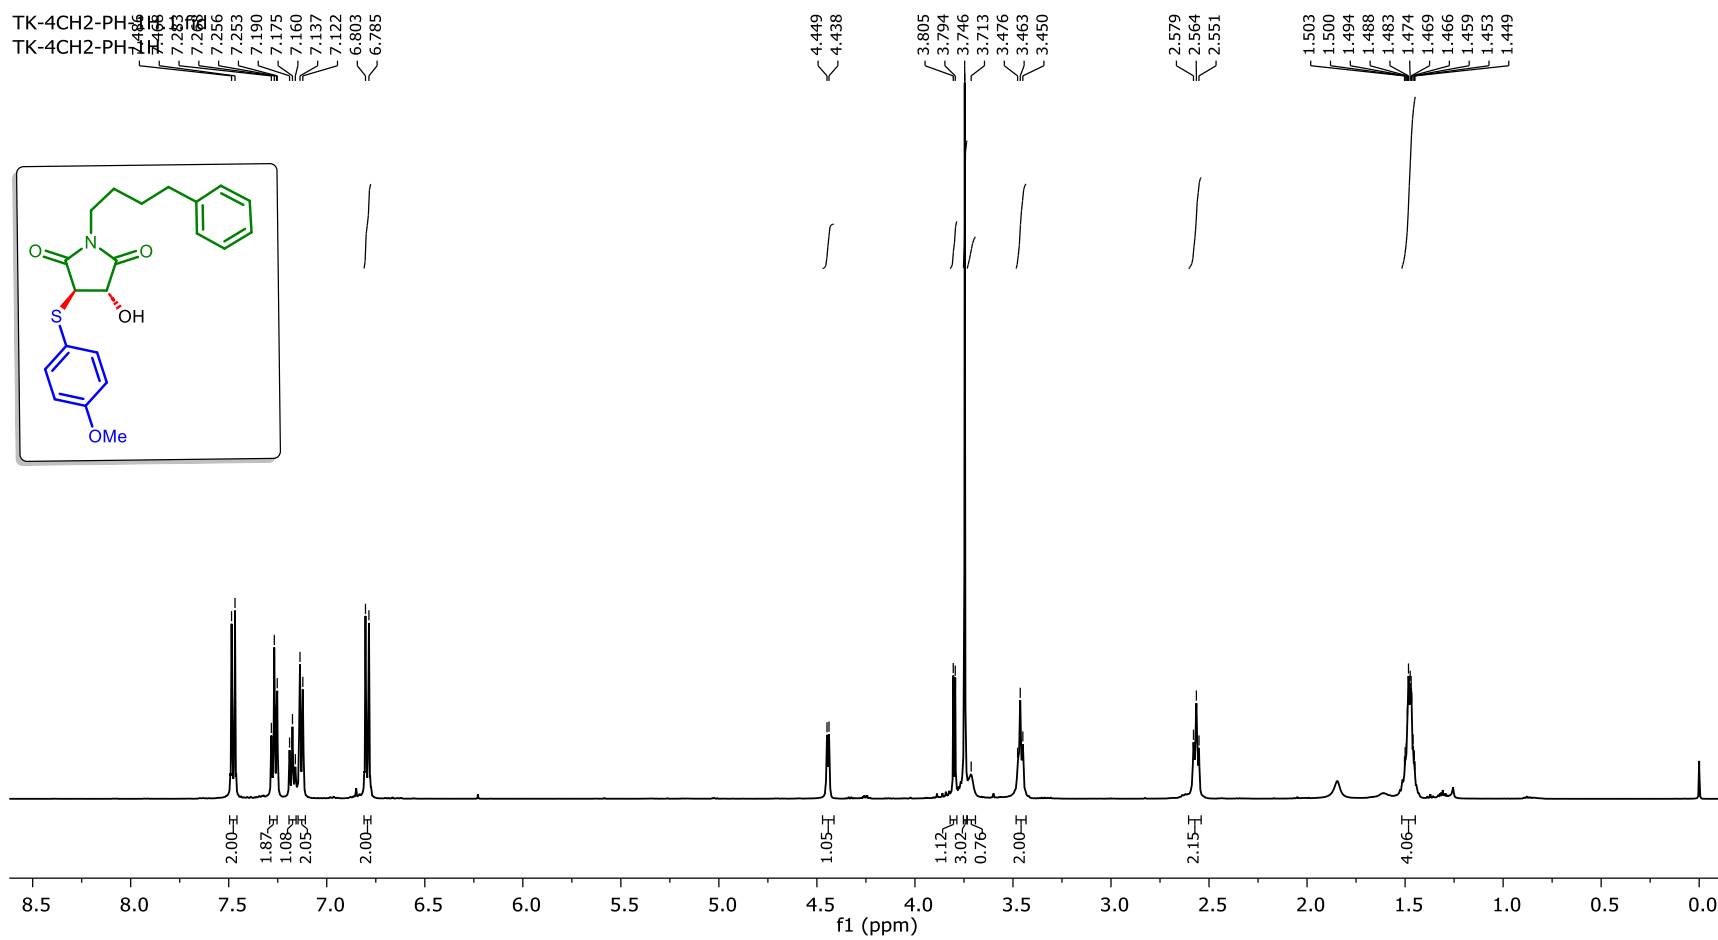

**(3S,4R)-3-Hydroxy-4-((4-methoxyphenyl)thio)-1-(4-phenylbutyl)pyrrolidine-2,5-dione (3ta):  $^1\text{H}$  NMR ( $\text{CDCl}_3$ , 500 MHz)**

TK-4CH2-PH-13C  
TK-4CH2-PH-13C

175.942  
172.549

160.995

141.806

137.424

128.489

126.017

120.332

115.074

77.415

77.160

76.907

72.636

55.452

53.648

39.127

35.235

28.346

27.073

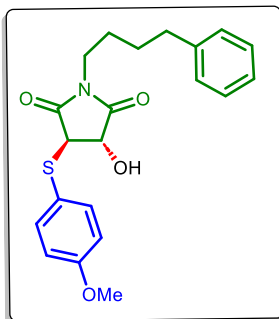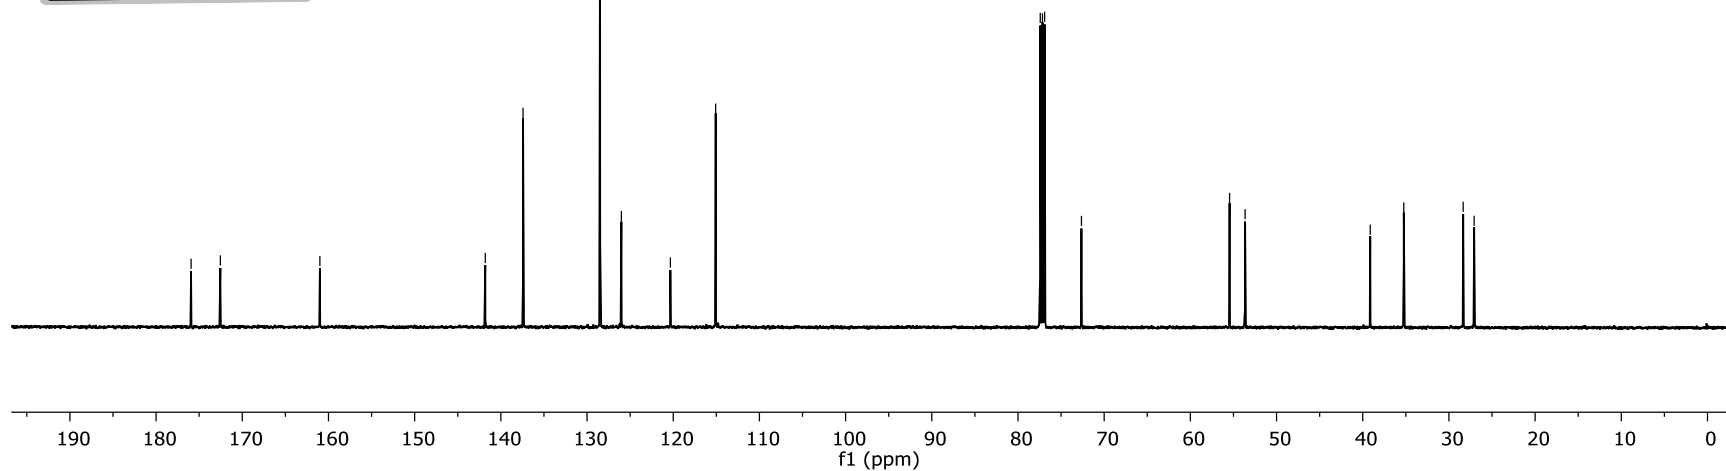

**(3S,4R)-3-Hydroxy-4-((4-methoxyphenyl)thio)-1-(4-phenylbutyl)pyrrolidine-2,5-dione (3ta):  $^{13}\text{C}\{^1\text{H}\}$  NMR ( $\text{CDCl}_3$ , 126 MHz)**

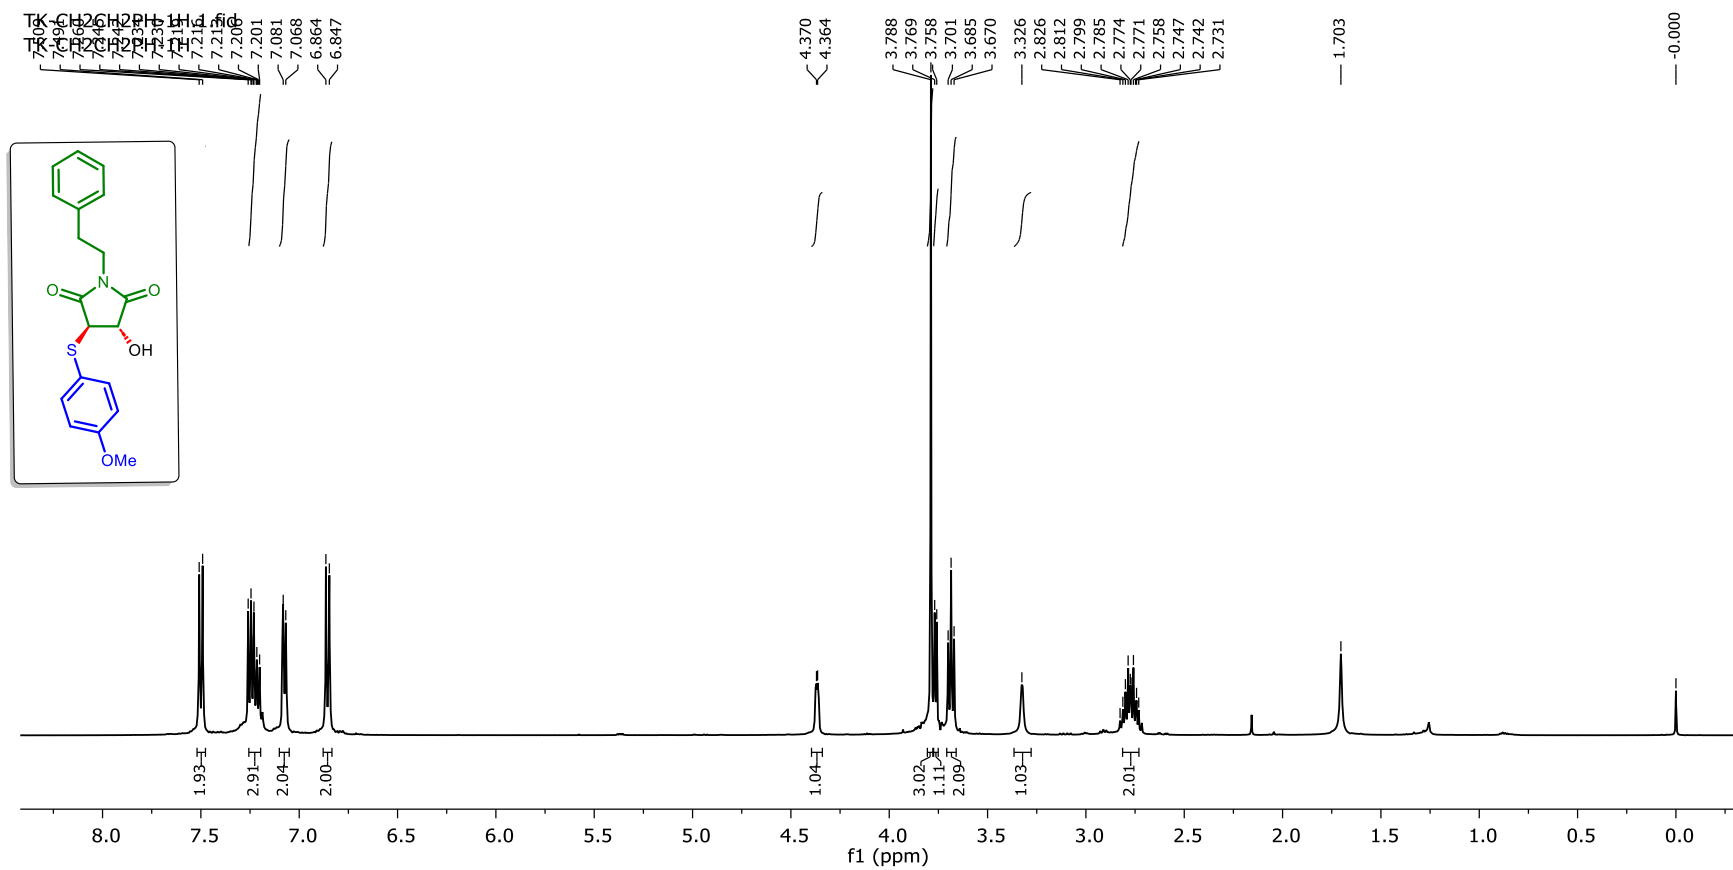

(3*S*,4*R*)-3-Hydroxy-4-((4-methoxyphenyl)thio)-1-phenethylpyrrolidine-2,5-dione (3ua): <sup>1</sup>H NMR (CDCl<sub>3</sub>, 500 MHz)

TK-CH2-CH2-Ph-13C.1.tif  
TK-CH2-CH2-Ph-13C

137.443  
137.379  
128.916  
128.727  
126.969  
120.497  
115.128

77.413  
77.160  
76.905  
72.616

55.519  
53.725

40.525  
33.528

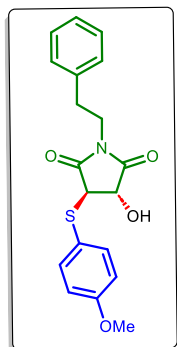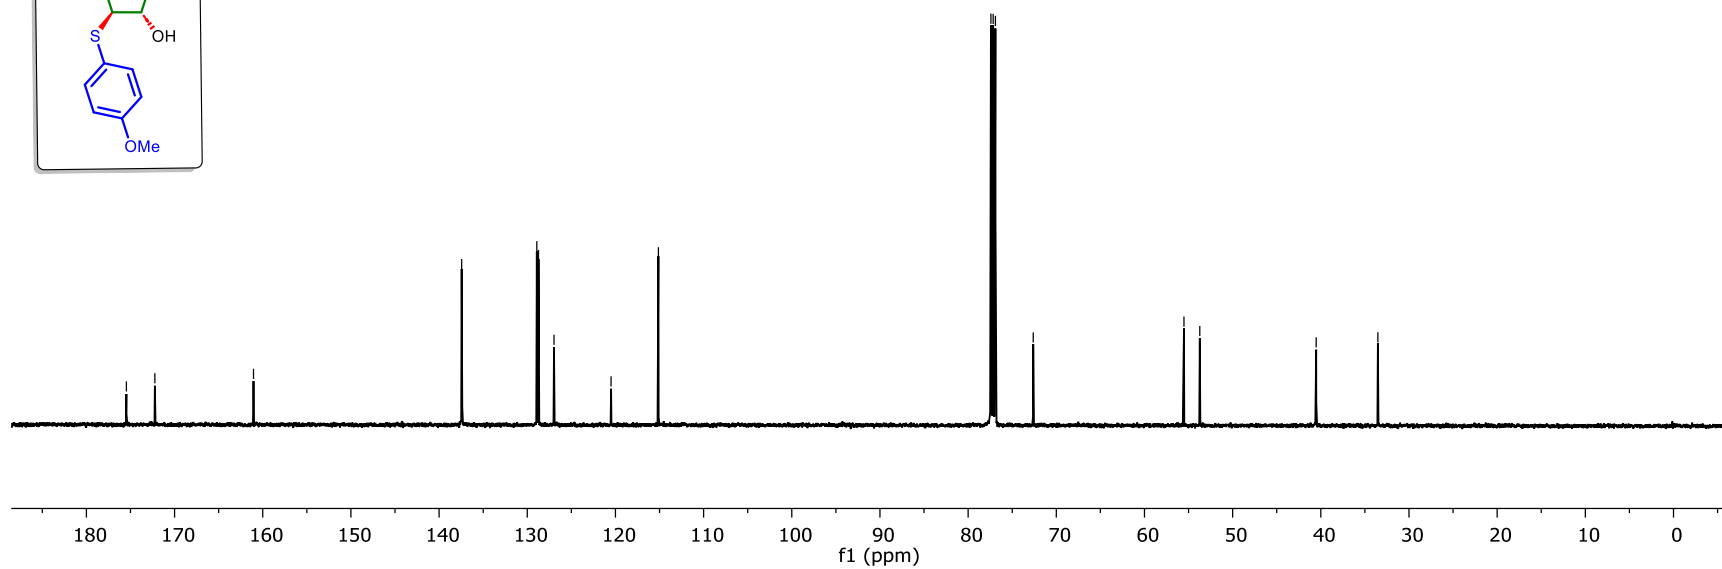

**(3S,4R)-3-Hydroxy-4-((4-methoxyphenyl)thio)-1-phenethylpyrrolidine-2,5-dione (3ua):  $^{13}\text{C}\{^1\text{H}\}$  NMR ( $\text{CDCl}_3$ , 126 MHz)**

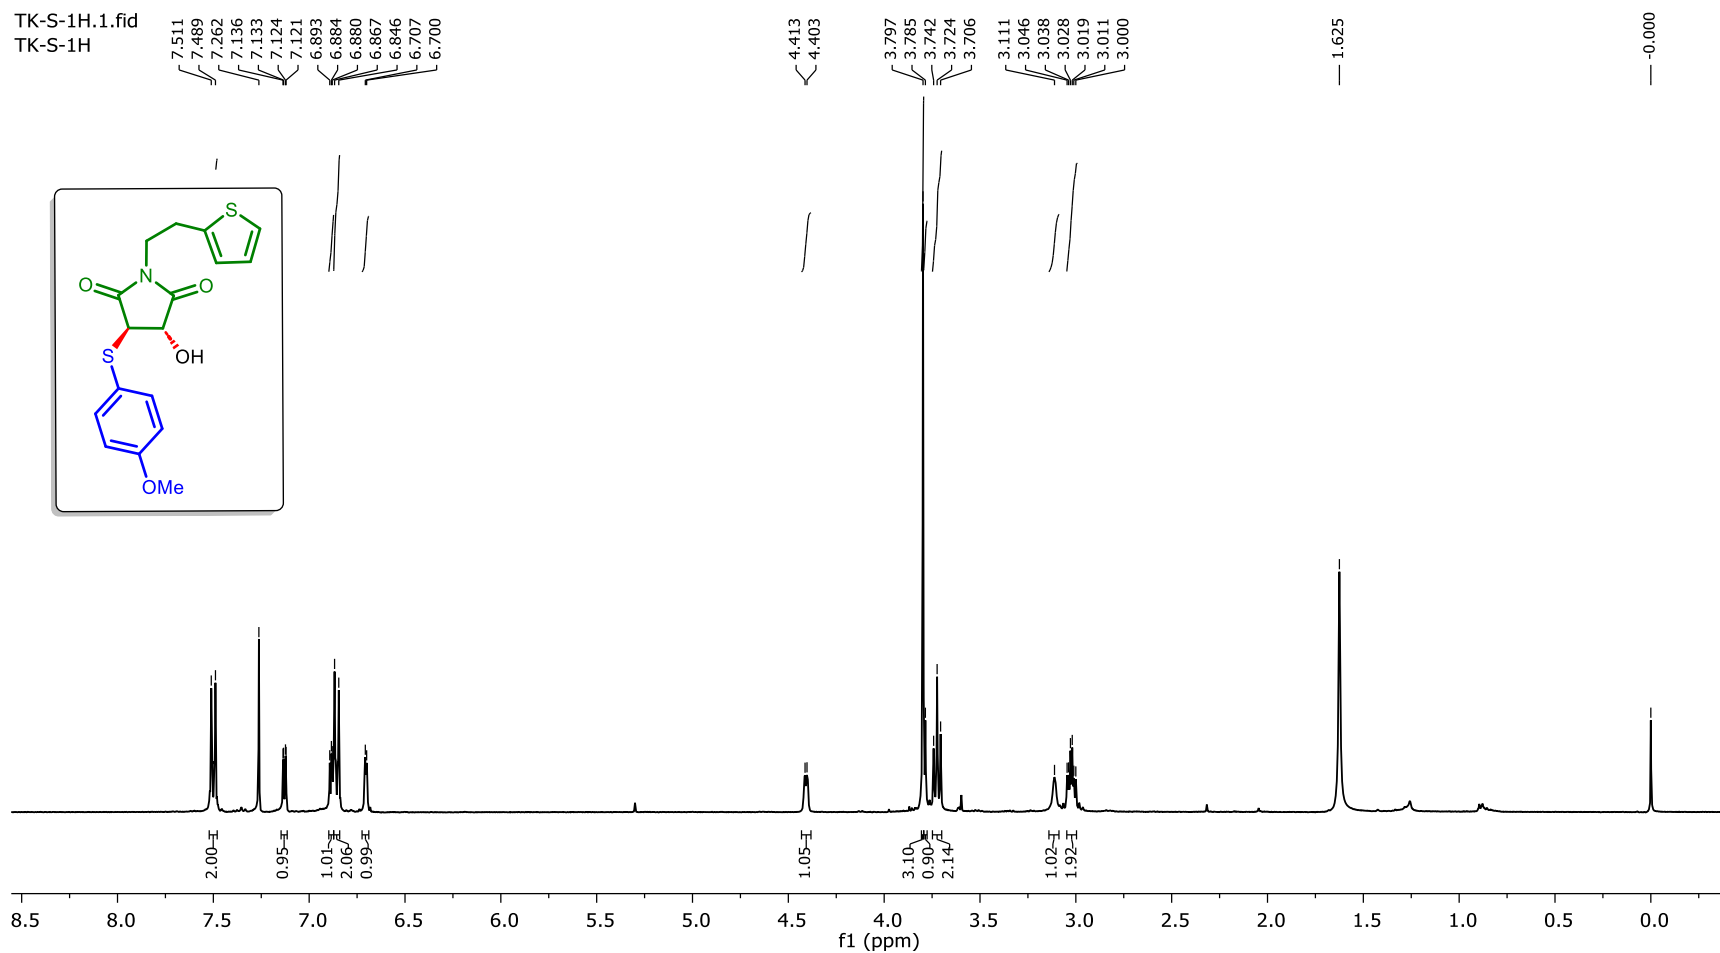

**(3S,4R)-3-Hydroxy-4-((4-methoxyphenyl)thio)-1-(2-(thiophen-2-yl)ethyl)pyrrolidine-2,5-dione (3va):  $^1\text{H}$  NMR ( $\text{CDCl}_3$ , 400 MHz)**

TK-S-13C.1.fid  
TK-S-13C

— 175.269  
— 172.136

— 161.077

— 139.305  
— 137.431

— 127.150  
— 125.954  
— 124.510  
— 120.498

— 115.166

— 77.414  
— 77.160  
— 76.906  
— 72.704

— 55.536  
— 53.774

— 40.579

— 27.506

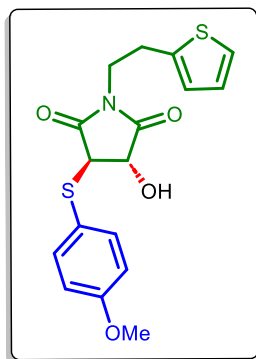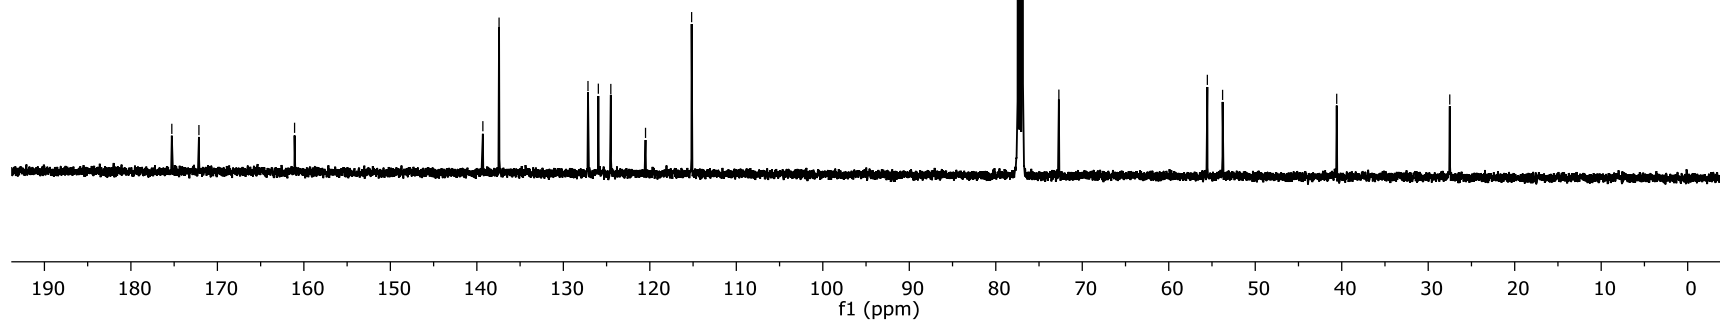

**(3*S*,4*R*)-3-Hydroxy-4-((4-methoxyphenyl)thio)-1-(2-(thiophen-2-yl)ethyl)pyrrolidine-2,5-dione (3va):  $^{13}\text{C}\{^1\text{H}\}$  NMR ( $\text{CDCl}_3$ , 126 MHz)**

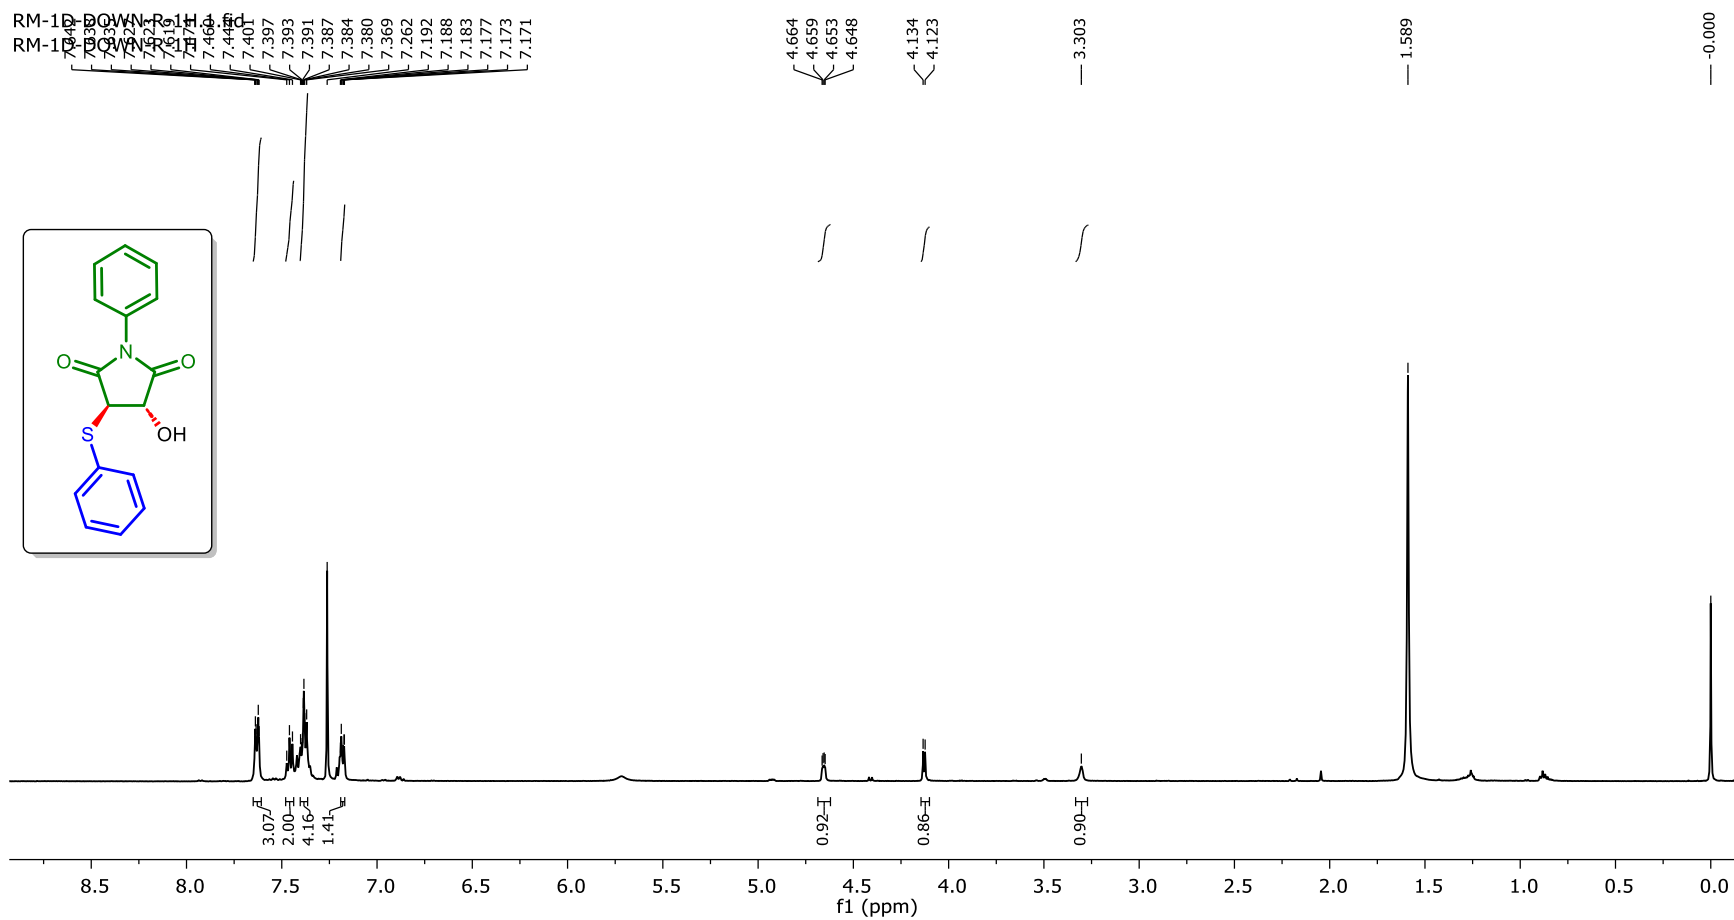

(3S,4R)-3-Hydroxy-1-phenyl-4-(phenylthio)pyrrolidine-2,5-dione (3ab): <sup>1</sup>H NMR (CDCl<sub>3</sub>, 500 MHz)

RM-1D-DOWN-R-13C.1  
RM-1D-DOWN-13C

174.526  
171.500

134.621  
129.687  
129.526  
129.424  
129.410  
129.244  
126.278  
125.630  
119.878

77.414  
77.100  
76.906  
73.357

53.271

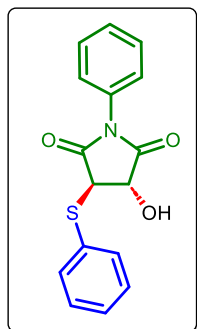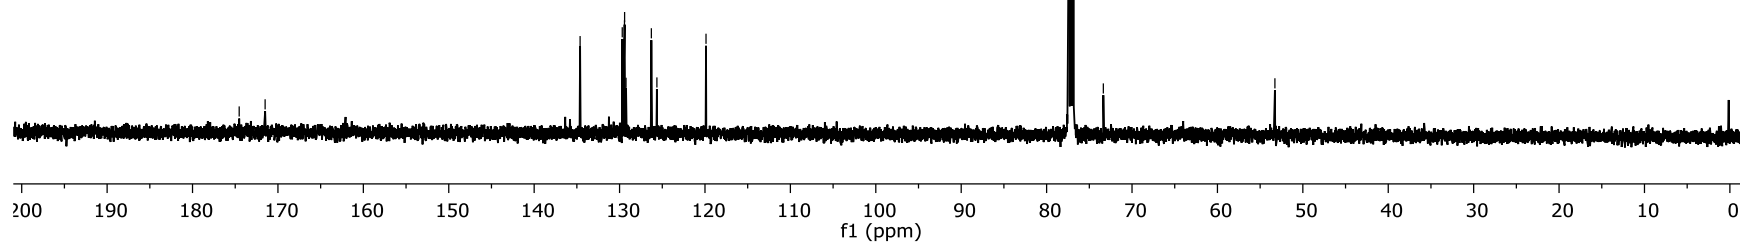

**(3*S*,4*R*)-3-Hydroxy-1-phenyl-4-(phenylthio)pyrrolidine-2,5-dione (3ab):  $^{13}\text{C}\{^1\text{H}\}$  NMR ( $\text{CDCl}_3$ , 126 MHz)**



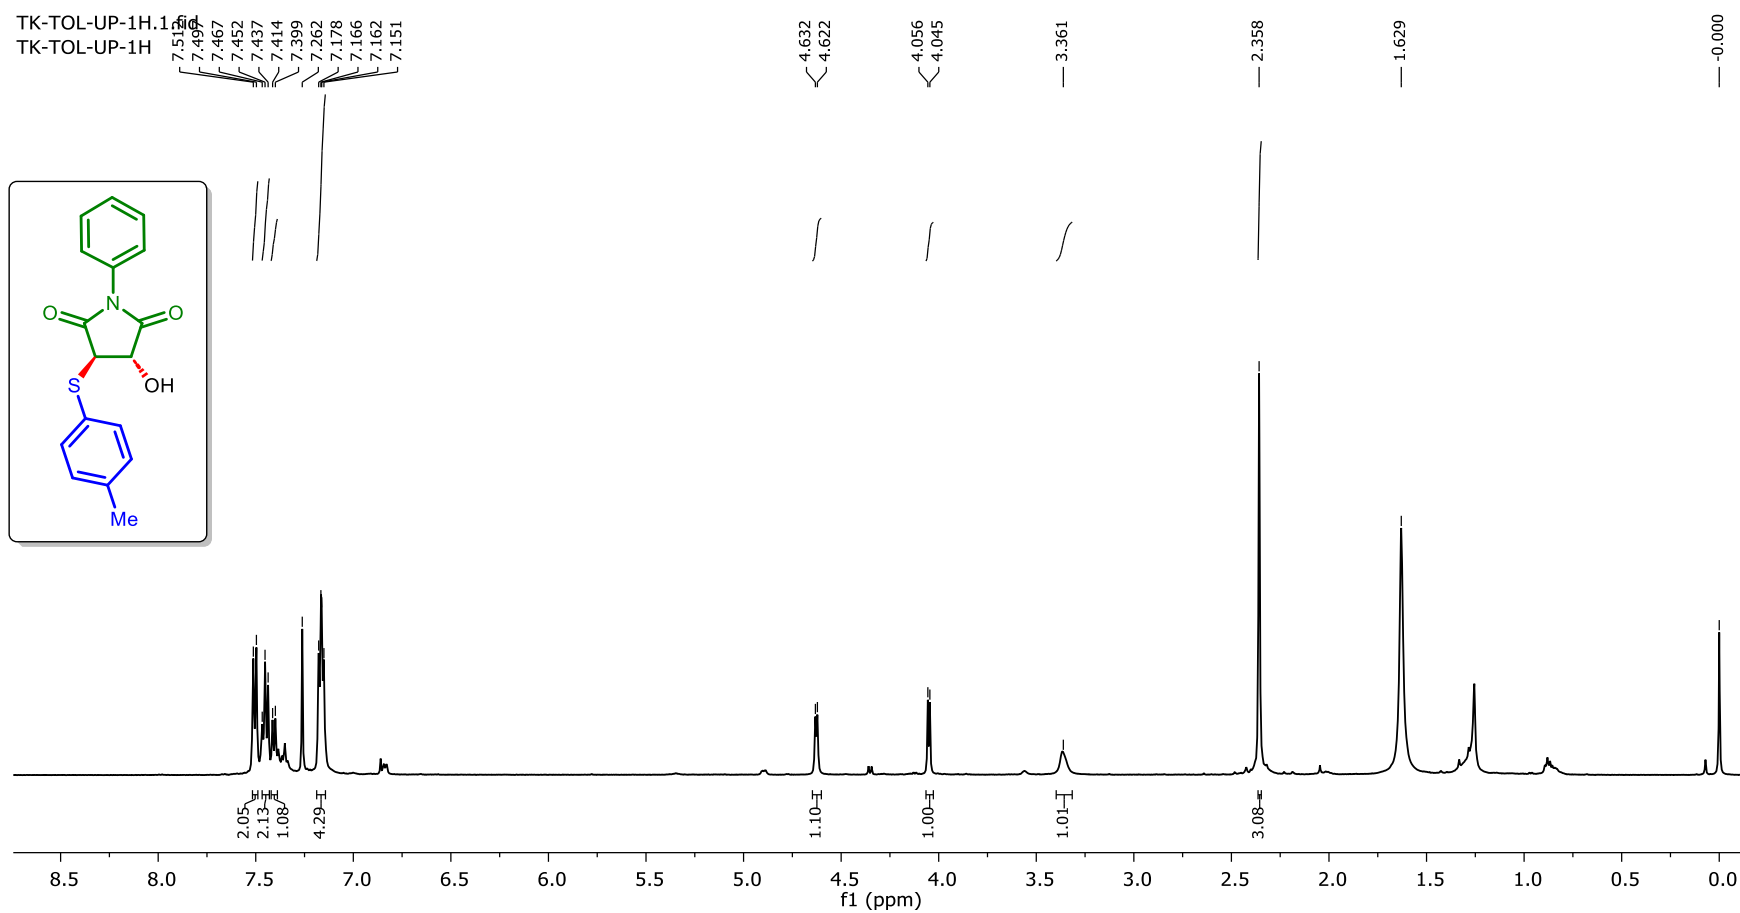

**(3*S*,4*R*)-3-Hydroxy-1-phenyl-4-(*p*-tolylthio)pyrrolidine-2,5-dione (3ac): <sup>1</sup>H NMR (CDCl<sub>3</sub>, 500 MHz)**

TK-TOL-UP-13C.1.fid  
TK-TOL-UP-13C

— 174.680  
— 171.619

— 140.133  
— 135.223  
— 131.284  
— 130.474  
— 129.385  
— 129.195  
— 126.658  
— 126.293

— 77.415  
— 77.161  
— 76.907  
— 73.127

— 53.405

— 21.374

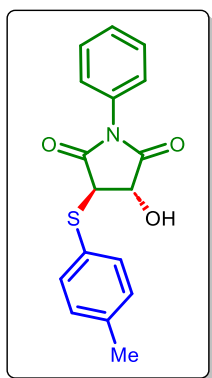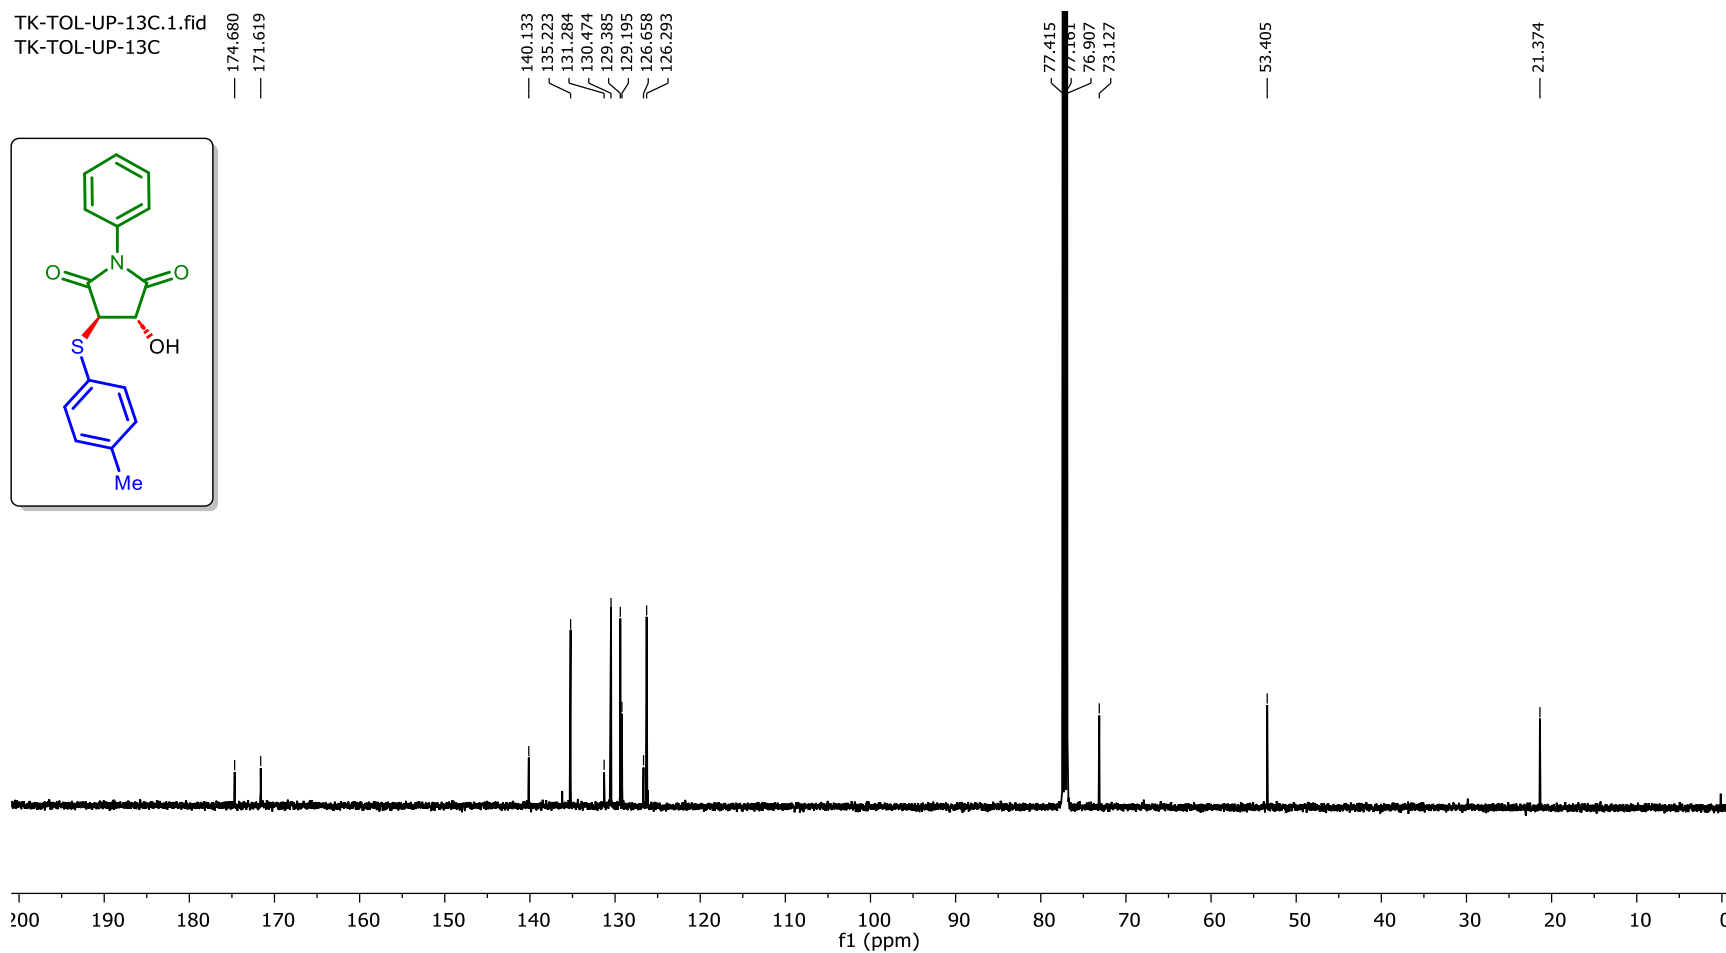

**(3*S*,4*R*)-3-Hydroxy-1-phenyl-4-(*p*-tolylthio)pyrrolidine-2,5-dione (3ac):  $^{13}\text{C}\{^1\text{H}\}$  NMR ( $\text{CDCl}_3$ , 126 MHz)**

TK-4CL-UP-1H.1.1  
TK-4CL-UP-1H

7.584  
7.563  
7.474  
7.469  
7.459  
7.455  
7.439  
7.435  
7.431  
7.423  
7.417  
7.411  
7.350  
7.329  
7.262  
7.217  
7.199

4.634  
4.620

4.126  
4.112

3.432

1.615

0.000

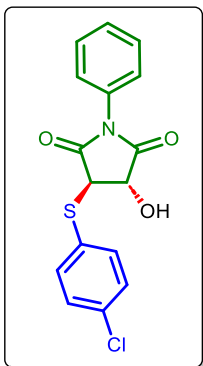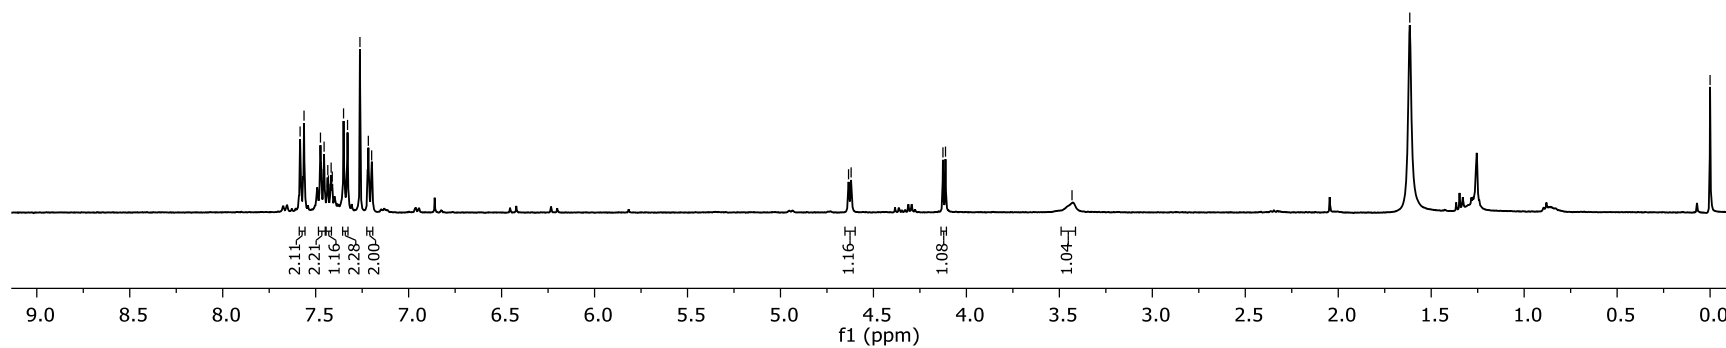

**(3R,4S)-3-((4-Chlorophenyl)thio)-4-hydroxy-1-phenylpyrrolidine-2,5-dione (3ad):  $^1\text{H}$  NMR ( $\text{CDCl}_3$ , 400 MHz)**

TK-4CL-UP-13C.1.f16  
TK-4CL-UP-13C

— 174.468  
— 171.277

135.917  
135.694  
131.144  
129.839  
129.467  
129.437  
129.314  
126.210

77.414  
77.100  
76.906  
73.292

— 53.453

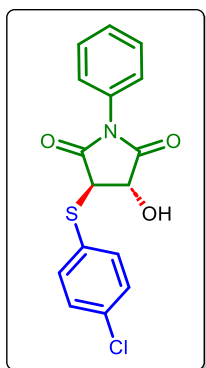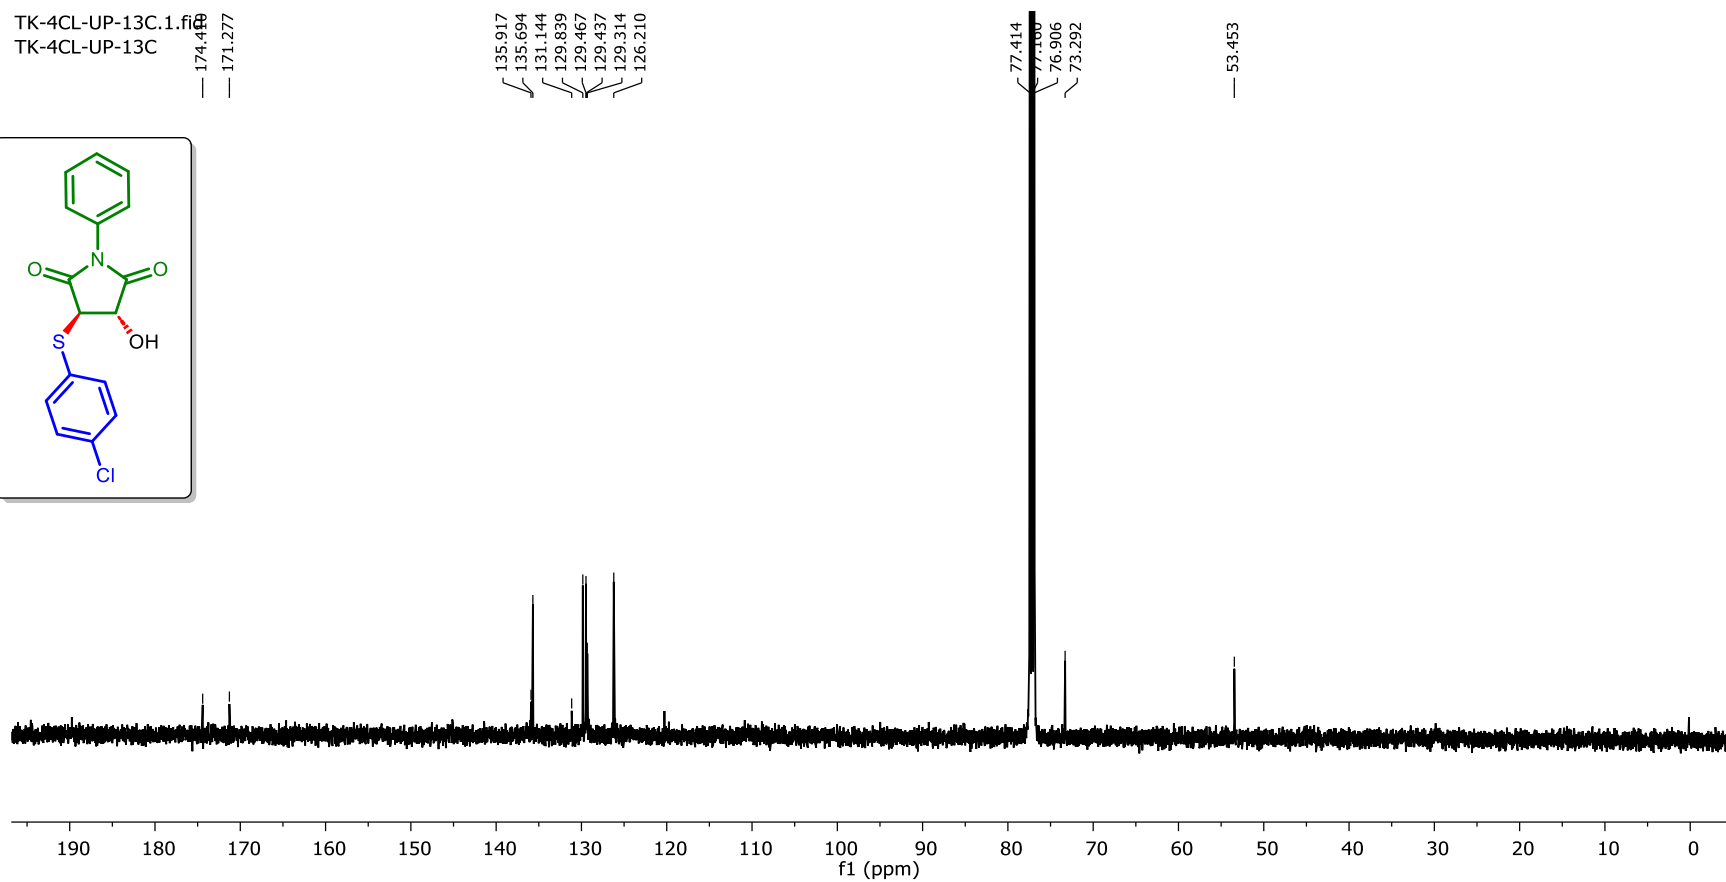

**(3R,4S)-3-((4-Chlorophenyl)thio)-4-hydroxy-1-phenylpyrrolidine-2,5-dione (3ad):  $^{13}\text{C}\{^1\text{H}\}$  NMR ( $\text{CDCl}_3$ , 126 MHz)**

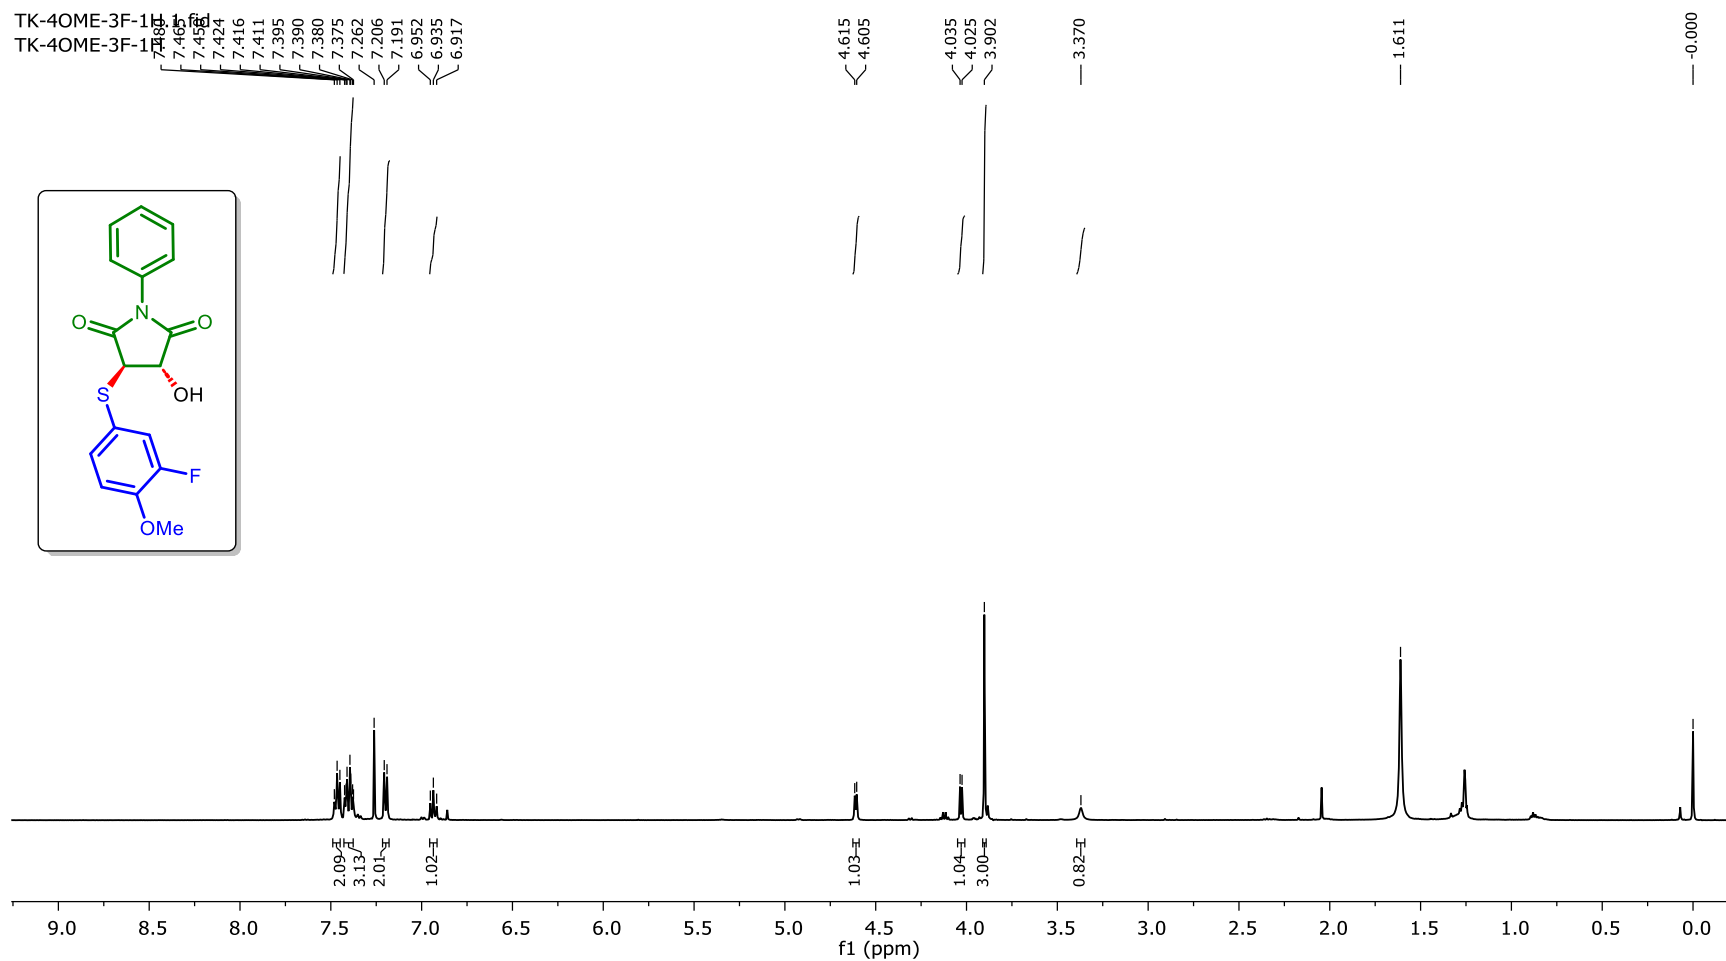

**(3R,4S)-3-((3-Fluoro-4-methoxyphenyl)thio)-4-hydroxy-1-phenylpyrrolidine-2,5-dione (3ae): <sup>1</sup>H NMR (CDCl<sub>3</sub>, 500 MHz)**

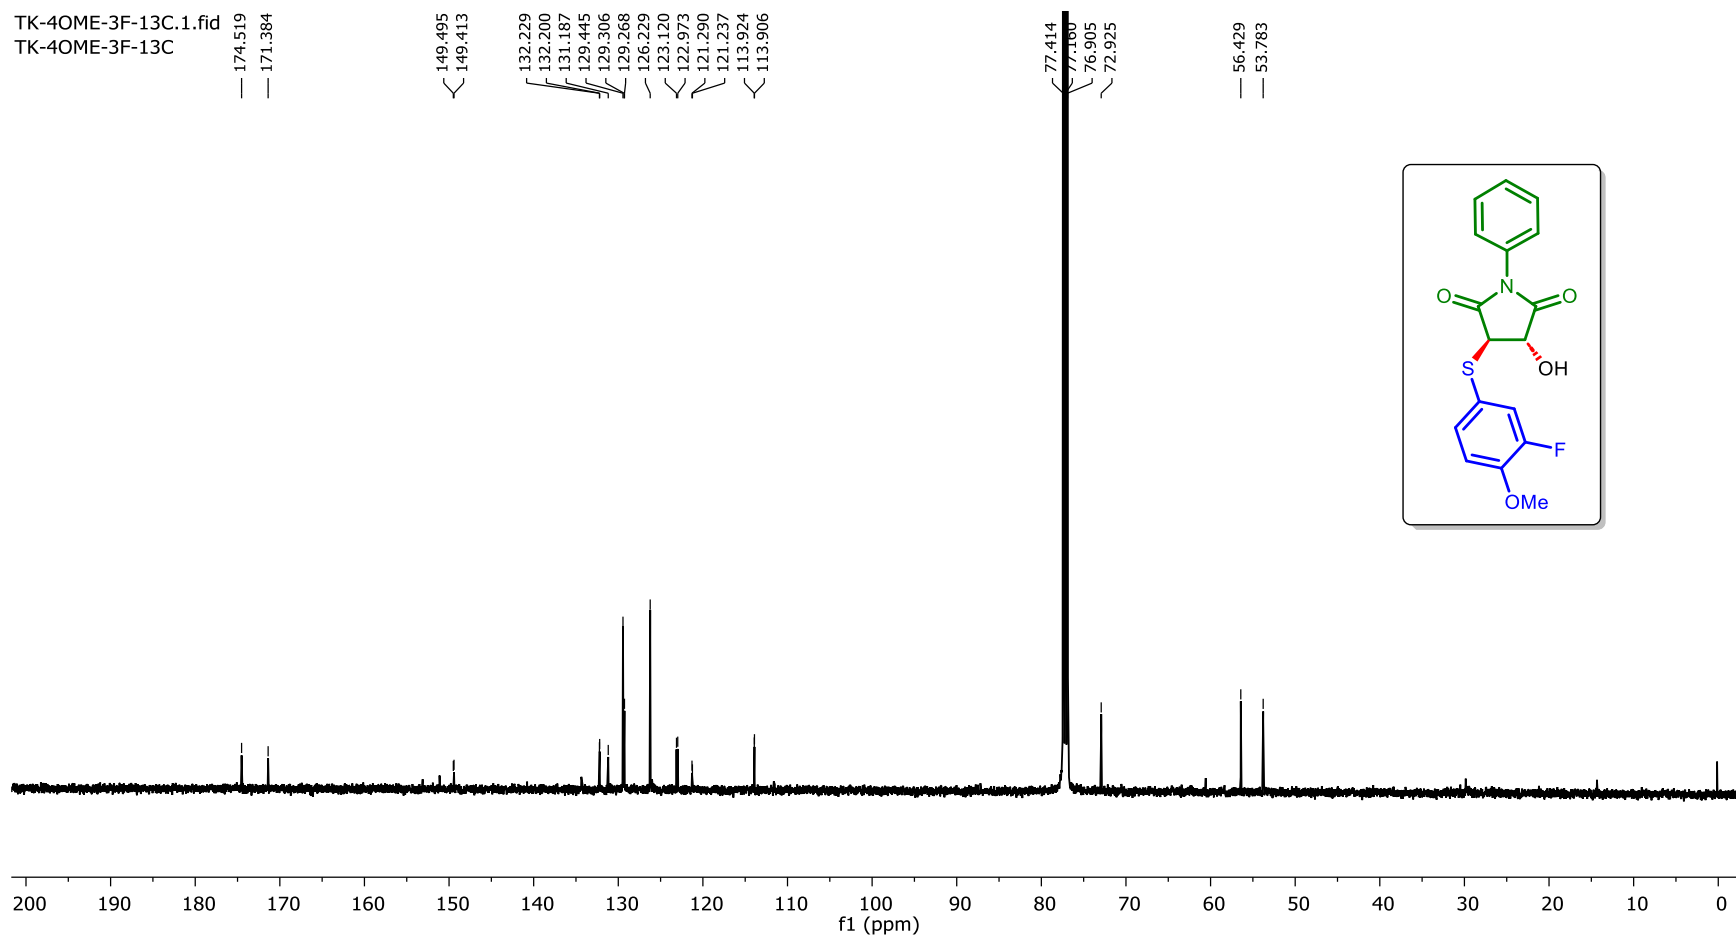

**(3R,4S)-3-((3-Fluoro-4-methoxyphenyl)thio)-4-hydroxy-1-phenylpyrrolidine-2,5-dione (3ae):  $^{13}\text{C}\{^1\text{H}\}$  NMR ( $\text{CDCl}_3$ , 126 MHz)**

TK-4OME-3F-19F.3.fid  
TK-4OME-3F-19F

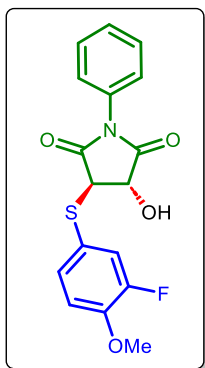

— -132.426

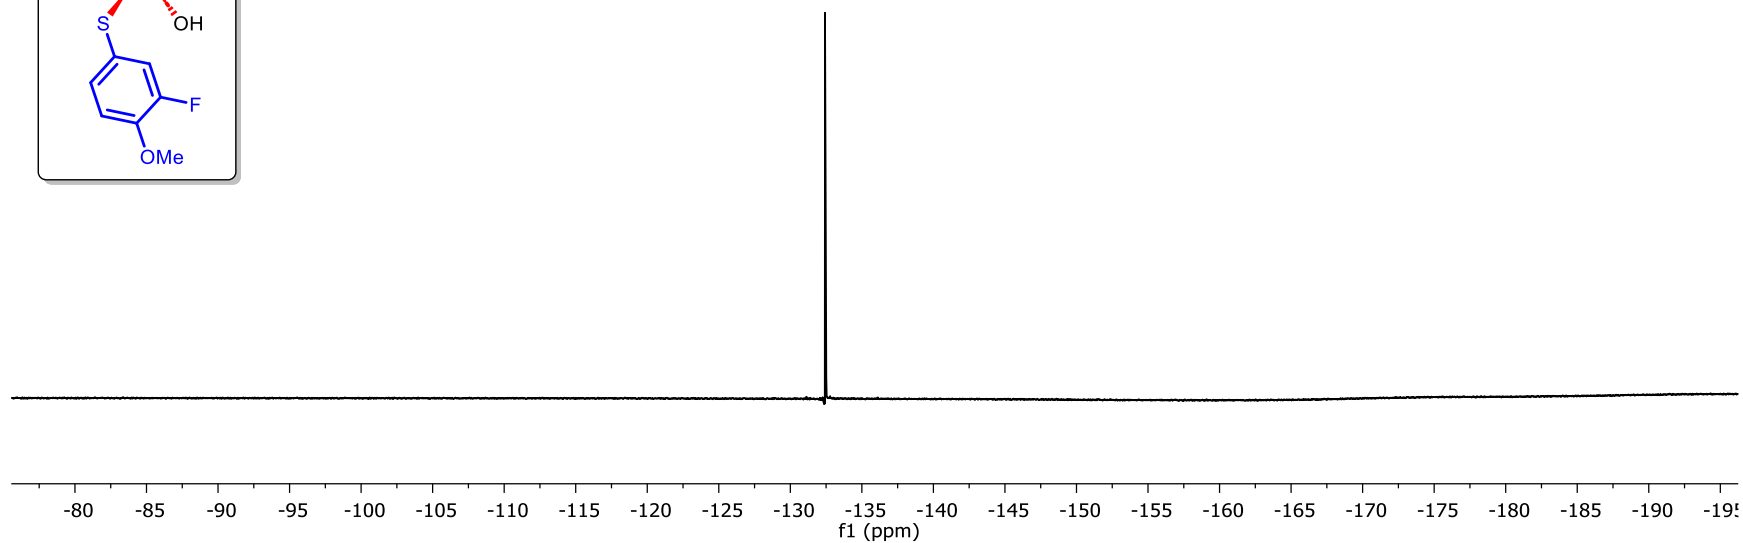

**(3*R*,4*S*)-3-((3-Fluoro-4-methoxyphenyl)thio)-4-hydroxy-1-phenylpyrrolidine-2,5-dione (3ae):  $^{19}\text{F}$  NMR ( $\text{CDCl}_3$ , 471 MHz)**

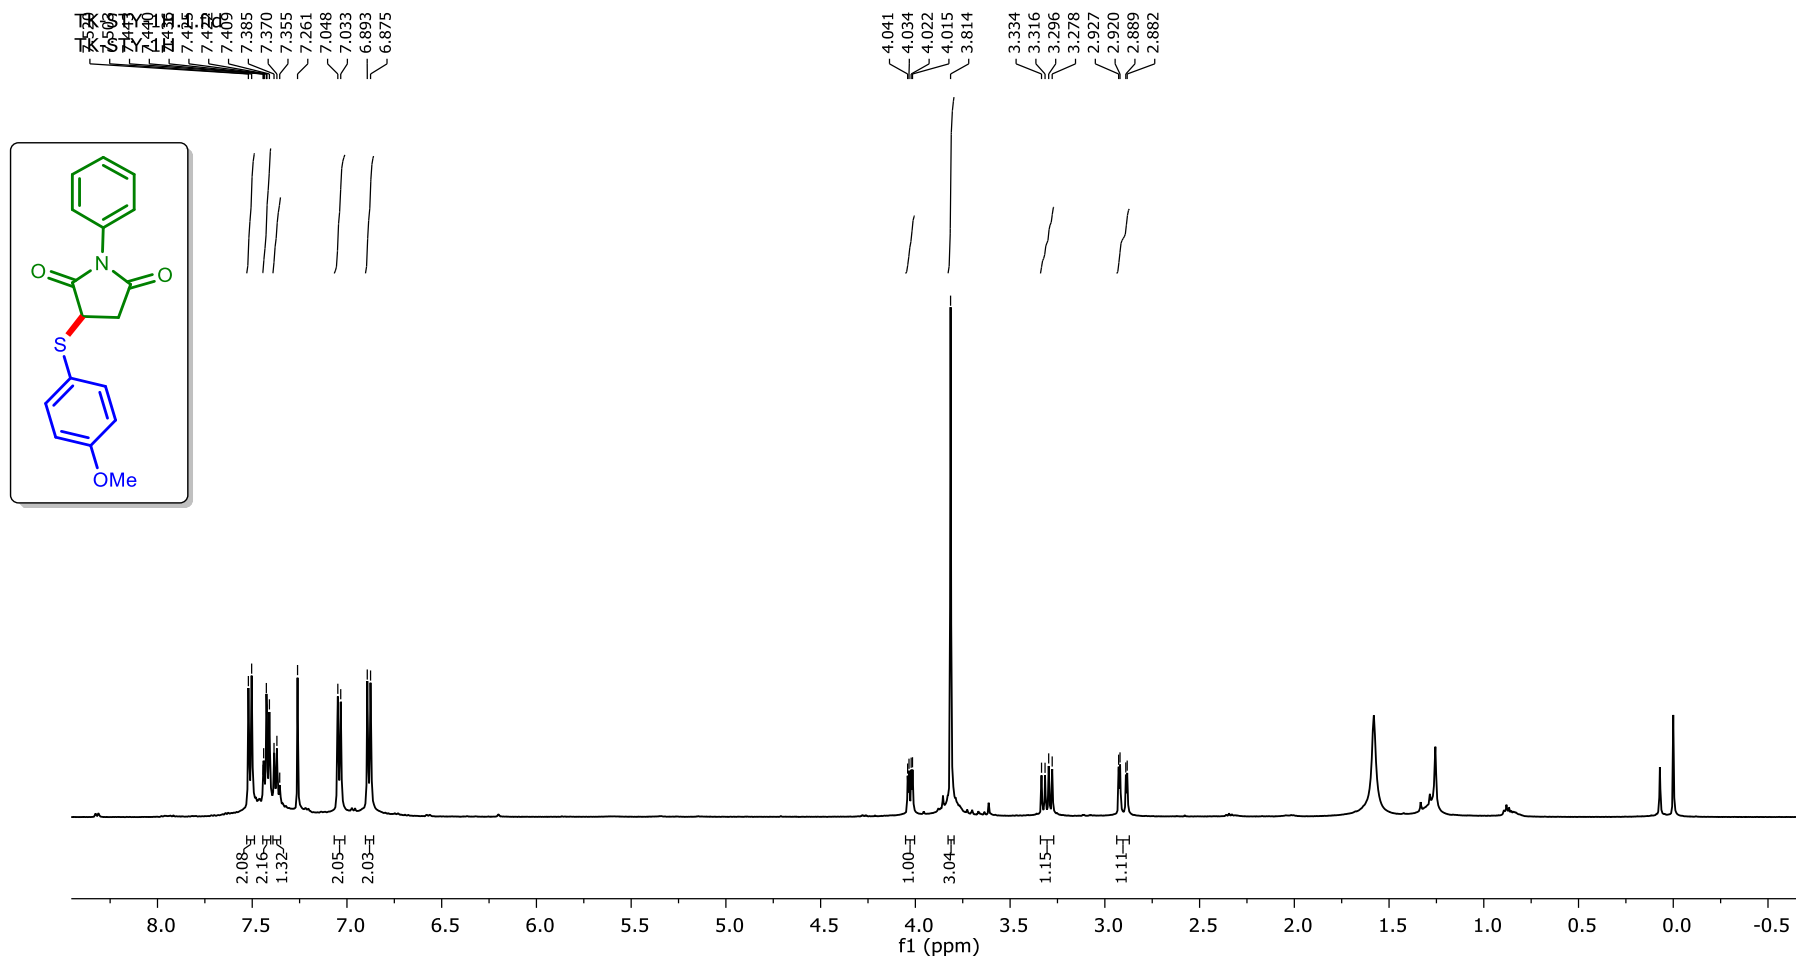

**3-((4-methoxyphenyl)thio)-1-phenylpyrrolidine-2,5-dione (6aa): <sup>1</sup>H NMR (CDCl<sub>3</sub>, 500 MHz)**



TK-STY-13C.1.fid  
TK-STY-13C

174.796  
173.786

161.425

137.920

131.716

129.265

128.914

126.488

119.719

115.207

77.414

77.160

76.905

55.562

44.716

36.351

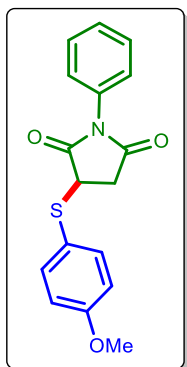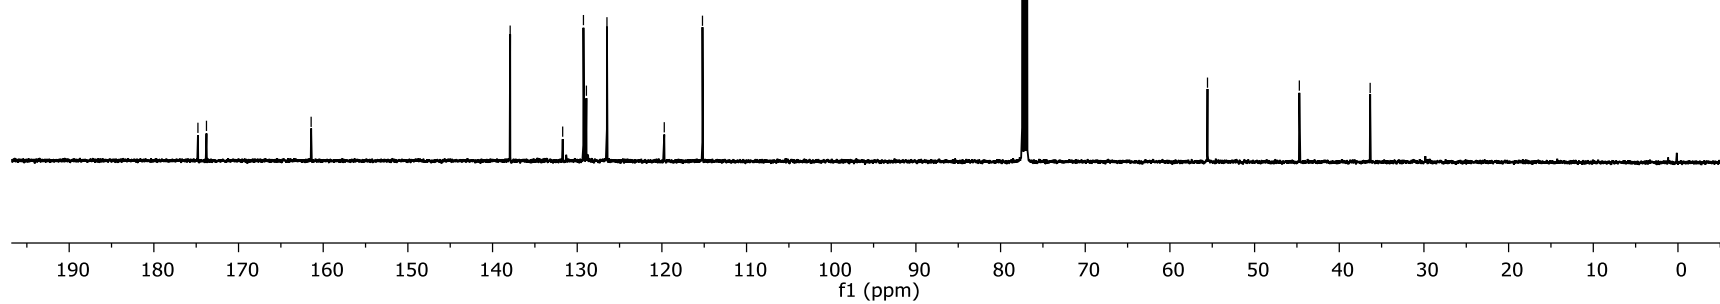

**3-((4-methoxyphenyl)thio)-1-phenylpyrrolidine-2,5-dione (6aa):  $^{13}\text{C}\{^1\text{H}\}$  NMR ( $\text{CDCl}_3$ , 126 MHz)**

## 11. NOE Experiment of 3ba

Upon irradiation of H<sub>a</sub>, enhancement was observed in the signal corresponding to H<sub>b</sub> (0.73% w.r.t. H<sub>a</sub>), which indicates that H<sub>a</sub> is in *trans* relation with H<sub>b</sub>. Similarly, upon irradiation of H<sub>b</sub>, enhancement was observed for H<sub>a</sub> (0.79% w.r.t. H<sub>b</sub>), which also indicates that H<sub>a</sub> is in *trans* relation with H<sub>b</sub>.

TK-4.1178-NOE.11.fid  
TK-4.1178-NOE

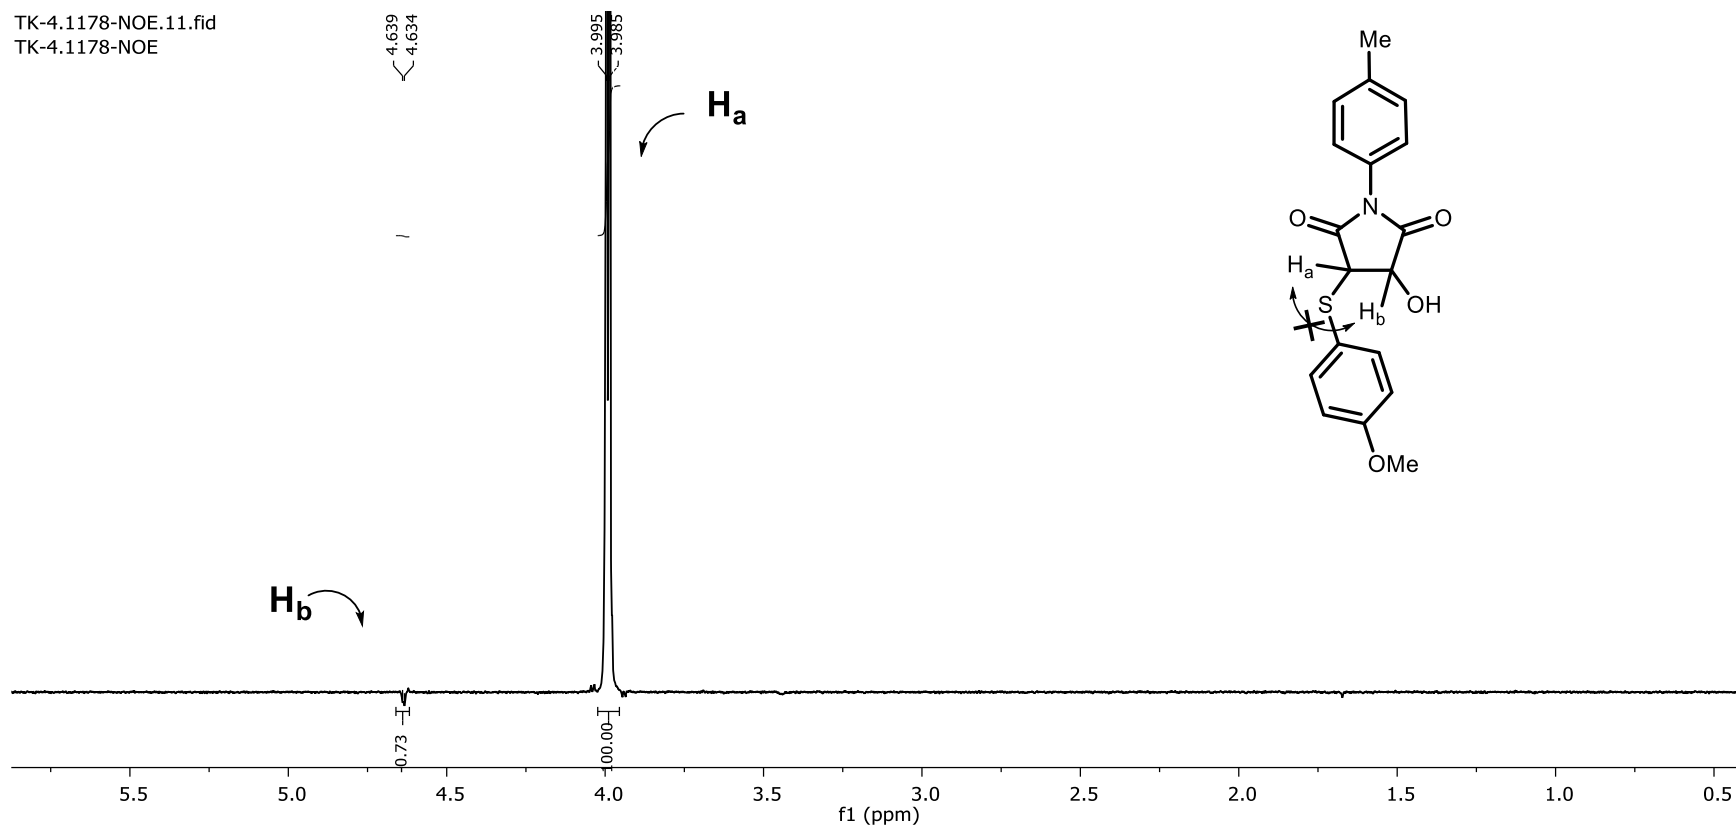

TK-4.7591-NOE.12.fid  
TK-4.7591-NOE

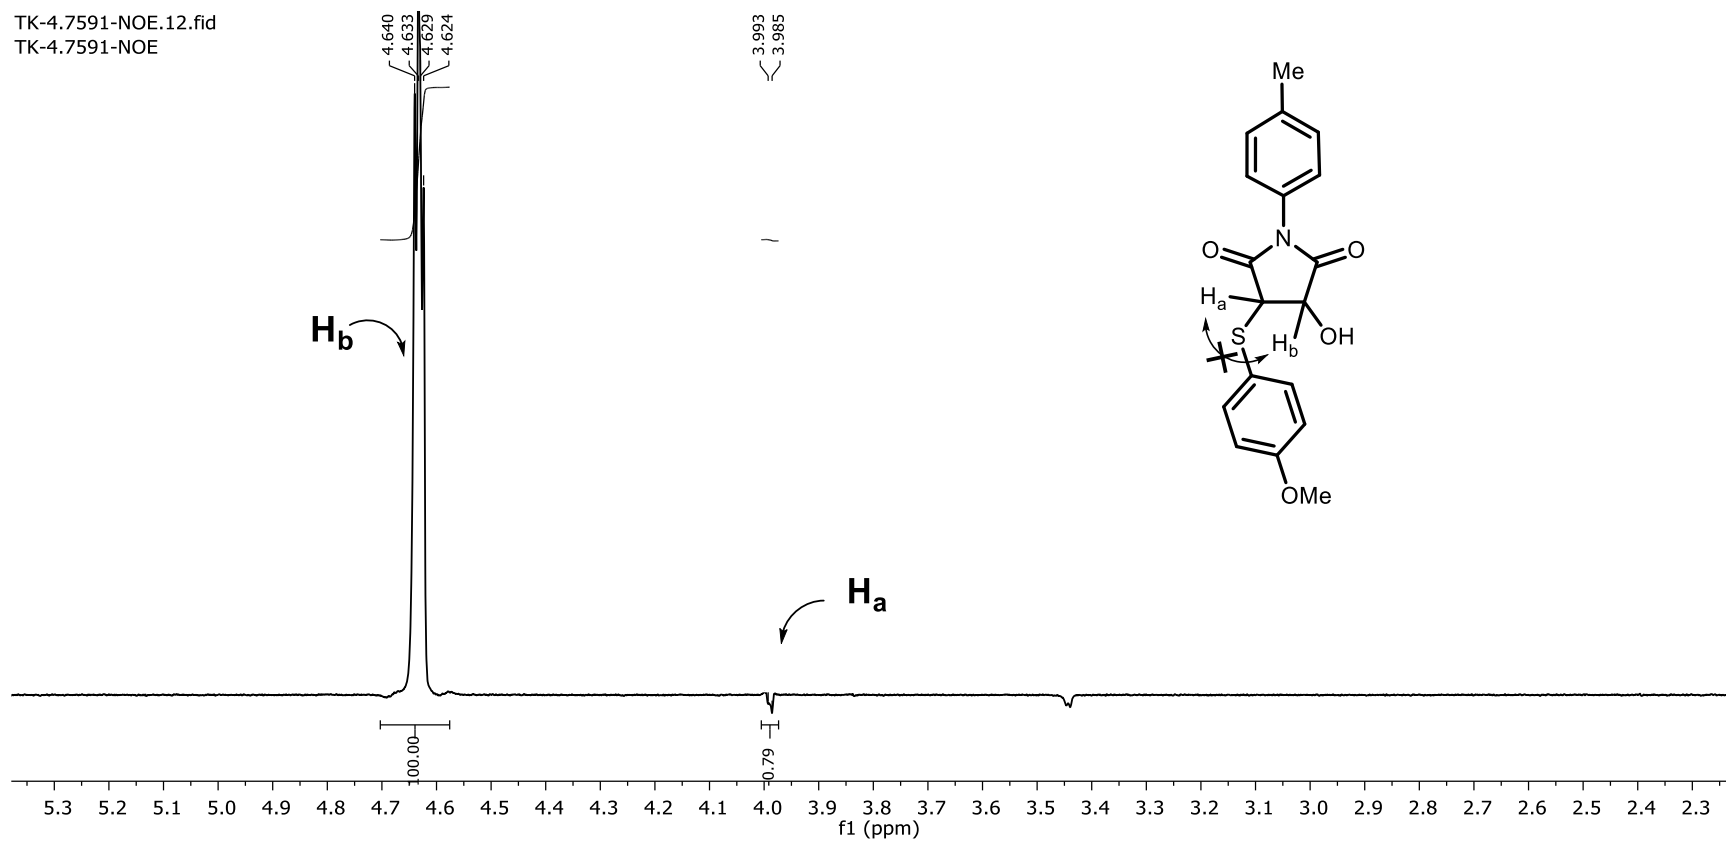

Supplement: d3cc03296e1.pdf [file d3cc03296e1.pdf]
